# Supplementary material for: Asymmetric Synthesis of [3.2.1]Tropane scaffolds via Enantioselective β-H elimi-nation reaction
Source: Research Square preprint supplement (doi:10.21203/rs.3.rs-7721563/v1), 2025-10-10
Supplement: Supplementary file 1 [file 4ade1e1fad5a1bf105f565a1.docx]

*Supporting Information*

**Asymmetric Synthesis of [3.2.1]Tropane Scaffolds via Enantioselective *β*-H Elimination Reaction**

Chao Fang1, Junpeng Ai5, Quanpu Wang1, Bing Xu2, Junliang Zhang1,4,6,7* & Zhan-Ming Zhang1,3,6*

1Department of Chemistry, Fudan University, 2005 Songhu Road, Shanghai, 200438, P. R. China.

2 School of Pharmacy, Naval Medical University, Shanghai 200433, China.

3Fudan Zhangjiang Institute, Shanghai, 201203, P. R. China.

4State Key Laboratory of Organometallic Chemistry, Shanghai Institute of Organic Chemistry, Chinese Academy of Sciences, Shanghai, 200032, P. R. China.

5Chemical Engineering and Materials Science & Collaborative Innovation Center of Suzhou Nano Science and Technology, Soochow University, Suzhou 215123, P. R. China.

6State Key Laboratory of Green Chemical Synthesis and Conversion.

7School of Chemistry and Chemical Engineering, Henan Normal University, Xinxiang, Henan, 453007, P. R. China.

*Corresponding Authors: [junliangzhang@fudan.edu.cn](mailto:junliangzhang@fudan.edu.cn); zhanmingzhang@fudan.edu.cn.

**Contents**

- 1. [General Information S1](#_Toc357886346)
  2. [Screening for Palladium-Catalyzed Enantioselective *β*-H Eimination Reaction. S2](#_Toc357886346)
  3. General Procedure for the Synthesis of *N*-arylsulfonylhydrazones **1a-1h** S3
  4. General Procedure for the Synthesis of Products **3a-3ce**, **4a-4k**. S8
  5. General Procedure for the Synthesis of Products **7-22**. S54
  6. Bioactive investigations. S67
  7. [Non-Linear Effect Experiments S](#_Toc357886349)68
  8. [Kinetic Studies: Kinetic Orders in Palladium/**Ming-Phos**-catalyzed Enantioselective *β*−H Elimination Reaction S](#_Toc357886349)70
  9. Data: Deuterium Kinetic Isotope Experiments  [S](#_Toc357886349)78
  10. Hammett Plots Experiments  [S](#_Toc357886349)81
  11. [X-Ray Structure and Crystal Data of **3bd** S](#_Toc357886349)82
  12. [1H , 19F, 31P, 13C NMR, HPLC Spectra S](#_Toc357886349)94
  13. [References S](#_Toc357886349)263

1. **General Information**

All reactions were carried out under an atmosphere of argon in sealed tube with magnetic stirring. 1H NMR spectra, 19F NMR spectra, 31P NMR spectra, 13C NMR spectra were recorded on a Bruker 400MHz spectrometer in CDCl3. All signals are reported in ppm with the internal TMS signal at 0 ppm as a standard. Data for 1H NMR spectra are reported as follows: chemical shift (ppm, referenced to TMS; s = singlet, d = doublet, t = triplet, dd = doublet of doublets, m = multiplet), coupling constant (Hz), and integration. Data for 13C NMR are reported in terms of chemical shift (ppm) relative to residual solvent peak (CDCl3: 77.0 ppm). Reactions were monitored by thin layer chromatography (TLC) using silica gel plates. Flash column chromatography was performed over silica gel (300-400 mesh). The spectral data of the substrates were consistent with that reported in the literature. A **Sadphos** kit was purchased from Daicel. The enantiomeric excesses of the products were determined by HPLC with Chiralpak IA, IBN5, IF, IG, ADH, ODH, OJH.

1. **Screening for Palladium-Catalyzed Enantioselective** ***β*-H Elimination Reaction**

**Table S1.** Screening of various types of commercially available ligands and sadphos.

1. **General Procedure for the Synthesis of *N*-arylsulfonylhydrazones 1a-1h.**

1. **Typical procedure for the synthesis of sulfonylhydrazones 1a-1h:** A mixture of **I** (5 mmol), **II** (5 mmol), TsOH (10 mol%) in MeOH (20 mL) was stirred at 50 oC overnight. After completion of the reaction (monitored by TLC), the crude material was purified by column chromatography to provide **1**.
2. Synthesis of benzyl (1*R*,5*S*)-3-(2-tosylhydrazineylidene)-8-azabicyclo[3.2.1]octane-8-carboxylate (**1a**).

**1H NMR** (400 MHz, CDCl3) δ 8.03 – 7.92 (m, 1 H), 7.82 – 7.80 (m, 2 H), 7.37 – 7.26 (m, 6 H), 5.11 (d, *J* = 3.2 Hz, 2 H), 4.38 (s, 2 H), 2.53 (d, *J* = 15.8 Hz, 2 H), 2.42 (s, 3 H), 2.35 – 2.12 (m, 2 H), 1.98 – 1.87 (m, 2 H), 1.61 – 1.53 (d, *J* = 10.6 Hz, 1 H), 1.37 (t, *J* = 9.4 Hz, 1 H).

**13C NMR** (101 MHz, CDCl3) δ 153.43, 144.08, 136.42, 135.24, 129.53, 128.50, 128.09, 127.92, 127.89, 67.00, 53.42, 52.18, 40.98 (d, *J* = 57.6 Hz), 33.74 (d, *J* = 71.8 Hz), 29.38(d, *J* = 76.8 Hz), 21.56.

HRMS (ESI) calculated for [M+H]+ = [C22H26N3O4S]+: 428.1639 found: 428.1641.

1. Synthesis of benzyl (1*R*,5*S*)-3-(2-(mesitylsulfonyl)hydrazineylidene)-8-azabicyclo[3.2.1]octane-8-carboxylate (**1b**).

**1H NMR** (400 MHz, CDCl3) δ 7.82 (s, 1 H), 7.38 – 7.28 (m, 4 H), 6.95 (s, 2 H), 5.13 (s, 2 H), 4.41 (s, 2 H), 2.65 (s, 6 H), 2.52 (t, *J* = 15.1 Hz, 2 H), 2.29 (s, 3 H), 2.27 – 2.11 (m, 2 H), 1.99 – 1.92 (m, 2 H), 1.54 (t, *J* = 9.3 Hz, 1 H), 1.43 – 1.34 (m, 1 H).

**13C NMR** (101 MHz, CDCl3) δ 153.44, 142.82, 140.08, 136.44, 131.80, 128.55, 128.49, 128.09, 127.99, 127.89, 67.00, 53.44, 52.17, 41.29 (d, *J* = 57.6 Hz), 33.68 (d, *J* = 67.0 Hz), 28.41 (d, *J* = 40.6 Hz), 23.15, 20.94.

HRMS (ESI) calculated for [M+H]+ = [C24H30N3O4S]+: 456.1952 found: 456.1953.

1. Synthesis of benzyl (1*R*,5*S*)-3-(2-((2,4,6-triisopropylphenyl)sulfonyl)hydrazineylidene)-8-azabicyclo[3.2.1]octane-8-carboxylate (**1c**).

**1H NMR** (400 MHz, CDCl3) δ 7.40 – 7.29 (m, 5 H), 7.16 (s, 2 H), 5.13 (s, 2 H), 4.43 (s, 2 H), 4.25 – 4.14 (m, 2 H), 2.96 – 2.85 (m, 1 H), 2.50 (d, *J* = 15.2 Hz, 2 H), 2.29 (d, *J* = 15.3 Hz, 2 H), 1.99 – 1.95 (m, 2 H), 1.62 (d, *J* = 16.0 Hz, 2 H), 1.46 – 1.37 (m, 1 H), 1.29 – 1.20 (m, 18 H).

**13C NMR** (101 MHz, CDCl3) δ 153.31, 151.31, 136.46, 131.17, 128.53, 128.14, 127.95, 123.79, 67.05, 53.42, 52.12, 34.14, 29.92, 24.79, 24.77, 23.53, 23.51.

HRMS (ESI) calculated for [M+H]+ = [C30H42N3O4S]+: 540.2891 found: 540.2893.

1. Synthesis of benzyl (1*R*,5*S*)-3-(2-((4-methoxyphenyl)sulfonyl)hydrazineylidene)-8-azabicyclo[3.2.1]octane-8-carboxylate (**1d**).

**1H NMR** (400 MHz, CDCl3) δ 8.07 – 7.84 (m, 3 H), 7.37 – 7.27 (m, 4 H), 6.96 (dd, *J* = 8.6, 1.5 Hz, 2 H), 5.11 (s, 2 H), 4.39 – 4.38 (m, 2 H), 3.85 (t, *J* = 1.4 Hz, 3 H), 2.54 (d, *J* = 15.9 Hz, 2 H), 2.37 – 2.09 (m, 2 H), 1.91 (d, *J* = 7.6 Hz, 2 H), 1.62 – 1.56 (m, 1 H), 1.42 – 1.33 (m, 1 H).

**13C NMR** (101 MHz, CDCl3) δ 163.32, 153.43, 136.42, 130.09, 128.50, 128.09, 127.98, 127.88, 114.09, 67.00, 55.59, 53.43, 52.19, 41.31(d, *J* = 56.2 Hz) , 34.07 (d, *J* = 60.2 Hz), 28.96 (d, *J* = 83.0 Hz).

HRMS (ESI) calculated for [M+H]+ = [C22H26N3O5S]+: 444.1588 found: 444.1590.

1. Synthesis of benzyl (1*R*,5*S*)-3-(2-(naphthalen-2-ylsulfonyl)hydrazineylidene)-8-azabicyclo[3.2.1]octane-8-carboxylate (**1e**).

**1H NMR** (400 MHz, CDCl3) δ 8.52 (d, *J* = 1.8 Hz, 1 H), 8.00 – 7.86 (m, 4 H), 7.67 – 7.58 (m, 2 H), 7.35 – 7.25 (m, 5 H), 5.09 (s, 2 H), 4.37 (s, 2 H), 2.52 (d, *J* = 15.5 Hz, 2 H), 2.54 – 2.16 (m, 2 H), 1.91 – 1.88 (m, 2 H), 1.53 (s, 1 H), 1.37 (d, *J* = 10.2 Hz, 1 H).

**13C NMR** (101 MHz, CDCl3) δ 136.39, 135.06, 132.06, 129.71, 129.36, 129.18, 129.05, 128.50, 128.11, 127.88, 127.54, 122.83, 67.03, 53.39, 52.13, 40.86 (d, *J* = 56.2 Hz) , 34.07 (d, *J* = 60.2 Hz), 28.42 (d, *J* = 83.0 Hz).

HRMS (ESI) calculated for [M+H]+ = [C25H26N3O4S]+: 464.1639 found: 464.1640.

1. Synthesis of tert-butyl (1*R*,5*S*-3-(2-((2,4,6-triisopropylphenyl)sulfonyl)hydrazineylidene)-8-azabicyclo[3.2.1]octane-8-carboxylate (**1f**).

**1H NMR** (400 MHz, CDCl3) δ 7.56 (s, 1 H), 7.16 (s, 2 H), 4.30 – 4.17 (m, 4 H), 2.95 – 2.85 (m, 1 H), 2.60 – 2.47 (m, 2 H), 2.25 (d, *J* = 15.3 Hz, 2 H), 1.99 – 1.92 (m, 2 H), 1.67 (dt, *J* = 75.3, 7.0 Hz, 2 H), 1.44 (d, *J* = 0.9 Hz, 9 H), 1.33 – 1.19 (m, 18 H).

**13C NMR** (101 MHz, CDCl3) δ 153.23, 151.33, 131.21, 123.74, 79.97, 51.91, 34.11, 29.87, 28.40, 24.76, 23.52, 23.51.

HRMS (ESI) calculated for [M+H]+ = [C27H44N3O4S]+: 506.3047 found: 506.3047.

1. Synthesis of N'-((1*R*,5*S*)-8-benzoyl-8-azabicyclo[3.2.1]octan-3-ylidene)-2,4,6-triisopropylbenzenesulfonohydrazide (**1g**).

**1H NMR** (400 MHz, CDCl3) δ 7.71 – 7.52 (m, 1 H), 7.48 – 7.37 (m, 5 H), 7.16 (s, 2 H), 4.92 (s, 1 H), 4.26 – 4.12 (m, *J* = 6.8 Hz, 3 H), 2.96 – 2.83 (m, 1 H), 2.60 – 2.45 (m, 2 H), 2.29 – 2.15 (s, 2 H), 2.00 (s, 2 H), 1.69 (t, *J* = 8.9 Hz, 1 H), 1.52 (q, *J* = 7.8 Hz, 1 H), 1.25 (dd, *J* = 6.8, 5.4 Hz, 18 H)..

**13C NMR** (101 MHz, CDCl3) δ 153.34, 151.32, 135.61, 130.40, 128.65, 128.56, 127.10, 127.05, 123.79, 34.13, 29.90, 24.78, 23.53, 23.50.

HRMS (ESI) calculated for [M+H]+ = [C29H40N3O3S]+: 510.2785 found: 510.2787.

1. Synthesis of ethyl (1*R*,5*S*)-3-(2-((2,4,6-triisopropylphenyl)sulfonyl)hydrazineylidene)-8-azabicyclo[3.2.1]octane-8-carboxylate (**1h**).

**1H NMR** (400 MHz, CDCl3) δ 7.64 (s, 1 H), 7.16 (s, 2 H), 4.38 (s, 2 H), 4.25 – 4.18 (m, 2 H), 4.13 (q, *J* = 7.1 Hz, 2 H), 2.95 – 2.85 (m, 1 H), 2.53 (d, *J* = 15.4 Hz, 2 H), 2.28 (d, *J* = 15.3 Hz, 2 H), 1.97 – 1.90 (m, 2 H), 1.59 (d, *J* = 10.5 Hz, 1 H), 1.45 (s, 1 H), 1.31 – 1.22 (m, 21 H).

**13C NMR** (101 MHz, CDCl3) δ 153.75, 153.25, 151.31, 131.21, 123.76, 61.25, 53.25, 51.99, 34.12, 29.88, 24.77, 23.52, 23.50, 14.66.

HRMS (ESI) calculated for [M+H]+ = [C25H40N3O4S]+: 478.2734 found: 478.2739.

1. **General Procedure for the Synthesis of Products 3a-3ce, 4a-4k.**

**Typical procedure A for the** **chiral *N*-bridged [3.2.1] Tropane derivatives.**

A 10 mL oven-dried sealed tube was added substrate **1** (0.30 mmol, 1.0 equiv.), Pd2(dba)3•CHCl3 (15.5 mg, 0.015 mmol, 5 mol%), **M26** (38.3 mg, 0.06 mmol, 20 mol%), Cs2CO3 (391.2 mg, 1.2 mmol, 4.0 equiv.). The flask was evacuated and refilled with argon. Then, substrate **2** (0.36 mmol, 1.2 equiv.), DMA (3 mL) were added to the tube, and stirred at room temperature for 1 h. Then the mixture was stirred at 50 °C for 36-60 h. After the reaction was complete (monitored by TLC), the solvent was removed under reduced pressure. The crude product was then purified by flash column chromatography on silica gel to afford the desired product **3**.

**Typical procedure B for the chiral *N*-bridged [3.2.1] Tropane derivatives.**

A 10 mL oven-dried sealed tube was added substrate **1** (0.30 mmol, 1.0 equiv.), Pd2(dba)3•CHCl3 (15.5 mg, 0.015 mmol, 5 mol%), **M27** (38.3 mg, 0.06 mmol, 20 mol%), Cs2CO3 (391.2 mg, 1.2 mmol, 4.0 equiv.). The flask was evacuated and refilled with argon. Then, substrate **2** (0.36 mmol, 1.2 equiv.), DMA (3 mL) were added to the tube, and stirred at room temperature for 1 h. Then the mixture was stirred at 50 °C for 36-60 h. After the reaction was complete (monitored by TLC), the solvent was removed under reduced pressure. The crude product was then purified by flash column chromatography on silica gel to afford the desired product **3.**

**Typical procedure C for the chiral *N*-bridged [3.2.1] Tropane derivatives.**

A 10 mL oven-dried sealed tube was added substrate **1** (0.30 mmol, 1.0 equiv.), Pd2(dba)3•CHCl3 (15.5 mg, 0.015 mmol, 5 mol%), **M27** (38.3 mg, 0.06 mmol, 20 mol%), Cs2CO3 (391.2 mg, 1.2 mmol, 4.0 equiv.). The flask was evacuated and refilled with argon. Then, substrate **2** (0.36 mmol, 1.2 equiv.), PhMe (3 mL) were added to the tube, and stirred at room temperature for 1 h. Then the mixture was stirred at 50 °C for 36-60 h. After the reaction was complete (monitored by TLC), solvent was removed under reduced pressure. The crude product was then purified by flash column chromatography on silica gel to afford the desired product **3**

- 1. Synthesis of benzyl (1*R*,5*S*)-3-phenyl-8-azabicyclo[3.2.1]oct-2-ene-8-carboxylate (**3a**).

Prepared according to typical procedure **A** from *N*-sulfonylhydrazone **1c** (162.0 mg, 0.3 mmol), after a flash column chromatography (hexanes:EA = 8:1) afforded the product **3a** as a colorless oil (84.6 mg, 88% yield) with 91% *ee*. 1H NMR (400 MHz, CDCl3) δ 7.35 – 7.22 (m, 10 H), 6.43 (d, *J* = 12.1 Hz, 1 H), 5.14 (d, *J* = 3.9 Hz, 2 H), 4.57 (d, *J* = 21.5 Hz, 2 H), 3.11 (dd, *J* = 70.3, 17.1 Hz, 1 H), 2.24 (dd, *J* = 14.8, 8.4 Hz, 2 H), 2.07 – 1.95 (m, 2 H), 1.72 (dt, *J* = 14.9, 8.1 Hz, 1 H). 13C NMR (101 MHz, CDCl3) δ 154.06, 139.71, 136.91, 133.90, 133.39, 128.42, 128.32, 127.84, 127.73, 127.43, 124.86, 66.67, 53.38, 52.23, 36.16 (d, *J* = 69.8 Hz), 34.52 (d, *J* = 68.6 Hz), 29.93 (d, *J* = 54.2 Hz). HRMS (EI) calculated for [C21H21NO2]+: 315.1967 found: 319.1568. Enantiomeric excess was determined by HPLC with a Chiralpak ODH column (hexanes:2-propanol = 95:5, 1.0 mL/min, 254 nm); minor enantiomer Rt = 11.8 min, major enantiomer Rt = 12.4 min. [α]D20 = 32.1 (*c* = 0.3, CHCl3).

- 1. Synthesis of benzyl (1*R*,5*S*)-3-(p-tolyl)-8-azabicyclo[3.2.1]oct-2-ene-8-carboxylate (**3b**).

Prepared according to typical procedure **A** from *N*-sulfonylhydrazone **1c** (162.0 mg, 0.3 mmol), after a flash column chromatography (hexanes:EA = 8:1) afforded the product **3b** as a white solid (94.3 mg, 94% yield) with 90% *ee*. Mp: 86-88 oC. 1H NMR (400 MHz, CDCl3) δ 7.37 – 7.30 (m, 5 H), 7.25 (d, *J* = 7.7 Hz, 2 H), 7.13 (d, *J* = 7.9 Hz, 2 H), 6.41 (s, 1 H), 5.15 (d, *J* = 3.9 Hz, 2 H), 4.60 (s, 2 H), 3.11 (dd, *J* = 68.6, 16.4 Hz, 1 H), 2.35 (s, 3 H), 2.27 – 2.19 (m, 2 H), 2.08 – 1.91 (m, 2 H), 1.77 – 1.70 (m, 1 H). 13C NMR (101 MHz, CDCl3) δ 154.03, 137.17, 136.91, 136.85, 133.65, 133.12, 128.97, 128.39, 127.80, 127.67, 124.70, 66.61, 53.36, 52.22, 36.18 (d, *J* = 71.2 Hz), 34.52 (d, *J* = 70.1 Hz), 29.91 (d, *J* = 52.4 Hz), 21.00. HRMS (ESI) calculated for [M+Na]+ = [C22H23NNaO2]+: 356.1621 found: 356.1619. Enantiomeric excess was determined by HPLC with a Chiralpak IA column (hexanes:2-propanol = 90:10, 1.0 mL/min, 254 nm); major enantiomer Rt = 8.8 min, minor enantiomer Rt = 9.6 min. [α]D20 = 15.0 (*c* = 0.3, CHCl3).

- 1. Synthesis of benzyl (1*R*,5*S*)-3-(4-isopropylphenyl)-8-azabicyclo[3.2.1]oct-2-ene-8-carboxylate (**3c**).

Prepared according to typical procedure **A** from *N*-sulfonylhydrazone **1c** (162.0 mg, 0.3 mmol), after a flash column chromatography (hexanes:EA = 8:1) afforded the product **3c** as a colorless oil (88.7 mg, 82% yield) with 94% *ee*. 1H NMR (400 MHz, CDCl3) δ 7.38 – 7.30 (m, 7 H), 7.21 – 7.19 (m, 2 H), 6.42 (s, 1 H), 5.15 (d, *J* = 5.5 Hz, 2 H), 4.61 (s, 2 H), 3.12 (dd, *J* = 73.2, 16.9 Hz, 1 H), 2.96 – 2.86 (m, 1 H), 2.30 – 2.16 (m, 2 H), 2.08 – 1.95 (m, 2 H), 1.74 (d, *J* = 8.2 Hz, 1 H), 1.26 (d, *J* = 6.9 Hz, 6 H). 13C NMR (101 MHz, CDCl3) δ 154.04, 148.26, 137.19, 136.92, 133.69, 133.15, 128.39, 127.74 (d, *J* = 12.1 Hz), 127.11, 126.35, 124.76, 66.62, 53.39, 52.24, 36.12 (d, *J* = 71.6 Hz), 34.52 (d, *J* = 68.3 Hz), 33.72, 29.72 (d, *J* = 91.2 Hz), 23.90 (d, *J* = 1.4 Hz). HRMS (EI) calculated for [C24H27NO2]+: 361.2036 found: 361.2039. Enantiomeric excess was determined by HPLC with a Chiralpak IA column (hexanes: 2-propanol = 90:10, 1.0 mL/min, 254 nm); major enantiomer Rt = 8.3 min, minor enantiomer Rt = 9.1 min. [α]D20 = 36.5 (*c* = 0.3, CHCl3).

- 1. Synthesis of benzyl (*1R*,5S)-3-([1,1'-biphenyl]-4-yl)-8-azabicyclo[3.2.1]oct-2-ene-8-carboxylate (**3d**).

Prepared according to typical procedure **A** from *N*-sulfonylhydrazone **1c** (162.0 mg, 0.3 mmol), after a flash column chromatography (hexanes:EA = 8:1) afforded the product **3d** as a white solid (89.2 mg, 75% yield) with 90% *ee*. Mp: 117-119 oC. 1H NMR (400 MHz, CDCl3) δ 7.65 – 7.58 (m, 4 H), 7.50 – 7.45 (m, 4 H), 7.41 – 7.31 (m, 6 H), 6.53 (s, 1 H), 5.20 (d, *J* = 4.2 Hz, 2 H), 4.67 (s, 2 H), 3.19 (dd, *J* = 73.5, 17.0 Hz, 1 H), 2.30 (dd, *J* = 18.2, 13.1 Hz, 2 H), 2.13 – 1.98 (m, 2 H), 1.81 – 1.74 (m, 1 H). 13C NMR (101 MHz, CDCl3) δ 154.00, 140.50, 140.13, 138.53, 136.85, 133.32, 132.84, 128.70, 128.37, 127.80, 127.67, 127.23, 126.91, 126.82, 125.16, 66.62, 53.37, 52.18, 36.04 (d, *J* = 70.6 Hz), 34.46 (d, *J* = 68.4 Hz), 29.70 (d, *J* = 90.6 Hz). HRMS (EI) calculated for [C27H25NO2]+: 395.1880 found: 395.1880. Enantiomeric excess was determined by HPLC with a Chiralpak IA column (hexanes:2-propanol = 90:10, 1.0 mL/min, 254 nm); major enantiomer Rt = 13.4 min, minor enantiomer Rt = 15.6 min. [α]D20 = 51.1 (*c* = 0.3, CHCl3).

- 1. Synthesis of benzyl (1*R*,5*S*)-3-(4-methoxyphenyl)-8-azabicyclo[3.2.1]oct-2-ene-8-carboxylate (**3e**).

Prepared according to typical procedure **A** from *N*-sulfonylhydrazone **1c** (162.0 mg, 0.3 mmol), after a flash column chromatography (hexanes:EA = 6:1) afforded the product **3e** as a colorless oil (80.5 mg, 77% yield) with 91% *ee*. Mp: 103-104 oC. 1H NMR (400 MHz, CDCl3) δ 7.38 – 7.29 (m, 7 H), 6.90 – 6.85 (m, 2 H), 6.35 (s, 1 H), 5.16 (d, *J* = 3.8 Hz, 2 H), 4.61 (s, 2 H), 3.81 (s, 3 H), 3.10 (dd, *J* = 70.3, 16.8 Hz, 1 H), 2.26 – 2.19 (m, 2 H), 2.09 – 1.99 (m, 2 H), 1.73 (dt, *J* = 12.8, 8.0 Hz, 1 H). 13C NMR (101 MHz, CDCl3) δ 158.99, 153.96, 136.86, 133.10, 132.19, 128.33, 127.74, 126.50, 126.06, 125.84, 113.59, 66.54, 55.16, 53.31, 52.16, 36.15 (d, *J* = 71.3 Hz), 34.48 (d, *J* = 68.1 Hz), 29.65 (d, *J* = 90.4 Hz). HRMS (EI) calculated for [C22H23NO3]+: 349.1672 found: 349.1674. Enantiomeric excess was determined by HPLC with a Chiralpak IA column (hexanes:2-propanol = 90:10, 1.0 mL/min, 254 nm); major enantiomer Rt = 12.1 min, minor enantiomer Rt = 13.5 min. [α]D20 = 60.2 (*c* = 0.3, CHCl3).

- 1. Synthesis of benzyl (1*R*,5*S*)-3-(4-(tert-butoxy)phenyl)-8-azabicyclo[3.2.1]oct-2-ene-8-carboxylate (**3f**).

Prepared according to typical procedure **A** from *N*-sulfonylhydrazone **1c** (162.0 mg, 0.3 mmol), after a flash column chromatography (hexanes:EA = 6:1) afforded the product **3f** as colorless oil (95.1 mg, 78% yield) with 93% *ee*. 1H NMR (400 MHz, CDCl3) δ 7.34 – 7.24 (m, 7 H), 6.94 – 6.92 (m, 2 H), 6.39 (s, 1 H), 5.13 (d, *J* = 4.9 Hz, 2 H), 4.59 (s, 2 H), 3.08 (d, *J* = 59.8 Hz, 1 H), 2.24 (d, *J* = 17.2 Hz, 2 H), 2.07 – 1.95 (m, 2 H), 1.76 – 1.68 (m, 1 H), 1.34 (s, 9 H). 13C NMR (101 MHz, CDCl3) δ 154.93, 153.97, 136.95, 134.68, 128.42, 127.83, 127.70, 127.44, 126.85, 125.24, 123.90, 66.66, 53.40, 52.25, 35.80, 34.88, 29.94 (d, *J* = 52.4 Hz), 29.68, 28.83. HRMS (EI) calculated for [C25H29NO3]+: 391.2142 found: 391.2140. Enantiomeric excess was determined by HPLC with a Chiralpak IF column (hexanes:2-propanol = 95:5, 1.0 mL/min, 254 nm); major enantiomer Rt = 17.6 min, minor enantiomer Rt = 18.6 min. [α]D20 = 16.3 (*c* = 0.3, CHCl3).

- 1. Synthesis of benzyl (1*R*,5*S*)-3-(4-(benzyloxy)phenyl)-8-azabicyclo[3.2.1]oct-2-ene-8-carboxylate (**3g**).

Prepared according to typical procedure **A** from *N*-sulfonylhydrazone **1c** (162.0 mg, 0.3 mmol), after a flash column chromatography (hexanes: EA = 6:1) afforded the product **3g** as a white solid (105.5 mg, 83% yield) with 91% *ee*. Mp: 99-101 oC. 1H NMR (400 MHz, CDCl3) δ 7.24 – 7.07 (m, 12 H), 6.76 – 6.71 (m, 2 H), 6.13 (s, 1 H), 4.95 (d, *J* = 4.1 Hz, 2 H), 4.86 (s, 2 H), 4.39 (s, 2 H), 2.88 (dd, *J* = 71.4, 17.0 Hz, 1 H), 2.04 – 1.99 (m, 2 H), 1.86 – 1.73 (m, 2 H), 1.51 (dt, *J* = 12.8, 8.0 Hz, 1 H). 13C NMR (101 MHz, CDCl3) δ 158.17, 153.96, 136.87, 133.06, 132.44, 128.47, 128.33, 127.84, 127.75, 127.65, 127.30, 126.62, 126.18, 125.86, 114.58, 69.89, 66.55, 53.31, 52.16, 36.12 (d, *J* = 71.9 Hz), 34.46 (d, *J* = 68.9 Hz), 29.65 (d, *J* = 91.1 Hz). HRMS (EI) calculated for [C28H27NO3]+: 425.1985 found: 425.1985. Enantiomeric excess was determined by HPLC with a Chiralpak IA column (hexanes:2-propanol = 90:10, 1.0 mL/min, 254 nm); major enantiomer Rt = 21.0 min, minor enantiomer Rt = 25.4 min. [α]D20 = 28.4 (*c* = 0.3, CHCl3).

- 1. Synthesis of (*R*)-1-(4-(3-((perfluorophenyl)methyl)-2,3-dihydrobenzofuran-3-yl)butyl)pyrrolidine-2,5-dione (**3h**).

Prepared according to typical procedure **A** from *N*-sulfonylhydrazone **1c** (162.0 mg, 0.3 mmol), after a flash column chromatography (hexanes:EA = 7:1) afforded the product **3h** as a white solid (89.9 mg, 74% yield) with 87% *ee*. Mp: 66-67 oC. 1H NMR (400 MHz, CDCl3) δ 7.36 – 7.26 (m, 7 H), 7.15 (d, *J* = 8.3 Hz, 2 H), 6.43 (d, *J* = 13.1 Hz, 1 H), 5.14 (d, *J* = 4.5 Hz, 2 H), 4.61 (s, 2 H), 3.09 (dd, *J* = 73.0, 17.2 Hz, 1 H), 2.23 (t, *J* = 13.5 Hz, 2 H), 2.09 – 1.95 (m, 2 H), 1.76 – 1.66 (m, 1 H). 13C NMR (101 MHz, CDCl3) δ 154.07, 148.47, 138.45, 136.84, 129.33, 128.89, 128.44, 127.91, 127.76, 126.21, 120.77, 120.44 (qm, *J*F = 129.3 Hz), 66.75, 53.34, 52.14, 36.16 (d, *J* = 70.0 Hz), 34.43 (d, *J* = 67.4 Hz), 29.74 (d, *J* = 88.5 Hz). 19F NMR (376 MHz, CDCl3) δ -57.88. HRMS (EI) calculated for [C22H20F3NO3]+: 403.1390 found: 403.1390. Enantiomeric excess was determined by HPLC with a Chiralpak IA column (hexanes:2-propanol = 90:10, 1.0 mL/min, 254 nm); major enantiomer Rt = 10.1 min, minor enantiomer Rt = 13.0 min. [α]D20 = 58.5 (*c* = 0.3, CHCl3).

- 1. Synthesis of benzyl (1*R*,5*S*)-3-(4-(difluoromethoxy)phenyl)-8-azabicyclo[3.2.1]oct-2-ene-8-carboxylate (**3i**).

Prepared according to typical procedure **A** from *N*-sulfonylhydrazone **1c** (162.0 mg, 0.3 mmol), after a flash column chromatography (hexanes:EA = 7:1) afforded the product **3i** as a colorless oil (84.9 mg, 74% yield) with 90% *ee*. 1H NMR (400 MHz, CDCl3) δ 7.35 – 7.26 (m, 7 H), 7.06 (d, *J* = 8.3 Hz, 2 H), 6.50 (t, *J* = 72.0 Hz, 1 H), 6.41 (d, *J* = 12.2 Hz, 1 H), 5.15 (d, *J* = 4.2 Hz, 2 H), 4.61 (s, 2 H), 3.09 (dd, *J* = 71.3, 17.2 Hz, 1 H), 2.23 (t, *J* = 12.6 Hz, 2 H), 2.08 – 1.95 (m, 2 H), 1.76 – 1.69 (m, 1 H). 13C NMR (101 MHz, CDCl3) δ 154.02, 150.40 (tm, *J*F = 2.9 Hz), 137.05, 136.83, 132.89,128.64, 128.40, 127.86, 127.71, 126.22, 119.32, 115.81 (tm, *J*F = 259.8 Hz), 66.68, 53.31, 52.12, 36.15 (d, *J* = 70.8 Hz), 34.42 (d, *J* = 68.3 Hz), 29.70 (d, *J* = 89.4 Hz). 19F NMR (376 MHz, CDCl3) δ -80.77 (d, *J* = 73.8 Hz). HRMS (EI) calculated for [C22H21F2NO3]+: 385.1484 found: 385.1485. Enantiomeric excess was determined by HPLC with a Chiralpak IA column (hexanes:2-propanol = 90:10, 1.0 mL/min, 254 nm); major enantiomer Rt = 15.4 min, minor enantiomer Rt = 19.2 min. [α]D20 = 45.3 (*c* = 0.3, CHCl3).

- 1. Synthesis of benzyl (1*R*,5*S*)-3-(4-(methylthio)phenyl)-8-azabicyclo[3.2.1]oct-2-ene-8-carboxylate (**3j**).

Prepared according to typical procedure **A** from *N*-sulfonylhydrazone **1c** (162.0 mg, 0.3 mmol), after a flash column chromatography (hexanes:EA = 7:1) afforded the product **3j** as a white solid (79.0 mg, 72% yield) with 91% *ee*. Mp: 97-99 oC. 1H NMR (400 MHz, CDCl3) δ 7.36 – 7.26 (m, 7 H), 7.22 – 7.18 (m, 2 H), 6.42 (s, 1 H), 5.14 (d, *J* = 4.0 Hz, 2 H), 4.60 (s, 2 H), 3.08 (dd, *J* = 65.9, 15.5 Hz, 1 H), 2.48 (s, 3 H), 2.25 – 2.19 (m, 2 H), 2.08 – 1.95 (m, 2 H), 1.76 – 1.69 (m, 1 H). 13C NMR (101 MHz, CDCl3) δ 154.01, 137.57, 136.87, 136.54, 133.22, 128.40, 127.83, 127.69, 127.40, 126.48, 125.20, 66.65, 53.35, 52.17, 36.04 (d, *J* = 70.8 Hz), 34.47 (d, *J* = 70.1 Hz), 29.71 (d, *J* = 90.5 Hz), 15.86. HRMS (EI) calculated for [C22H23NO2S]+: 365.1444 found: 365.1443. Enantiomeric excess was determined by HPLC with a Chiralpak IF column (hexanes:2-propanol = 90:10, 1.0 mL/min, 254 nm); major enantiomer Rt = 17.8 min, major enantiomer Rt = 21.6 min. [α]D20 = 45.3 (*c* = 0.3, CHCl3).

- 1. Synthesis of benzyl (1*R*,5*S*)-3-(4-((trifluoromethyl)thio)phenyl)-8-azabicyclo[3.2.1]oct-2-ene-8-carboxylate (**3k**).

Prepared according to typical procedure **B** from *N*-sulfonylhydrazone **1c** (162.0 mg, 0.3 mmol), after a flash column chromatography (hexanes:EA = 8:1) afforded the product **3k** as a yellow solid (103.3 mg, 82% yield) with 92% *ee*. Mp: 76-77 oC. 1H NMR (400 MHz, CDCl3) δ 7.59 (d, *J* = 8.1 Hz, 2 H), 7.38 – 7.26 (m, *J* = 20.0, 17.1, 9.9 Hz, 7 H), 6.53 (s, 1 H), 5.15 (d, *J* = 4.7 Hz, 2 H), 4.62 (s, 2 H), 3.10 (d, *J* = 65.8 Hz, 1 H), 2.24 (t, *J* = 12.6 Hz, 2 H), 2.10 – 1.99 (m, 2 H), 1.76 – 1.67 (m, 1 H). 13C NMR (101 MHz, CDCl3) δ 154.06, 142.27, 136.29, 132.90, 132.41, 131.05, 130.56, 130.11, 129.88 (qm, *J*F = 428.2 Hz), 128.44, 127.85 (d, *J* = 15.1 Hz), 125.84, 66.77, 53.36, 52.11, 35.92 (d, *J* = 71.4 Hz), 34.37 (d, *J* = 70.0 Hz), 29.75 (d, *J* = 90.6 Hz). 19F NMR (376 MHz, CDCl3) δ -42.84. HRMS (ESI) calculated for [M+Na]+ = [C22H20F3NNaO2]+: 442.1060 found: 442.1069. Enantiomeric excess was determined by HPLC with a Chiralpak IA column (hexanes:2-propanol = 90:10, 1.0 mL/min, 254 nm); major enantiomer Rt = 11.7 min, minor enantiomer Rt = 15.1 min. [α]D20 = 43.6 (*c* = 0.3, CHCl3).

- 1. Synthesis of benzyl (1*R*,5*S*)-3-(4-(dimethylamino)phenyl)-8-azabicyclo[3.2.1]oct-2-ene-8-carboxylate (**3l**).

Prepared according to typical procedure **A** from *N*-sulfonylhydrazone **1c** (162.0 mg, 0.3 mmol), after a flash column chromatography (hexanes:EA = 6:1) afforded the product **3l** as a yellow solid (76.4 mg, 70% yield) with 85% *ee*. Mp: 117-119 oC. 1H NMR (400 MHz, CDCl3) δ 7.38 – 7.26 (m, 7 H), 6.72 – 6.68 (m, 2 H), 6.32 (s, 1 H), 5.16 (d, *J* = 4.8 Hz, 2 H), 4.61 (s, 2 H), 3.22 – 3.03 (m, 1 H), 2.96 (s, 6 H), 2.25 (t, *J* = 13.7 Hz, 2 H), 2.08 – 1.98 (m, 2 H), 1.75 (dd, *J* = 12.9, 7.5 Hz, 1 H). 13C NMR (101 MHz, CDCl3) δ 153.97, 149.94, 136.95, 133.14, 132.64, 128.33, 127.75 (d, *J* = 7.7 Hz), 125.44, 124.68, 124.21, 112.18, 66.51, 53.39, 52.24, 40.43, 36.07 (d, *J* = 71.8 Hz), 34.60 (d, *J* = 68.8 Hz), 29.65 (d, *J* = 91.5 Hz). HRMS (ESI) calculated for [M+Na]+ = [C23H26N2NaO2]+: 385.1887 found: 385.1888. Enantiomeric excess was determined by HPLC with a Chiralpak ADH column (hexanes:2-propanol = 90:10, 1.0 mL/min, 254 nm); major enantiomer Rt = 14.6 min, minor enantiomer Rt = 16.6 min. [α]D20 = 59.6 (*c* = 0.3, CHCl3).

- 1. Synthesis of benzyl (1*R*,5*S*)-3-(4-fluorophenyl)-8-azabicyclo[3.2.1]oct-2-ene-8-carboxylate (**3m**).

Prepared according to typical procedure **A** from *N*-sulfonylhydrazone **1c** (162.0 mg, 0.3 mmol), after a flash column chromatography (hexanes:EA = 8:1) afforded the product **3m** as a colorless oil (76.9 mg, 76% yield) with 90% *ee*. 1H NMR (400 MHz, CDCl3) δ 7.36 – 7.26 (m, 7 H), 6.99 (t, *J* = 8.7 Hz, 2 H), 6.37 (s, 1 H), 5.20 – 5.11 (m, 2 H), 4.60 (s, 2 H), 3.08 (dd, *J* = 69.6, 17.5 Hz, 1 H), 2.28 – 2.18 (m, 2 H), 2.08 – 1.92 (m, 2 H), 1.76 – 5.11 (m, 1 H). 13C NMR (101 MHz, CDCl3) δ 163.47, 161.02, 154.06, 136.88, 135.83, 128.43, 127.88, 126.49, 126.42, 115.23, 115.02, 66.71, 53.34, 52.17, 36.31 (d, *J* = 72.2 Hz), 34.48 (d, *J* = 68.5 Hz), 29.75 (d, *J* = 91.1 Hz). 19F NMR (376 MHz, CDCl3) δ -115.02. HRMS (EI) calculated for [C21H20FNO2]+: 337.1473 found: 337.1473. Enantiomeric excess was determined by HPLC with a Chiralpak IA column (hexanes: 2-propanol = 90:10, 1.0 mL/min, 254 nm); major enantiomer Rt = 10.3 min, minor enantiomer Rt = 12.0 min. [α]D20 = 42.0 (*c* = 0.3, CHCl3).

- 1. Synthesis of benzyl (1*R*,5*S*)-3-(4-chlorophenyl)-8-azabicyclo[3.2.1]oct-2-ene-8-carboxylate (**3n**).

Prepared according to typical procedure **A** from *N*-sulfonylhydrazone **1c** (162.0 mg, 0.3 mmol), after a flash column chromatography (hexanes:EA = 8:1) afforded the product **3n** as a white solid (80.7 mg, 76% yield) with 90% *ee*. Mp: 101-102 oC. 1H NMR (400 MHz, CDCl3) δ 7.34 – 7.23 (m, 9 H), 6.42 (d, *J* = 13.6 Hz, 1 H), 5.18 – 5.11 (m, 2 H), 4.60 (s, 2 H), 3.18 – 2.91 (m, 1 H), 2.21 (t, *J* = 15.1 Hz, 2 H), 2.09 – 1.94 (m, 2 H), 1.75 – 1.68 (m, 1 H). 13C NMR (101 MHz, CDCl3) δ 154.01, 138.13, 136.82, 133.12, 132.92, 128.89, 128.60, 128.40, 127.87, 127.71, 126.12, 66.69, 53.31, 52.11, 36.06 (d, *J* = 71.5 Hz), 34.41 (d, *J* = 68.2 Hz), 29.71 (d, *J* = 90.3 Hz). HRMS (EI) calculated for [C21H20ClNO2]+: 353.1177 found: 353.1180. Enantiomeric excess was determined by HPLC with a Chiralpak IA column (hexanes:2-propanol = 90:10, 0.3 mL/min, 210 nm); major enantiomer Rt = 11.3 min, minor enantiomer Rt = 13.9 min. [α]D20 = 44.2 (*c* = 0.3, CHCl3).

- 1. Synthesis of benzyl (1*R*,5*S*)-3-(4-(trifluoromethyl)phenyl)-8-azabicyclo[3.2.1]oct-2-ene-8-carboxylate (**3o**).

Prepared according to typical procedure **C** from *N*-sulfonylhydrazone **1c** (162.0 mg, 0.3 mmol), after a flash column chromatography (hexanes: EA = 8:1) afforded the product **3o** as a white solid (88.2 mg, 76% yield) with 94% *ee*. Mp: 94-95 oC. 1H NMR (400 MHz, CDCl3) δ 7.57 – 7.28 (m, 9 H), 6.53 (s, 1 H), 5.19 – 5.12 (m, 2 H), 4.64 (s, 2 H), 3.24 – 3.01 (m, 1 H), 2.25 (dd, *J* = 14.9, 8.2 Hz, 2 H), 2.11 – 1.97 (m, 2 H), 1.77 – 1.70 (m, 1 H). 13C NMR (101 MHz, CDCl3) δ 154.04, 143.19, 136.78, 133.02, 130.61, 129.32 (dm, *J*F = 32.3 Hz), 128.43, 127.92, 127.77, 124.13 (qm, *J*F = 270.0 Hz), 125.21 (tm, *J*F = 17.2 Hz), 125.12, 66.76, 53.33, 52.09, 36.02 (d, *J* = 68.2 Hz), 34.39 (d, *J* = 67.3 Hz), 29.75 (d, *J* = 89.7 Hz). 19F NMR (376 MHz, CDCl3) δ -62.51. HRMS (ESI) calculated for [M+Na]+ = [C22H20F3NNaO2]+: 410.1338 found: 410.1333. Enantiomeric excess was determined by HPLC with a Chiralpak IA column (hexanes:2-propanol = 90:10, 1.0 mL/min, 254 nm); major enantiomer Rt = 11.3 min, major enantiomer Rt = 15.3 min. [α]D20 = 61.6 (*c* = 0.3, CHCl3).

- 1. Synthesis of benzyl (1*R*,5*S*)-3-(4-(methoxycarbonyl)phenyl)-8-azabicyclo[3.2.1]oct-2-ene-8-carboxylate (**3p**).

Prepared according to typical procedure **C** from *N*-sulfonylhydrazone **1c** (162.0 mg, 0.3 mmol), after a flash column chromatography (hexanes:EA = 4:1) afforded the product **3p** as a white solid (83.2 mg, 74% yield) with 93% *ee*. Mp: 85-86 oC. 1H NMR (400 MHz, CDCl3) δ 7.97 (d, *J* = 8.1 Hz, 2 H), 7.39 – 7.26 (m, 7 H), 6.55 – 6.54 (m, 1 H), 5.18 – 5.11 (m, 2 H), 4.62 (s, 2 H), 3.90 (d, *J* = 1.5 Hz, 3 H), 3.11 (dd, *J* = 68.2, 17.0 Hz, 1 H), 2.24 (d, *J* = 16.7 Hz, 2 H), 2.08 – 1.95 (m, 2 H), 1.75 – 1.68 (m, 1 H). 13C NMR (101 MHz, CDCl3) δ 166.69, 153.94, 143.99, 136.71, 133.15, 132.65, 130.54, 130.11, 129.54, 128.82, 128.32, 127.80, 127.64, 124.63, 66.63, 53.28, 52.03, 51.91, 35.84 (d, *J* = 71.5 Hz), 34.27 (d, *J* = 68.9 Hz), 29.64 (d, *J* = 88.9 Hz). HRMS (ESI) calculated for [M+Na]+ = [C23H23NNaO4]+: 400.1519 found: 400.1515. Enantiomeric excess was determined by HPLC with a Chiralpak IA column (hexanes: 2-propanol = 85:15, 1.0 mL/min, 254 nm); major enantiomer Rt = 13.9 min, minor enantiomer Rt = 16.1 min. [α]D20 = 55.5 (*c* = 0.3, CHCl3).

- 1. Synthesis of benzyl (1*R*,5*S*)-3-(4-(trimethylsilyl)phenyl)-8-azabicyclo[3.2.1]oct-2-ene-8-carboxylate (**3q**).

Prepared according to typical procedure **A** from *N*-sulfonylhydrazone **1c** (162.0 mg, 0.3 mmol), after a flash column chromatography (hexanes:EA = 8:1) afforded the product **3q** as a white solid (111.3 mg, 95% yield) with 91% *ee*. Mp: 95-97 oC. 1H NMR (400 MHz, CDCl3) δ 7.52 – 7.49 (m, 2 H), 7.37 – 7.29 (m, 7 H), 6.49 (s, 1 H), 5.17 (d, *J* = 4.8 Hz, 2 H), 4.63 (s, 2 H), 3.15 (dd, *J* = 74.1, 17.2 Hz, 1 H), 2.27 (t, *J* = 13.3 Hz, 2 H), 2.10 – 1.98 (m, 2 H), 1.77 – 1.71 (m, 1 H), 0.29 (s, 9 H). 13C NMR (101 MHz, CDCl3) δ 154.02, 140.04, 139.65, 136.88, 133.82, 133.36, 128.39, 128.06, 127.82, 127.69, 124.14, 66.64, 53.39, 52.21, 36.01 (d, *J* = 69.9 Hz), 34.49 (d, *J* = 68.9 Hz), 29.71 (d, *J* = 91.2 Hz), -1.20. HRMS (EI) calculated for [C24H29NO2Si]+: 391.1962 found: 391.1962. Enantiomeric excess was determined by HPLC with a Chiralpak IA column (hexanes:2-propanol = 90:10, 1.0 mL/min, 254 nm); major enantiomer Rt = 7.5 min, minor enantiomer Rt = 8.3 min. [α]D20 = 49.1 (*c* = 0.3, CHCl3).

- 1. Synthesis of benzyl (1*R*,5*S*)-3-(4-vinylphenyl)-8-azabicyclo[3.2.1]oct-2-ene-8-carboxylate (**3r**).

Prepared according to typical procedure **A** from allyl ether *N*-sulfonylhydrazone **1c** (162.0 mg, 0.3 mmol), after a flash column chromatography (hexanes:EA = 8:1) afforded the product **3r** as a white solid (77.6 mg, 75% yield) with 90% *ee*. Mp: 87-89 oC. 1H NMR (400 MHz, CDCl3) δ 7.37 – 7.26 (m, 9 H), 6.70 (dd, *J* = 17.6, 10.9 Hz, 1 H), 6.46 (d, *J* = 11.7 Hz, 1 H), 5.75 (d, *J* = 17.6 Hz, 1 H), 5.24 (d, *J* = 10.9 Hz, 1 H), 5.15 (d, *J* = 4.2 Hz, 2 H), 4.61 (s, 2 H), 3.11 (dd, *J* = 69.6, 17.8 Hz, 1 H), 2.24 (dd, *J* = 19.3, 10.1 Hz, 2 H), 2.08 – 1.96 (m, 2 H), 1.77 – 1.69 (m, 1 H). 13C NMR (101 MHz, CDCl3) δ 154.03, 139.07, 136.88, 136.72, 136.30, 133.69, 133.15, 128.41, 127.84, 127.68, 126.14, 124.92, 113.70, 66.66, 53.38, 52.19, 36.05 (d, *J* = 70.2 Hz), 34.47 (d, *J* = 68.6 Hz), 29.71 (d, *J* = 90.3 Hz). HRMS (EI) calculated for [C23H23NO2]+: 345.1728 found: 345.1723. Enantiomeric excess was determined by HPLC with a Chiralpak IA column (hexanes:2-propanol = 90:10, 1.0 mL/min, 254 nm); major enantiomer Rt = 10.4 min, major enantiomer Rt = 11.9 min. [α]D20 = 33.9 (*c* = 0.3, CHCl3).

- 1. Synthesis of benzyl (1*R*,5*S*)-3-(m-tolyl)-8-azabicyclo[3.2.1]oct-2-ene-8-carboxylate (**3s**).

Prepared according to typical procedure **A** from *N*-sulfonylhydrazone **1c** (162.0 mg, 0.3 mmol), after a flash column chromatography (hexanes:EA= 8:1) afforded the product **3s** as a white solid (86.8 mg, 87% yield) with 90% *ee*. Mp: 54-56 oC. 1H NMR (400 MHz, CDCl3) δ 7.38 – 7.28 (m, 5 H), 7.24 – 7.15 (m, 3 H), 7.09 (d, *J* = 7.3 Hz, 1 H), 6.42 (s, 1 H), 5.16 (d, *J* = 3.6 Hz, 2 H), 4.61 (s, 2 H), 3.12 (dd, *J* = 71.4, 17.1 Hz, 1 H), 2.36 (s, 3 H), 2.28 – 2.20 (m, 2 H), 2.02 (m, 2 H), 1.74 (d, *J* = 11.1 Hz, 1 H). 13C NMR (101 MHz, CDCl3) δ 154.03, 139.73, 137.80, 136.90, 133.98, 133.45, 128.38, 128.19, 128.15, 127.80, 125.65, 121.98, 66.62, 53.37, 52.23, 36.21 (d, *J* = 71.8 Hz), 34.50 (d, *J* = 69.1 Hz), 29.72 (d, *J* = 92.4 Hz), 21.43. HRMS (EI) calculated for [C22H23NO2]+: 333.1723 found: 333.1725. Enantiomeric excess was determined by HPLC with a Chiralpak IA column (hexanes:2-propanol = 90:10, 1.0 mL/min, 254 nm); major enantiomer Rt = 8.1 min, minor enantiomer Rt = 9.0 min. [α]D20 = 26.7 (*c* = 0.3, CHCl3).

- 1. Synthesis of benzyl (1*R*,5*S*)-3-(3-(tert-butyl)phenyl)-8-azabicyclo[3.2.1]oct-2-ene-8-carboxylate (**3t**).

Prepared according to typical procedure **C** from *N*-sulfonylhydrazone **1c** (162.0 mg, 0.3 mmol), after a flash column chromatography (hexanes:EA= 8:1) afforded the product **3t** as a white solid (88.1 mg, 78% yield) with 91 % *ee*. Mp: 82-84 oC. 1H NMR (400 MHz, CDCl3) δ 7.40 – 7.25 (m, 8 H), 7.18 (d, *J* = 7.7 Hz, 1 H), 6.46 (s, 1 H), 5.17 (d, *J* = 5.5 Hz, 2 H), 4.63 (s, 2 H), 3.15 (dd, *J* = 79.9, 17.1 Hz, 1 H), 2.32 – 2.21 (m, 2 H), 2.10 – 1.98 (m, 2 H), 1.80 – 1.73 (m, 1 H), 1.35 (s, 9 H). 13C NMR (101 MHz, CDCl3) δ 154.01, 151.09, 139.36, 136.91, 134.28, 133.84, 128.39, 128.01, 127.81, 127.69, 124.56, 122.09, 121.71, 66.63, 53.39, 52.24, 36.25 (d, *J* = 68.4 Hz), 34.69, 34.18, 31.31, 29.72 (d, *J* = 94.3 Hz). HRMS (EI) calculated for [C25H29NO2]+: 375.2193 found: 375.2194. Enantiomeric excess was determined by HPLC with a Chiralpak ADH column (hexanes:2-propanol = 90:10, 1.0 mL/min, 254 nm); major enantiomer Rt = 13.1 min, minor enantiomer Rt = 13.8 min. [α]D20 = 49.8 (*c* = 0.3, CHCl3).

- 1. Synthesis of benzyl (1*R*,5*S*)-3-([1,1'-biphenyl]-3-yl)-8-azabicyclo[3.2.1]oct-2-ene-8-carboxylate (**3u**).

Prepared according to typical procedure **A** from *N*-sulfonylhydrazone **1c** (162.0 mg, 0.3 mmol), after a flash column chromatography (hexanes: EA = 8:1) afforded the product **3u** as a white solid (98.7 mg, 83% yield) with 90% *ee*. Mp: 151-152 oC. 1H NMR (400 MHz, CDCl3) δ 7.61 (dd, *J* = 8.9, 7.1 Hz, 3 H), 7.53 – 7.50 (m, 3 H), 7.44 – 7.31 (m, 8 H), 6.54 (d, *J* = 14.1 Hz, 1 H), 5.24 – 5.17 (m, 2 H), 4.67 (s, 2 H), 3.34 – 3.10 (m, 1 H), 2.32 (dd, *J* = 23.5, 13.8 Hz, 2 H), 2.08 – 2.01 (m, 2 H), 1.84 – 1.75 (m, 1 H). 13C NMR (101 MHz, CDCl3) δ 154.02, 141.30, 141.09, 140.20, 136.84, 133.87, 133.36, 128.68, 128.66, 128.36, 127.79, 127.27, 127.11, 126.25, 123.83, 123.78, 66.62, 53.36, 52.19, 36.20 (d, *J* = 71.5 Hz), 34.45 (d, *J* = 68.8 Hz), 29.70 (d, *J* = 91.3 Hz). HRMS (EI) calculated for [C27H25NO2]+: 395.1880 found: 395.1879. Enantiomeric excess was determined by HPLC with a Chiralpak IA column (hexanes:2-propanol = 90:10, 1.0 mL/min, 210 nm); major enantiomer Rt = 14.2 min, minor enantiomer Rt = 15.7 min. [α]D20 = 34.5(*c* = 0.3, CHCl3).

- 1. Synthesis of benzyl (1*R*,5*S*)-3-(3-methoxyphenyl)-8-azabicyclo[3.2.1]oct-2-ene-8-carboxylate (**3v**).

Prepared according to typical procedure **A** from *N*-sulfonylhydrazone **1c** (162.0 mg, 0.3 mmol), after a flash column chromatography (hexanes:EA = 6:1) afforded the product **3v** as a colorless oil (85.9 mg, 82% yield) with 90% *ee*. 1H NMR (400 MHz, CDCl3) δ 7.39 – 7.29 (m, 5 H), 7.25 (t, *J* = 8.0 Hz, 1 H), 6.97 – 6.81 (m, 3 H), 6.45 (s, 1 H), 5.17 (d, *J* = 4.0 Hz, 2 H), 4.63 – 4.62 (m, 2 H), 3.82 (s, 3 H), 3.13 (dd, *J* = 72.6, 17.0 Hz, 1 H), 2.28 – 2.21 (m, 2 H), 2.09 – 1.97 (m, *J* = 14.7, 11.7, 4.8 Hz, 2 H), 1.78 – 1.71 (m, 1 H). 13C NMR (101 MHz, CDCl3) δ 159.53, 141.18, 136.80, 133.70, 133.21, 129.16, 128.53, 128.32, 128.11, 127.68 (d, *J* = 14.3 Hz), 117.33, 112.62, 110.74, 66.56, 55.08, 53.27, 52.12, 36.12 (d, *J* = 69.6 Hz), 34.39 (d, *J* = 69.2 Hz), 29.63 (d, *J* = 91.4 Hz). HRMS (EI) calculated for [C22H23NO3]+: 349.1672 found: 349.1675. Enantiomeric excess was determined by HPLC with a Chiralpak IA column (hexanes:2-propanol = 90:10, 1.0 mL/min, 254 nm); major enantiomer Rt = 13.2 min, minor enantiomer Rt = 15.9 min. [α]D20 = 45.9 (*c* = 0.3, CHCl3).

- 1. Synthesis of benzyl (1*R*,5*S*)-3-(3-chlorophenyl)-8-azabicyclo[3.2.1]oct-2-ene-8-carboxylate (**3w**).

Prepared according to typical procedure **B** from *N*-sulfonylhydrazone **1c** (162.0 mg, 0.3 mmol), after a flash column chromatography (hexanes:EA = 8:1) afforded the product **3w** as a white solid (86.7 mg, 82% yield) with 91% *ee*. Mp: 80-82 oC. 1H NMR (400 MHz, CDCl3) δ 7.33 (dd, *J* = 12.0, 4.1 Hz, 6 H), 7.24 – 7.19 (m, 3 H), 6.45 (d, *J* = 13.4 Hz, 1 H), 5.18 – 5.11 (m, 2 H), 4.60 (s, 2 H), 3.08 (dd, *J* = 68.8, 17.0 Hz, 1 H), 2.26 – 2.18 (m, 2 H), 2.08 – 1.95 (m, 2 H), 1.75 – 1.66 (m, 1 H). 13C NMR (101 MHz, CDCl3) δ 154.06, 141.64, 136.82, 134.35,132.98, 132.49, 129.52, 129.27, 128.44, 127.91, 127.37, 125.17, 123.02, 66.74, 53.32, 52.13, 36.07 (d, *J* = 70.4 Hz), 34.42 (d, *J* = 69.3 Hz), 29.74 (d, *J* = 88.7 Hz). HRMS (EI) calculated for [C21H20ClNO2]+: 353.1177 found: 353.1181. Enantiomeric excess was determined by HPLC with a Chiralpak IA column (hexanes:2-propanol = 90:10, 1.0 mL/min, 254 nm); major enantiomer Rt = 9.8 min, minor enantiomer Rt = 11.6 min. [α]D20 = 41.9 (*c* = 0.3, CHCl3).

- 1. Synthesis of benzyl (1*R*,5*S*)-3-(3-fluorophenyl)-8-azabicyclo[3.2.1]oct-2-ene-8-carboxylate (**3x**).

Prepared according to typical procedure **B** from *N*-sulfonylhydrazone **1c** (162.0 mg, 0.3 mmol), after a flash column chromatography (hexanes:Et2O = 8:1) afforded the product **3x** as a colorless oil (81.4 mg, 81% yield) with 91% *ee*. 1H NMR (400 MHz, CDCl3) δ 7.35 – 7.24 (m, 6 H), 7.12 (s, 1 H), 7.02 (d, *J* = 10.7 Hz, 1 H), 6.94 (td, *J* = 8.3, 2.5 Hz, 1 H), 6.46 (s, 1 H), 5.18 – 5.11 (m, 2 H), 4.61 (s, 2 H), 3.08 (d, *J* = 61.8 Hz, 1 H), 2.23 (t, *J* = 14.1 Hz, 2 H), 2.09 – 1.96 (m, 2 H), 1.76 – 1.68 (m, 1 H). 13C NMR (101 MHz, CDCl3) δ 164.14, 161.71, 154.05, 142.07 (d, *J*F = 7.3 Hz), 136.83, 133.01, 129.70 (d, *J*F = 8.4 Hz), 129.07, 128.43, 127.90, 120.46 (d, *J*F = 2.7 Hz), 114.15 (d, *J*F = 21.4 Hz), 111.82 (d, *J*F = 22.2 Hz), 66.73, 53.30, 52.13, 36.07 (d, *J* = 70.2 Hz), 34.40 (d, *J* = 67.8 Hz), 29.73 (d, *J* = 89.4 Hz). 19F NMR (376 MHz, CDCl3) δ -113.39. HRMS (EI) calculated for [C21H20FNO2]+: 337.1473 found: 337.1475. Enantiomeric excess was determined by HPLC with a Chiralpak IA column (hexanes:2-propanol = 90:10, 1.0 mL/min, 254 nm); minor enantiomer Rt = 10.1 min, major enantiomer Rt = 12.0 min. [α]D20 = 54.5 (*c* = 0.3, CHCl3).

- 1. Synthesis of benzyl (1*R*,5*S*)-3-(3-(methoxycarbonyl)phenyl)-8-azabicyclo[3.2.1]oct-2-ene-8-carboxylate (**3y**).

Prepared according to typical procedure **C** from *N*-sulfonylhydrazone **1c** (162.0 mg, 0.3 mmol), after a flash column chromatography (hexanes: EA = 4:1) afforded the product **3y** as a colorless oil (78.7 mg, 70% yield) with 91% *ee*. 1H NMR (400 MHz, CDCl3) δ 8.02 (s, 1 H), 7.92 (d, *J* = 7.7 Hz, 1 H), 7.51 (d, *J* = 7.9 Hz, 1 H), 7.39 – 7.26 (m, 6 H), 6.50 (d, *J* = 12.7 Hz, 1 H), 5.15 – 5.14 (m, 2 H), 4.61 (s, 2 H), 3.91 (d, *J* = 1.8 Hz, 3 H), 3.24 – 3.19 (m, 1 H), 2.27 (d, *J* = 16.8 Hz, 2 H), 2.08– 1.96 (m, 2 H), 1.76 – 1.69 (m, 1 H). 13C NMR (101 MHz, CDCl3) δ 166.88, 153.96, 139.95, 136.76,133.13, 130.14, 129.19, 128.81, 128.37, 128.33, 128.33, 127.78, 127.64, 125.96, 66.62, 53.26, 52.08, 52.01, 36.02 (d, *J* = 70.4 Hz), 34.34 (d, *J* = 69.3 Hz), 29.65 (d, *J* = 88.7 Hz). HRMS (EI) calculated for [C23H23NO4]+: 377.1622 found: 377.1623. Enantiomeric excess was determined by HPLC with a Chiralpak IA column (hexanes:2-propanol = 85:15, 1.0 mL/min, 254 nm); major enantiomer Rt = 15.1 min, minor enantiomer Rt = 16.6 min. [α]D20 = 43.3 (*c* = 0.5, CHCl3).

- 1. Synthesis of benzyl (1*R*,5*S*)-3-(o-tolyl)-8-azabicyclo[3.2.1]oct-2-ene-8-carboxylate (**3z**).

Prepared according to typical procedure **A** from *N*-sulfonylhydrazone **1c** (162.0 mg, 0.3 mmol), after a flash column chromatography (hexanes:EA = 8:1) afforded the product **3z** as a colorless oil (55.7 mg, 56% yield) with 84% *ee*. 1H NMR (400 MHz, CDCl3) δ 7.43 – 7.31 (m, 5 H), 7.19 – 7.12 (m, 3 H), 6.98 (d, *J* = 6.7 Hz, 1 H), 5.89 (d, *J* = 9.9 Hz, 1 H), 5.29 – 5.13 (m, 2 H), 4.60 – 4.49 (m, 2 H), 3.10 – 2.88 (m, 1 H), 2.29 (dd, *J* = 12.7, 7.3 Hz, 1 H), 2.23 (s, 3 H), 2.11 – 1.98 (m, 3 H), 1.86 (dt, *J* = 15.7, 8.3 Hz, 1 H). 13C NMR (101 MHz, CDCl3) δ 154.22, 141.31, 136.94, 135.95 (d, *J* = 60.8 Hz), 134.84, 130.66, 130.50 (d, *J* = 32.8 Hz), 128.39, 128.03, 127.84, 126.93, 125.52, 116.83, 66.61, 53.26, 52.47, 39.06 (d, *J* = 83.1 Hz), 34.73 (d, *J* = 70.3 Hz), 29.92 (d, *J* = 88.9 Hz), 19.43. HRMS (EI) calculated for [C22H23NO2]+: 333.1723 found: 333.1725. Enantiomeric excess was determined by HPLC with a Chiralpak IA column (hexanes: 2-propanol = 90:10, 1.0 mL/min, 254 nm); major enantiomer Rt = 7.4 min, minor enantiomer Rt = 7.7 min. [α]D20 = 26.1 (c = 0.3, CHCl3).

- 1. Synthesis of benzyl (1*R*,5*S*)-3-(2-methoxyphenyl)-8-azabicyclo[3.2.1]oct-2-ene-8-carboxylate (**3ba**).

Prepared according to typical procedure **A** from *N*-sulfonylhydrazone **1c** (162.0 mg, 0.3 mmol), after a flash column chromatography (hexanes:EA = 6:1) afforded the product **3ba** as a colorless oil (63.9 mg, 61% yield) with 86% *ee*. 1H NMR (400 MHz, CDCl3) δ 7.40 – 7.21 (m, 6 H), 7.07 (s, 1 H), 6.92 – 6.84 (m, 2 H), 6.08 (s, 1 H), 5.19 (d, *J* = 9.3 Hz, 2 H), 4.53 (d, *J* = 33.9 Hz, 2 H), 3.78 (s, 3 H), 3.06 (dd, *J* = 59.3, 17.5 Hz, 1 H), 2.26 (dd, *J* = 31.3, 13.8 Hz, 2 H), 2.08 – 1.98 (m, 2 H), 1.87 (s, 1 H).13C NMR (101 MHz, CDCl3) δ 156.88, 154.05, 137.08, 134.70, 130.71, 130.28, 129.91, 129.24, 128.37, 127.74, 127.63, 120.53, 110.90, 66.50, 55.36, 53.45, 52.49, 37.64 (d, *J* = 65.3 Hz), 34.81 (d, *J* = 68.9 Hz), 29.46 (d, *J* = 88.2 Hz). HRMS (ESI) calculated for [M+Na]+ = [C22H23NNaO3]+: 372.1577 found: 372.1570. Enantiomeric excess was determined by HPLC with a Chiralpak IA column (hexanes:2-propanol = 90:10, 1.0 mL/min, 254 nm); major enantiomer Rt = 8.9 min, minor enantiomer Rt = 9.9 min. [α]D20 = 25.0 (c = 0.3, CHCl3).

- 1. Synthesis of benzyl (1*R*,5*S*)-3-(3,4-dimethylphenyl)-8-azabicyclo[3.2.1]oct-2-ene-8-carboxylate (**3bb)**.

Prepared according to typical procedure **A** from *N*-sulfonylhydrazone **1c** (162.0 mg, 0.3 mmol), after a flash column chromatography (hexanes: EA = 10:1) afforded the product **3bb** as a colorless oil (77.7 mg, 75% yield) with 90% *ee*. 1H NMR (400 MHz, CDCl3) δ 7.38 – 7.26 (m, 5 H), 7.11 (d, *J* = 19.4 Hz, 3 H), 6.39 (d, *J* = 13.0 Hz, 1 H), 5.15 (d, *J* = 3.5 Hz, 2 H), 4.60 (s, 2 H), 3.11 (dd, *J* = 70.7, 17.0 Hz, 1 H), 2.26 (d, *J* = 4.2 Hz, 7 H), 2.05 – 1.98 (m, 2 H), 1.77 – 1.73 (m, 1 H). 13C NMR (101 MHz, CDCl3) δ 154.04, 137.40, 136.94, 136.33, 135.85, 133.83, 129.55, 128.39, 127.79, 127.35, 126.92, 126.17, 122.28, 66.60, 53.39, 52.25, 36.24 (d, *J* = 72.1 Hz), 34.55 (d, *J* = 69.3 Hz), 29.72 (d, *J* = 90.6 Hz), 19.81, 19.34. HRMS (EI) calculated for [C23H25NO2]+: 347.1880 found: 347.1880. Enantiomeric excess was determined by HPLC with a Chiralpak IF column (hexanes:2-propanol = 90:10, 1.0 mL/min, 254 nm); major enantiomer Rt = 9.9 min, minor enantiomer Rt = 11.1 min. [α]D20 = 48.3 (c = 0.3, CHCl3).

- 1. Synthesis of benzyl (1*R*,5*S*)-3-(4-fluoro-3-methylphenyl)-8-azabicyclo[3.2.1]oct-2-ene-8-carboxylate (**3bc)** .

Prepared according to typical procedure **A** from *N*-sulfonylhydrazone **1c** (162.0 mg, 0.3 mmol), after a flash column chromatography (hexanes: EA = 8:1) afforded the product **3bc** as a white solid (72.3 mg, 69% yield) with 92% *ee*. Mp: 77-79 oC. 1H NMR (400 MHz, CDCl3) δ 7.37 – 7.26 (m, 5 H), 7.16 – 7.0 (m, 2 H), 6.93 (t, *J* = 8.9 Hz, 1 H), 6.34 (s, 1 H), 5.19 – 5.12 (m, 2 H), 4.60 (s, 2 H), 3.07 (dd, *J* = 70.4, 17.1 Hz, 1 H), 2.27 – 2.18 (m, 5 H), 2.08 – 1.95 (m, 2 H), 1.82 – 1.69 (m, 1 H). 13C NMR (101 MHz, CDCl3) δ 162.00, 159.56, 154.03, 136.88, 135.58 (d, *J*F = 3.6 Hz), 133.17, 132.61, 128.39, 128.04, 127.99, 127.83, 127.72, 124.43 (d, *J*F = 17.5 Hz), 123.76 (d, *J*F = 7.9 Hz), 114.70 (d, *J*F = 22.4 Hz), 66.64, 53.33, 52.17, 36.32 (d, *J* = 72.9 Hz), 34.47 (d, *J* = 67.9 Hz), 29.71 (d, *J* = 90.4 Hz), 14.57 (d, *J* = 3.4 Hz). 19F NMR (376 MHz, CDCl3) δ -119.27.HRMS (EI) calculated for [C22H22FNO2]+: 351.1629 found: 351.1633. Enantiomeric excess was determined by HPLC with a Chiralpak IA column (hexanes: 2-propanol = 90:10, 1.0 mL/min, 254 nm); major enantiomer Rt = 8.7 min, minor enantiomer Rt = 10.4 min. [α]D20 = 41.9 (c = 0.3, CHCl3).

- 1. Synthesis of benzyl (1*R*,5*S*)-3-(4-fluoro-3-methoxyphenyl)-8-azabicyclo[3.2.1]oct-2-ene-8-carboxylate (**3bd**).

Prepared according to typical procedure **A** from *N*-sulfonylhydrazone **1c** (162.0 mg, 0.3 mmol), after a flash column chromatography (hexanes:EA = 7:1) afforded the product **3bd** as a white solid (76.0 mg, 69% yield) with 93% *ee*. Mp: 74-76 oC. 1H NMR (400 MHz, CDCl3) δ 7.36 – 7.25 (m, 5 H), 7.02 – 6.92 (m, 2 H), 6.84 (s, 1 H), 6.38 – 6.36 (m, 1 H), 5.22 – 5.12 (m, 2 H), 4.61 (s, 2 H), 3.88 (s, 3 H), 3.20 – 2.97 (m, 1 H), 2.24 (d, *J* = 8.5 Hz, 2 H), 2.08 – 1.96 (m, 2 H), 1.73 (dt, *J* = 12.9, 8.0 Hz, 1 H). 13C NMR (101 MHz, CDCl3) δ 153.91, 153.07, 150.63, 147.20 (d, *J*F = 10.9 Hz), 136.74, 136.32 (d, *J*F = 3.7 Hz), 133.16, 132.71, 128.29, 127.67 (d, *J* = 16.1 Hz), 117.33 (d, *J*F = 6.6 Hz), 115.53 (d, *J*F = 18.5 Hz), 110.24, 66.56, 56.08, 53.21, 52.04, 36.20 (d, *J* = 70.1 Hz), 34.33 (d, *J* = 68.6 Hz), 29.59 (d, *J* = 91.5 Hz). HRMS (EI) calculated for [C22H22FNO3]+: 367.1578 found: 367.1578. 19F NMR (376 MHz, CDCl3) δ -136.52 (d, *J* = 13.0 Hz). Enantiomeric excess was determined by HPLC with a Chiralpak IF column (hexanes:2-propanol = 90:10, 1.0 mL/min, 254 nm); major enantiomer Rt = 15.2 min, minor enantiomer Rt = 19.0 min. [α]D20 = 19.3 (c = 0.3, CHCl3).

- 1. Synthesis of benzyl (1*R*,5*S*)-3-(2-fluoro-[1,1'-biphenyl]-4-yl)-8-azabicyclo[3.2.1]oct-2-ene-8-carboxylate (**3be**).

Prepared according to typical procedure **C** from *N*-sulfonylhydrazone **1c** (162.0 mg, 0.3 mmol), after a flash column chromatography (hexanes:EA = 8:1) afforded the product **3be** as a white solid (82.6 mg, 67% yield) with 94% *ee*. Mp: 97-98 oC. 1H NMR (400 MHz, CDCl3) δ 7.58 – 7.55 (m, 2 H), 7.48 – 7.30 (m, 9 H), 7.21 (dd, *J* = 8.1, 1.8 Hz, 1 H), 7.14 (d, *J* = 12.5 Hz, 1 H), 6.54 (d, *J* = 14.1 Hz, 1 H), 5.17 (d, *J* = 4.2 Hz, 2 H), 4.65 (s, 2 H), 3.25 – 3.03 (m, 1 H), 2.26 (d, *J* = 17.1 Hz, 2 H), 2.11 – 1.98 (m, 2 H), 1.75 (d, *J* = 11.2 Hz, 1 H). 13C NMR (101 MHz, CDCl3) δ 160.93, 158.47, 154.03, 140.87 (d, *J*F = 7.9 Hz), 136.80, 135.41 (d, *J*F = 1.4 Hz), 132.61, 130.39 (d, *J*F = 4.2 Hz), 129.45, 128.83, 128.80, 128.41, 127.89, 127.71, 127.63, 120.66 (d, *J*F = 3.2 Hz), 112.45 (d, *J*F = 24.0 Hz), 66.73, 53.32, 52.12, 35.97 (d, *J* = 71.5 Hz), 34.41 (d, *J* = 67.5 Hz), 29.74 (d, *J* = 89.3 Hz). 19F NMR (376 MHz, CDCl3) δ -118.10 (d, *J* = 12.6 Hz). HRMS (EI) calculated for [C27H24FNO2]+: 413.1786 found: 413.1787. Enantiomeric excess was determined by HPLC with a Chiralpak IA column (hexanes:2-propanol = 90:10, 1.0 mL/min, 254 nm); major enantiomer Rt = 12.9 min, minor enantiomer Rt = 15.9 min. [α]D20 = 53.0 (c = 0.3, CHCl3).

- 1. Synthesis of benzyl (1*R*,5*S*)-3-(3-fluoro-4-methoxyphenyl)-8-azabicyclo[3.2.1]oct-2-ene-8-carboxylate(**3bf**).

Prepared according to typical procedure **A** from *N*-sulfonylhydrazone **1c** (162.0 mg, 0.3 mmol), after a flash column chromatography (hexanes:EA = 8:1) afforded the product **3bf** as a white solid (75.0 mg, 68% yield) with 89% *ee*. Mp: 91-93 oC. 1H NMR (400 MHz, CDCl3) δ 7.34 – 7.28 (m, 5 H), 7.09 – 7.02 (m, 2 H), 6.91 – 6.85 (m, 1 H), 6.35 (s, 1 H), 5.13 (t, *J* = 4.1 Hz, 2 H), 4.58 (s, 2 H), 3.87 (d, *J* = 4.6 Hz, 3 H), 3.04 (d, *J* = 62.6 Hz, 1 H), 2.17 (dd, *J* = 17.1, 4.6 Hz, 2 H), 2.04 – 1.95 (m, 2 H), 1.72 (d, *J* = 9.5 Hz, 1 H). 13C NMR (101 MHz, CDCl3) δ 153.72 (d, *J*F = 58.3 Hz), 150.99, 146.93 (d, *J*F = 11.1 Hz), 136.77 (d, *J*F = 16.0 Hz), 133.02 (d, *J*F = 16.1 Hz), 128.32 (d, *J*F = 15.9 Hz), 127.85, 127.69, 120.44, 120.28, 113.00 (d, *J*F = 16.2 Hz), 112.64 (d, *J*F = 16.1 Hz), 112.38, 66.66, 56.27, 53.29, 52.12, 36.00 (d, *J* = 67.2 Hz), 34.36 (d, *J* = 60.5 Hz), 29.61 (d, *J* = 83.3 Hz). 19F NMR (376 MHz, CDCl3) δ -135.36. HRMS (EI) calculated for [C22H22FNO3]+: 367.1578 found: 367.1581. Enantiomeric excess was determined by HPLC with a Chiralpak IA column (hexanes: 2-propanol = 90:10, 1.0 mL/min, 254 nm); major enantiomer Rt = 14.7 min, minor enantiomer Rt = 18.9 min. [α]D20 = 50.0 (c = 0.3, CHCl3).

- 1. Synthesis of benzyl (1*R*,5*S*)-3-(3,5-dimethylphenyl)-8-azabicyclo[3.2.1]oct-2-ene-8-carboxylate (**3bg**).

Prepared according to typical procedure **A** from *N*-sulfonylhydrazone **1c** (162.0 mg, 0.3 mmol), after a flash column chromatography (hexanes:EA = 10:1) afforded the product **3bg** as a white solid (92.0 mg, 88% yield) with 94% *ee*. Mp: 90-92 oC. 1H NMR (400 MHz, CDCl3) δ 7.38 – 7.26 (m, 5 H), 6.94 (d, *J* = 21.6 Hz, 3 H), 6.39 (s, 1 H), 5.15 (d, *J* = 3.4 Hz, 2 H), 4.60 (s, 2 H), 3.11 (dd, *J* = 71.7, 17.1 Hz, 1 H), 2.32 (s, 6 H), 2.34 – 2.20 (m, 2 H), 2.08 – 1.95 (m, 2 H), 1.80 – 1.72 (m, 1 H). 13C NMR (101 MHz, CDCl3) δ 154.06, 139.84, 137.73, 136.95, 134.12, 129.05, 128.40, 128.09, 127.80, 127.69, 122.85, 66.61, 53.40, 52.27, 36.32 (d, *J* = 72.8 Hz), 34.53 (d, *J* = 70.7 Hz), 29.72 (d, *J* = 92.0 Hz), 21.31. HRMS (EI) calculated for [C23H25NO2]+: 347.1880 found: 347.1881. Enantiomeric excess was determined by HPLC with a Chiralpak IF column (hexanes:2-propanol = 90:10, 1.0 mL/min, 254 nm); major enantiomer Rt = 9.1 min, minor enantiomer Rt = 10.3 min. [α]D20 = 67.1 (c = 0.5, CHCl3).

- 1. Synthesis of benzyl (1*R*,5*S*)-3-(3,5-dimethoxyphenyl)-8-azabicyclo[3.2.1]oct-2-ene-8-carboxylate (**3bh**).

Prepared according to typical procedure **B** from *N*-sulfonylhydrazone **1c** (162.0 mg, 0.3 mmol), after a flash column chromatography (hexanes:EA = 4:1) afforded the product **3bh** as a white solid (89.6 mg, 79% yield) with 92% *ee*. Mp: 130-132 oC. 1H NMR (400 MHz, CDCl3) δ 7.37 – 7.26 (m, 5 H), 6.50 (d, *J* = 2.2 Hz, 1 H), 6.44 (s, 1 H), 6.39 (t, *J* = 2.3 Hz, 2 H), 5.15 (d, *J* = 4.1 Hz, 2 H), 4.60 (s, 2 H), 3.79 (s, 6 H), 3.09 (dd, *J* = 74.3, 17.0 Hz, 1 H), 2.22 (d, *J* = 17.2 Hz, 2 H), 2.08 – 1.96 (m, 2 H), 1.74 (m, 1 H). 13C NMR (101 MHz, CDCl3) δ 160.67, 153.98, 142.00, 136.84, 133.41, 128.81, 128.38, 127.81, 127.67, 103.34, 99.35, 66.63, 55.26, 53.29, 52.16, 36.27 (d, *J* = 66.9 Hz), 34.45 (d, *J* = 68.8 Hz), 29.68 (d, *J* = 92.6 Hz). HRMS (EI) calculated for [C23H25NO4]+: 379.1778 found: 379.1779. Enantiomeric excess was determined by HPLC with a Chiralpak IA column (hexanes:2-propanol = 80:20, 1.0 mL/min, 254 nm); major enantiomer Rt = 10.5 min, minor enantiomer Rt = 12.4 min. [α]D20 = 52.1 (c = 0.3, CHCl3).

- 1. Synthesis of benzyl (1*R*,5*S*)-3-(3,5-difluorophenyl)-8-azabicyclo[3.2.1]oct-2-ene-8-carboxylate (**3bi**).

Prepared according to typical procedure **C** from *N*-sulfonylhydrazone **1c** (162.0 mg, 0.3 mmol), after a flash column chromatography (hexanes: EA =8:1) afforded the product **3bi** as a colorless oil (82.0 mg, 77% yield) with 90% *ee*.1H NMR (400 MHz, CDCl3) δ 7.33 (dd, *J* = 11.7, 4.1 Hz, 5 H), 6.83 (d, *J* = 8.0 Hz, 2 H), 6.71 – 6.66 (m, 1 H), 6.48 (s, 1 H), 5.18 – 5.11 (m, 2 H), 4.61 (s, 2 H), 3.15 – 2.94 (m, 1 H), 2.20 (dd, *J* = 37.5, 13.9 Hz, 2 H), 2.08 – 1.95 (m, 2 H), 1.74 – 1.67 (m, 1 H). 13C NMR (101 MHz, CDCl3) δ 164.24 (d, *J*F = 13.2 Hz), 161.78 (d, *J*F = 13.3 Hz), 154.02, 143.12 (t, *J*F = 9.2 Hz), 136.73, 132.29, 130.39 (d, *J* = 41.1 Hz), 128.43, 127.86 (d, *J* = 15.9 Hz), 108.07 – 107.41 (m, *J*F = 66.7 Hz), 102.53 (t, *J*F = 25.6 Hz), 66.77, 53.21, 52.01, 35.89 (d, *J* = 70.9 Hz), 34.28 (d, *J* = 67.3 Hz), 29.70 (d, *J* = 88.4 Hz). 19F NMR (376 MHz, CDCl3) δ -110.19. HRMS (ESI) calculated for [M+Na]+ = [C21H19F2NNaO2]+: 378.1276 found: 378.1277. Enantiomeric excess was determined by HPLC with a Chiralpak IA column (hexanes: 2-propanol = 90:10, 1.0 mL/min, 254 nm); major enantiomer Rt = 9.7 min, major enantiomer Rt = 12.6 min. [α]D20 = 47.3 (c = 0.3, CHCl3).

- 1. Synthesis of benzyl (1*R*,5*S*)-3-(bicyclo[4.2.0]octa-1,3,5-trien-3-yl)-8-azabicyclo[3.2.1]oct-2-ene-8-carboxylate (**3bj**).

Prepared according to typical procedure **A** from *N*-sulfonylhydrazone **1c** (162.0 mg, 0.3 mmol), after a flash column chromatography (hexanes:EA = 8:1) afforded the product **3bj** as a white solid (86.2 mg, 83% yield) with 90% *ee*. Mp: 61-63 oC. 1H NMR (400 MHz, CDCl3) δ 7.35 (dd, *J* = 13.8, 4.2 Hz, 5 H), 7.19 (d, *J* = 7.7 Hz, 1 H), 7.06 – 7.00 (m, 2 H), 6.36 – 6.32 (m, 1 H), 5.17 (d, *J* = 3.1 Hz, 2 H), 4.61 (s, 2 H), 3.23 – 3.00 (m, 5 H), 2.27 – 2.20 (m, 2 H), 2.08 – 1.96 (m, 2 H), 1.78 – 1.71 (m, 1 H). 13C NMR (101 MHz, CDCl3) δ 153.94, 145.75, 145.16, 138.93, 136.90, 134.84, 128.36, 127.76, 127.69, 127.07, 123.73, 122.29, 119.21, 66.55, 53.36, 52.23, 36.55 (d, *J* = 71.2 Hz), 34.50 (d, *J* = 67.2 Hz), 30.09, 29.34, 29.27. HRMS (EI) calculated for [C23H23NO2]+: 345.1723 found: 345.1725. Enantiomeric excess was determined by HPLC with a Chiralpak IA column (hexanes:2-propanol = 90:10, 1.0 mL/min, 260 nm); major enantiomer Rt = 8.9 min, minor enantiomer Rt = 9.9 min. [α]D20 = 51.3 (*c* = 0.4, CHCl3).

- 1. Synthesis of benzyl benzyl (1*R*,5*S*)-3-(3-oxo-2,3-dihydro-1H-inden-5-yl)-8-azabicyclo[3.2.1]oct-2-ene-8-carboxylate (**3bk**).

Prepared according to typical procedure **B** from *N*-sulfonylhydrazone **1c** (162.0 mg, 0.3 mmol), after a flash column chromatography (hexanes:EA = 2:1) afforded the product **3bk** as a red solid (95.6 mg, 85% yield) with 90% *ee*. Mp: 115-117 oC. 1H NMR (400 MHz, CDCl3) δ 7.70 – 7.66 (m, 1 H), 7.59 (d, *J* = 8.0 Hz, 1 H), 7.41 (d, *J* = 8.1 Hz, 1 H), 7.34 – 7.26 (m, 5 H), 6.49 (s, 1 H), 5.13 (t, *J* = 2.3 Hz, 2 H), 4.61 (s, 2 H), 3.13 – 3.10 (m, 3 H), 2.72 – 2.68 (m, 2 H), 2.27 – 2.20 (m, 2 H), 2.08 – 1.95 (m, 2 H), 1.78 – 1.70 (m, 1 H). 13C NMR (101 MHz, CDCl3) δ 206.94, 154.25,154.01,139.26, 137.16, 136.78, 133.24, 131.46, 129.31, 129.01, 128.41, 127.88, 126.49, 119.63, 66.71, 53.31, 52.12, 36.53, 35.90(d, *J* = 70.4 Hz), 34.10(d, *J* = 69.3 Hz), 29.65(dm, *J* = 88.7 Hz), 25.49. HRMS (EI) calculated for [C24H23NO3]+: 373.1675 found: 373.1672. Enantiomeric excess was determined by HPLC with a Chiralpak IA column (hexanes: 2-propanol = 70:30, 1.0 mL/min, 254 nm); major enantiomer Rt = 11.8 min, minor enantiomer Rt = 15.2 min. [α]D20 = 32.0 (*c* = 0.5, CHCl3).

- 1. Synthesis of benzyl (1*R*,5*S*)-3-(benzo[d][1,3]dioxol-5-yl)-8-azabicyclo[3.2.1]oct-2-ene-8-carboxylate(**3bl**).

Prepared according to typical procedure **B** from *N*-sulfonylhydrazone **1c** (162.0 mg, 0.3 mmol), after a flash column chromatography (hexanes:EA = 6:1) afforded the product **3bl** as a white solid (91.5 mg, 84% yield) with 90% *ee*. Mp: 120-122 oC. 1H NMR (400 MHz, CDCl3) δ 7.37 – 7.26 (m, 5 H), 6.86 – 6.74 (m, 3 H), 6.31 (s, 1 H), 5.93 (s, 2 H), 5.15 (d, *J* = 3.7 Hz, 2 H), 4.59 (s, 2 H), 3.17 – 2.95 (m, 1 H), 2.27 – 2.16 (m, 2 H), 2.10 – 1.94 (m, 2 H), 1.75 – 1.68 (m, 1 H). 13C NMR (101 MHz, CDCl3) δ 153.94, 147.70, 146.90, 136.84, 134.12, 133.34, 128.34, 127.71 (d, *J* = 12.8 Hz), 127.17, 126.74, 118.29, 107.88, 105.36, 100.93, 66.57, 53.26, 52.12, 36.37 (d, *J* = 71.8 Hz), 34.44 (d, *J* = 68.1 Hz), 29.63 (d, *J* = 89.7 Hz). HRMS (EI) calculated for [C22H21NO4]+: 3631465 found: 363.1466. Enantiomeric excess was determined by HPLC with a Chiralpak IA column (hexanes:2-propanol = 90:10, 1.0 mL/min, 230 nm); major enantiomer Rt = 17.4 min, minor enantiomer Rt = 23.3 min. [α]D20 = 33.3 (c = 0.3, CHCl3).

- 1. Synthesis of benzyl (1*R*,5*S*)-3-(2,3-dihydrobenzo[b][1,4]dioxin-6-yl)-8-azabicyclo[3.2.1]oct-2-ene-8-carboxylate (**3bm**).

Prepared according to typical procedure **A** from *N*-sulfonylhydrazone **1c** (162.0 mg, 0.3 mmol), after a flash column chromatography (hexanes:EA = 6:1) afforded the product **3bm** as a white solid (92.5 mg, 82% yield) with 90% *ee*. Mp: 125-127 oC. 1H NMR (400 MHz, CDCl3) δ 7.36 – 7.26 (m, 5 H), 6.88 – 6.80 (m, 3 H), 6.33 (s, 1 H), 5.15 (d, *J* = 3.9 Hz, 2 H), 4.59 (s, 2 H), 4.23 (s, 4 H), 3.06 (dd, *J* = 65.4, 17.0 Hz, 1 H), 2.21 (dd, *J* = 14.5, 8.7 Hz, 2 H), 2.06 – 1.93 (m, 2 H), 1.71 (dt, *J* = 13.0, 8.0 Hz, 1 H). 13C NMR (101 MHz, CDCl3) δ 153.90, 143.14, 142.95, 136.82, 133.26, 132.95, 132.43, 128.30, 127.72, 127.59, 126.90, 126.50, 117.86, 116.86, 113.65, 66.51, 64.28, 64.21, 53.24, 52.10, 36.07 (d, *J* = 71.3 Hz), 34.41 (d, *J* = 68.7 Hz), 29.60 (d, *J* = 88.6 Hz). HRMS (EI) calculated for [C23H23NO4]+: 377.1622 found: 377.1622. Enantiomeric excess was determined by HPLC with a Chiralpak IA column (hexanes:2-propanol = 85:15, 1.0 mL/min, 254 nm); minor enantiomer Rt = 14.9 min, major enantiomer Rt = 17.8 min. [α]D20 = 11.3 (c = 0.3, CHCl3).

- 1. Synthesis of benzyl (1*R*,5*S*)-3-(5,5,8,8-tetramethyl-5,6,7,8-tetrahydronaphthalen-2-yl)-8-azabicyclo[3.2.1]oct-2-ene-8-carboxylate (**3bn**).

Prepared according to typical procedure **B** from *N*-sulfonylhydrazone **1c** (162.0 mg, 0.3 mmol), after a flash column chromatography (hexanes:EA = 8:1) afforded the product **3bn** as a white solid (116.3 mg, 90% yield) with 93% *ee*. Mp: 116-118 oC. 1H NMR (400 MHz, CDCl3) δ 7.40 – 7.26 (m, 7 H), 7.18 (d, *J* = 8.4 Hz, 1H), 6.46 (s, 1 H), 5.17 (d, *J* = 10.3 Hz, 2 H), 4.63 (s, 2 H), 3.15 (dd, *J* = 84.7, 17.1 Hz, 1 H), 2.28 (t, *J* = 17.4 Hz, 2 H), 2.07 – 1.98 (m, 2 H), 1.86 – 1.70(m, 5 H), 1.32 (d, *J* = 7.7 Hz, 12 H). 13C NMR (101 MHz, CDCl3) δ 154.01, 144.70, 144.34, 136.90, 136.62, 133.67, 133.22, 128.37, 127.78, 127.43, 126.89, 126.48, 122.67, 122.12, 66.60, 53.38, 52.23, 36.00 (d, *J* = 68.8 Hz), 35.11, 34.94, 34.26, 34.03, 31.80, 31.78, 31.72, 29.68 (d, *J* = 94.9 Hz). HRMS (EI) calculated for [C29H35NO2]+: 429.2665 found: 429.2662. Enantiomeric excess was determined by HPLC with a Chiralpak IF column (hexanes: 2-propanol = 90:10, 1.0 mL/min, 254 nm); major enantiomer Rt = 7.1 min, minor enantiomer Rt = 7.5 min. [α]D20 = 37.4 (c = 0.3, CHCl3).

- 1. Synthesis of benzyl (1*R*,5*S*)-3-(9,9-dimethyl-9H-fluoren-3-yl)-8-azabicyclo[3.2.1]oct-2-ene-8-carboxylate (**3bo**).

Prepared according to typical procedure **B** from *N*-sulfonylhydrazone **1c** (162.0 mg, 0.3 mmol), after a flash column chromatography (hexanes: EA = 8:1) afforded the product **3bo** as a colorless oil (117.9 mg, 90% yield) with 91% *ee*. 1H NMR (400 MHz, CDCl3) δ 7.76 – 7.67 (m, 2 H), 7.47 – 7.29 (m, 10 H), 6.58 – 6.54 (m, 1 H), 5.20 (d, *J* = 5.4 Hz, 2 H), 4.67 (s, 2 H), 3.23 (dd, *J* = 80.6, 16.9 Hz, 1 H), 2.33 (dd, *J* = 32.7, 13.6 Hz, 2 H), 2.13 – 2.00 (m, 2 H), 1.84 – 1.77 (m, 1 H), 1.52 (s, 6 H). 13C NMR (101 MHz, CDCl3) δ 154.05, 153.77, 153.67, 138.80, 138.73, 138.62, 136.89, 134.08, 133.62, 128.38, 128.08, 127.79, 127.67, 127.15, 126.92, 123.83, 122.50, 119.91, 119.74, 118.90, 66.63, 53.43, 52.25, 46.76, 36.34 (d, *J* = 72.5 Hz), 34.50 (d, *J* = 69.8 Hz), 29.71 (d, *J* = 94.0 Hz), 27.13. HRMS (ESI) calculated for [M+Na]+ = [C30H29NNaO2]+: 458.2095 found: 458.2090. Enantiomeric excess was determined by HPLC with a Chiralpak IF column (hexanes: 2-propanol = 90:10, 1.0 mL/min, 254 nm); minor enantiomer Rt = 9.8 min, major enantiomer Rt = 10.9 min. [α]D20 = 14.2 (c = 0.3, CHCl3).

- 1. Synthesis of tert-butyl 3-((1*R*,5*S*)-8-((benzyloxy)carbonyl)-8-azabicyclo[3.2.1]oct-2-en-3-yl)-9H-carbazole-9-carboxylate (**3bp**).

Prepared according to typical procedure **A** from *N*-sulfonylhydrazone **1c** (162.0 mg, 0.3 mmol), after a flash column chromatography (hexanes:EA = 6:1) afforded the product **3bp** as a yellow oil (115.5 mg, 87% yield) with 90% *ee*. 1H NMR (400 MHz, CDCl3) δ 8.29 (dd, *J* = 26.6, 8.6 Hz, 2 H), 8.00 – 7.94 (m, 2 H), 7.51 – 7.47 (m, 2 H), 7.40 – 7.28 (m, 6 H), 6.55 (d, *J* = 15.1 Hz, 1 H), 5.20 (d, *J* = 3.7 Hz, 2 H), 4.69 (s, 2 H), 3.27 (dd, *J* = 75.7, 16.8 Hz, 1 H), 2.43 – 2.29 (m, 2 H), 2.14 – 2.03 (m, 2 H), 1.84 (d, *J* = 6.9 Hz, 1 H), 1.79 (s, 9 H). 13C NMR (101 MHz, CDCl3) δ 154.06, 150.88, 138.74, 137.81, 136.88, 134.84, 133.82, 133.33, 128.36, 127.78, 127.68, 127.06, 125.68, 125.63, 124.10, 122.95, 119.41, 116.22, 115.90, 115.72, 83.86, 66.61, 53.43, 52.26, 36.87, 34.51 (d, *J* = 69.8 Hz), 29.74 (d, *J* = 91.6 Hz), 28.29. HRMS (ESI) calculated for [M+Na]+ = [C32H32N2NaO4]+: 531.2257 found: 531.2254. Enantiomeric excess was determined by HPLC with a Chiralpak IA column (hexanes: 2-propanol = 85:15, 1.0 mL/min, 254 nm); major enantiomer Rt = 14.6 min, minor enantiomer Rt = 19.3 min. [α]D20 = 48.5 (c = 0.3, CHCl3).

- 1. Synthesis of benzyl (1*R*,5*S*)-3-(dibenzo[b,d]thiophen-2-yl)-8-azabicyclo[3.2.1]oct-2-ene-8-carboxylate (**3bq**).

Prepared according to typical procedure **B** from *N*-sulfonylhydrazone **1c** (162.0 mg, 0.3 mmol), after a flash column chromatography (hexanes: EA = 4:1) afforded the product **3bq** as a yellow solid (89.1 mg, 70% yield) with 92% *ee*. Mp: 91-92 oC. 1H NMR (400 MHz, CDCl3) δ 8.17 – 8.08 (m, 2 H), 7.86 – 7.76 (m, 2 H), 7.40 – 7.28 (m, 8 H), 6.54 (s, 1 H), 5.23 – 5.16 (m, 2 H), 4.68 (s, 2 H), 3.41 – 3.14 (m, 1 H), 2.34 (dd, *J* = 39.2, 14.2 Hz, 2 H), 2.14 – 2.02 (m, 2 H), 1.82 (dd, *J* = 13.3, 7.4 Hz, 1 H).13C NMR (101 MHz, CDCl3) δ 154.09, 139.80, 138.44, 136.88, 136.42, 135.59, 135.40, 133.89, 133.40, 128.41, 128.11, 127.85, 127.98 (d, *J* = 26.8 Hz), 124.33, 123.90, 122.83, 122.45, 121.45, 117.72, 66.68, 53.44, 52.26, 36.49 (d, *J* = 71.4 Hz), 34.51 (d, *J* = 69.3 Hz), 29.76 (d, *J* = 92.0 Hz). HRMS (ESI) calculated for [M+Na]+ = [C27H23NNaO2S]+: 448.1348 found: 448.1342. Enantiomeric excess was determined by HPLC with a Chiralpak ADH column (hexanes:2-propanol = 60:40, 1.0 mL/min, 254 nm); major enantiomer Rt = 14.6 min, minor enantiomer Rt = 22.5 min. [α]D20 = 21.9 (c = 0.3, CHCl3).

- 1. Synthesis of benzyl (1*R*,5*S*)-3-(benzofuran-5-yl)-8-azabicyclo[3.2.1]oct-2-ene-8-carboxylate (**3br**).

Prepared according to typical procedure **B** from *N*-sulfonylhydrazone **1c** (162.0 mg, 0.3 mmol), after a flash column chromatography (hexanes: EA = 8:1) afforded the product **3br** as a white solid (88.3 mg, 82% yield) with 92% *ee*. Mp: 62-64 oC. 1H NMR (400 MHz, CDCl3) δ 7.61 (d, *J* = 2.2 Hz, 1 H), 7.55 (d, *J* = 1.9 Hz, 1 H), 7.44 (d, *J* = 8.6 Hz, 1 H), 7.39 – 7.28 (m, 6 H), 6.75 (dd, *J* = 2.2, 0.9 Hz, 1 H), 6.42 (d, *J* = 12.8 Hz, 1 H), 5.18 (d, *J* = 3.2 Hz, 2 H), 4.64 (s, 2 H), 3.29 – 3.07 (m, 1 H), 2.34 – 2.22 (m, 2 H), 2.10 – 1.98 (m, 2 H), 1.81 – 1.73 (m, 1 H). 13C NMR (101 MHz, CDCl3) δ 154.40, 154.04, 145.37, 136.89, 134.99, 134.12, 133.57, 128.37, 127.79, 127.65, 127.40, 121.68, 117.47, 110.98, 106.63, 66.60, 53.39, 52.24, 36.72 (d, *J* = 73.3 Hz), 34.51 (d, *J* = 68.1 Hz), 29.71 (d, *J* = 90.0 Hz). HRMS (EI) calculated for [C23H21NO3]+: 359.1516 found: 359.1516. Enantiomeric excess was determined by HPLC with a Chiralpak IA column (hexanes:2-propanol = 90:10, 1.0 mL/min, 254 nm); major enantiomer Rt =12.8 min, minor enantiomer Rt = 14.4 min. [α]D20 = 87.0 (c = 0.3, CHCl3).

- 1. Synthesis of benzyl (1*R*,5*S*)-3-(benzo[b]thiophen-5-yl)-8-azabicyclo[3.2.1]oct-2-ene-8-carboxylate (**3bs**).

Prepared according to typical procedure **B** from *N*-sulfonylhydrazone **1c** (162.0 mg, 0.3 mmol), after a flash column chromatography (hexanes:EA = 8:1) afforded the product **3bs** as a yellow solid (90.0 mg, 80% yield) with 92% *ee*. Mp: 104-105 oC. 1H NMR (400 MHz, CDCl3) δ 7.82 – 7.76 (m, 2 H), 7.48 – 7.28 (m, 8 H), 6.49 (s, 1 H), 5.18 (d, *J* = 3.4 Hz, 2 H), 4.65 (s, 2 H), 3.20 (dd, *J* = 71.4, 17.0 Hz, 1 H), 2.36 – 2.23 (m, 2 H), 2.11 – 2.00 (m, 2 H), 1.81 – 1.74 (m, 1 H). 13C NMR (101 MHz, CDCl3) δ 139.75, 138.68, 136.87, 136.20, 133.42, 133.38, 128.38, 127.80, 127.67, 126.81, 123.92, 123.56, 122.13, 121.59, 119.73, 66.63, 53.40, 52.24, 36.81, 34.49 (d, *J* = 68.0 Hz), 29.49 (d, *J* = 41.9 Hz). HRMS (EI) calculated for [C23H21NO2S]+: 375.1288 found: 375.1287. Enantiomeric excess was determined by HPLC with a Chiralpak IF column (hexanes: 2-propanol = 90:10, 1.0 mL/min, 254 nm); major enantiomer Rt = 14.8 min, minor enantiomer Rt = 17.2 min. [α]D20 = 37.9 (c = 0.3, CHCl3).

- 1. Synthesis of benzyl (1*R*,5*S*)-3-(benzo[b]thiophen-6-yl)-8-azabicyclo[3.2.1]oct-2-ene-8-carboxylate (**3bt**).

Prepared according to typical procedure **B** from *N*-sulfonylhydrazone **1c** (162.0 mg, 0.3 mmol), after a flash column chromatography (hexanes:EA = 8:1) afforded the product **3bt** as a white solid (91.5 mg, 81% yield) with 94% *ee*. Mp: 98-100 oC. 1H NMR (400 MHz, CDCl3) δ 7.81 – 7.74 (m, 2 H), 7.42 – 7.29 (m, 8 H), 6.51 (d, *J* = 15.9 Hz, 1 H), 5.21 – 5.14 (m, 2 H), 4.65 (s, 2 H), 3.30 – 3.12 (m, 1 H), 2.30 (dd, *J* = 24.8, 13.6 Hz, 2 H), 2.11 – 1.73 (m, 2 H), 1.76 (p, *J* = 8.0 Hz, 1 H). 13C NMR (101 MHz, CDCl3) δ 154.05, 140.10, 138.79, 136.87, 136.11, 133.79, 133.23, 128.39, 128.21, 127.83, 126.57, 123.51, 123.18, 121.60, 118.58, 66.66, 53.43, 52.23, 36.38 (d, *J* = 69.8 Hz), 34.47 (d, *J* = 69.3 Hz), 29.90 (d, *J* = 53.8 Hz). HRMS (ESI) calculated for [M+Na]+ = [C23H21NNaO2S]+: 398.1185 found: 398.1185. Enantiomeric excess was determined by HPLC with a Chiralpak IA column (hexanes: 2-propanol = 90:10, 1.0 mL/min, 254 nm); major enantiomer Rt = 15.4 min, minor enantiomer Rt = 18.1 min. [α]D20 = 55.9 (c = 0.3, CHCl3).

- 1. Synthesis of tert-butyl 5-((1*R*,5*S*)-8-((benzyloxy)carbonyl)-8-azabicyclo[3.2.1]oct-2-en-3-yl)isoindoline-2-carboxylate (**3bu**).

Prepared according to typical procedure **A** from *N*-sulfonylhydrazone **1c** (162.0 mg, 0.3 mmol), after a flash column chromatography (hexanes:EA = 4:1) afforded the product **3bu** as a yellow solid (114.6 mg, 83% yield) with 90% *ee*.Mp: 74-75 oC. 1H NMR (400 MHz, CDCl3) δ 7.38 – 7.28 (m, 5 H), 7.26 – 7.14 (m, 3 H), 6.41 (s, 1 H), 5.19 – 5.10 (d, *J* = 3.0 Hz, 2 H), 4.64 (d, *J* = 16.6 Hz, 6 H), 3.09 (d, *J* = 58.2 Hz, 1 H), 2.25 – 2.20 (m, 2 H), 2.11 – 1.96 (m, 2 H), 1.72 (dt, *J* = 14.6, 7.9 Hz, 1 H), 1.52 (s, 9 H). 13C NMR (101 MHz, CDCl3) δ 153.99, 149.52, 136.88, 134.54, 134.50, 134.06, 133.54, 130.51, 128.33, 127.58, 127.14, 126.21, 121.46, 117.15, 114.74, 107.32, 66.54, 53.38, 52.24, 36.52 (d, *J* = 70.7 Hz), 34.49 (d, *J* = 68.0 Hz), 29.68 (d, *J* = 88.9 Hz), 28.07. HRMS (ESI) calculated for [M+Na]+ = [C28H32N2NaO4]+: 483.2248 found: 483.2254. Enantiomeric excess was determined by HPLC with a Chiralpak IA column (hexanes:2-propanol = 80:20, 1.0 mL/min, 254 nm); major enantiomer Rt = 12.3 min, minor enantiomer Rt = 13.8 min. [α]D20 = 23.0 (c = 0.3, CHCl3).

- 1. Synthesis of benzyl (1*R*,5*S*)-3-(pyridin-3-yl)-8-azabicyclo[3.2.1]oct-2-ene-8-carboxylate (**3bv**).

Prepared according to typical procedure **B** from *N*-sulfonylhydrazone **1c** (162.0 mg, 0.3 mmol), after a flash column chromatography (hexanes:EA = 2:1) afforded the product **3bv** as a yellow oil (58.0 mg, 60% yield) with 87% *ee*. 1H NMR (400 MHz, CDCl3) δ 8.57 – 8.45 (m, 2 H), 7.56 (dt, *J* = 8.1, 2.1 Hz, 1 H), 7.32 – 7.28 (m, 6 H), 6.46 (s, 1 H), 5.16 – 5.09 (m, 2 H), 4.60 (s, 2 H), 3.18 – 2.97 (m, 1 H), 2.20 (d, *J* = 16.8 Hz, 2 H), 2.07 – 1.97 (m, 2 H), 1.71 (dt, *J* = 12.8, 8.1 Hz, 1 H). 13C NMR (101 MHz, CDCl3) δ 153.88, 148.37, 146.34, 136.62, 134.92, 131.93, 131.26, 130.78, 129.83 (d, *J* = 38.7 Hz), 128.28, 127.69 (d, *J* = 17.3 Hz), 122.96, 66.60, 53.18, 51.92, 35.63 (d, *J* = 70.5 Hz), 34.99 – 33.46 (dm, *J* = 53.5 Hz), 29.59 (d, *J* = 88.2 Hz). HRMS (ESI) calculated for [M+Na]+ = [C20H20N2NaO2]+: 343.1417 found: 343.1418. Enantiomeric excess was determined by HPLC with a Chiralpak IA column (hexanes:2-propanol = 70:30, 1.0 mL/min, 254 nm); major enantiomer Rt = 10.4 min, minor enantiomer Rt = 11.9 min. [α]D20 = 66.8 (c = 0.3, CHCl3).

- 1. Synthesis of benzyl (1*R*,5*S*)-3-(4-((*S*)-2-((tert-butoxycarbonyl)amino)-3-methoxy-3-oxopropyl)phenyl)-8-azabicyclo[3.2.1]oct-2-ene-8-carboxylate (**3ca**).

Prepared according to typical procedure from *N*-sulfonylhydrazone **1c** (162.0 mg, 0.3 mmol), after a flash column chromatography (hexanes: EA = 6:1) afforded the product **3ca** as a yellow oil (76.2 mg, 58% yield) with 25:1 *dr*. 1H NMR (400 MHz, CDCl3) δ 7.34 – 7.26 (m, 7 H), 7.06 (d, *J* = 7.9 Hz, 2 H), 6.42 (s, 1 H), 5.13 (d, *J* = 4.5 Hz, 2 H), 4.99 (d, *J* = 8.3 Hz, 1 H), 4.56 (d, *J* = 15.9 Hz, 3 H), 3.71 (s, 3 H), 3.13 –3.00 (m, 3 H), 2.25 – 2.20 (m, 2 H), 2.07 – 1.94 (m, 2 H), 1.72 (dd, *J* = 13.0, 7.5 Hz, 1 H), 1.42 (s, 9 H). 13C NMR (101 MHz, CDCl3) δ 172.20, 155.00, 154.00, 138.35, 136.84, 135.20, 133.40, 129.21, 128.37, 128.21, 127.80, 127.67, 124.93, 79.85, 66.62, 54.30, 53.33, 52.16, 52.14, 37.82, 36.03 (d, *J* = 70.9 Hz), 34.43 (d, *J* = 67.8 Hz), 29.69 (d, *J* = 90.6 Hz), 28.22. Diastereomeric Ratio was determined by HPLC with a Chiralpak IA column (hexanes:2-propanol = 70:30, 0.5 mL/min, 254 nm); major diastereomer Rt = 24.9 min, minor diastereomer Rt = 27.2 min. HRMS (ESI) calculated for [M+Na]+ = [C30H36N2NaO6]+: 543.2466 found: 543.2463. [α]D20 = 44.4 (c = 0.3, CHCl3).

- 1. Synthesis of benzyl (1*R*,5*S*)-3-(4-((((1*R*,2*S*,5*R*)-2-isopropyl-5-methylcyclohexyl)oxy)methyl)phenyl)-8-azabicyclo[3.2.1]oct-2-ene-8-carboxylate (**3cb**).

Prepared according to typical procedure from *N*-sulfonylhydrazone **1c** (162.0 mg, 0.3 mmol), after a flash column chromatography (hexanes: EA = 8:1) afforded the product **3cb** as a colorless oil (124.0 mg, 85% yield) with 16:1 *dr*. 1H NMR (400 MHz, CDCl3) δ 7.37 – 7.23 (m, 9 H), 6.42 (s, 1 H), 5.16 (d, *J* = 3.7 Hz, 2 H), 4.64 (t, *J* = 12.2 Hz, 3 H), 4.40 (d, *J* = 11.6 Hz, 1 H), 3.18 (td, *J* = 10.5, 4.2 Hz, 2 H), 2.31 – 2.17 (m, 4 H), 2.08 – 1.96 (m, 2 H), 1.78 – 1.61 (m, 3 H), 1.40 – 1.27 (m, 3 H), 1.06 – 1.03 (m, 1 H), 0.95 (dd, *J* = 6.4, 2.6 Hz, 3 H), 0.91 (dd, *J* = 7.9, 3.1 Hz, 3 H), 0.86 (d, *J* = 3.3 Hz, 1 H).0.74 (d, *J* = 6.9 Hz, 3 H). 13C NMR (101 MHz, CDCl3) δ 153.99, 138.84, 138.40, 136.88, 133.70, 133.18, 128.37, 127.78, 127.70, 124.76, 78.70, 69.94, 66.60, 53.33, 52.18, 48.27, 40.25, 36.19 (d, *J* = 71.2 Hz), 34.48 (d, *J* = 67.7 Hz), 34.51, 31.49, 29.69 (d, *J* = 89.8 Hz), 25.48, 23.23, 22.32, 20.95, 16.08. Diastereomeric Ratio was determined by HPLC with a Chiralpak ASH column (hexanes: 2-propanol = 90:10, 1.0 mL/min, 254 nm); major diastereomer Rt = 4.2 min, minor diastereomer Rt = 5.1 min. HRMS (EI) calculated for [C32H41NO3]+: 487.3081 found: 487.3083. [α]D20 = -12.3 (c = 0.3, CHCl3).

- 1. Synthesis of benzyl (1*R*,5*S*)-3-(4-((((*R*)-2,5,7,8-tetramethyl-2-((4*R*,8*R*)-4,8,12-trimethyltridecyl)chroman-6-yl)oxy)methyl)phenyl)-8-azabicyclo[3.2.1]oct-2-ene-8-carboxylate (**3cc**).

Prepared according to typical procedure from *N*-sulfonylhydrazone **1c** (162.0 mg, 0.3 mmol), after a flash column chromatography (hexanes:EA = 8:1) afforded the product **3cc** as a white solid (198.8 mg, 87% yield) with >20:1 *dr*. Mp: 81-82 oC. 1H NMR (400 MHz, CDCl3) δ 7.46 – 7.30 (m, 9 H), 6.46 (s, 1 H), 5.16 (d, *J* = 3.6 Hz, 2 H), 4.66 (d, *J* = 25.6 Hz, 4 H), 3.13 (d, *J* = 62.4 Hz, 1 H), 2.60 (t, *J* = 6.8 Hz, 2 H), 2.28 (d, *J* = 16.8 Hz, 2 H), 2.23 (s, 3 H), 2.17 (s, 3 H), 2.11 (s, 3 H), 2.06 – 1.98 (m, 2 H), 1.87 – 1.74 (m, 3 H), 1.59 – 1.50 (m, 3 H), 1.47 – 1.33 (m, 4 H), 1.30 – 1.20 (m, 10 H), 1.21 – 1.06 (m, 6 H), 0.89 – 0.85 (m, 11 H). 13C NMR (101 MHz, CDCl3) δ 156.67, 154.07, 148.15, 147.91, 139.28, 137.35, 136.93, 133.74, 133.23, 128.44, 127.87, 127.63, 125.89, 124.97, 122.92, 117.59, 74.81, 74.33, 66.70, 53.42, 52.25, 40.03, 39.36, 37.47, 37.45, 37.41, 37.28, 36.19 (d, *J* = 71.2 Hz), 34.48 (d, *J* = 67.7 Hz), 32.79, 32.69, 31.33, 29.69 (d, *J* = 89.8 Hz), 27.96, 24.78, 24.43, 23.87, 22.70, 22.61, 21.02, 20.67, 19.74, 19.65, 12.86, 11.99, 11.79. Diastereomeric Ratio was determined by HPLC with a Chiralpak IF column (hexanes:2-propanol = 80:20, 1.0 mL/min, 254 nm); major diastereomer Rt = 7.1 min, minor diastereomer Rt = 7.8 min. HRMS (ESI) calculated for [M+Na]+ = [C51H71NNaO4]+: 784.5290 found: 784.5275. [α]D20 = 30.3 (c = 0.3, CHCl3).

- 1. Synthesis of benzyl (1*R*,5*S*)-3-(4-((((8*R*,9*S*,13*S*,14*S*)-13-methyl-17-oxo-7,8,9,11,12,13,14,15,16,17-decahydro-6H-cyclopenta[a]phenanthren-3-yl)oxy)methyl)phenyl)-8-azabicyclo[3.2.1]oct-2-ene-8-carboxylate (**3cd**).

Prepared according to typical procedure from *N*-sulfonylhydrazone **1c** (162.0 mg, 0.3 mmol), after a flash column chromatography (hexanes:EA = 8:1) afforded the product **3cd** as a colorless oil (161.1 mg, 89% yield) with 40:1 *dr*. 1H NMR (400 MHz, CDCl3) δ 7.36 (td, *J* = 12.8, 6.4 Hz, 9 H), 7.20 (d, *J* = 8.6 Hz, 1 H), 6.80 – 6.73 (m, 2 H), 6.46 – 6.45 (m, 1 H), 5.27 – 5.12 (m, 2 H), 5.03 (s, 2 H), 4.61 (s, 2 H), 3.12 (dd, *J* = 69.9, 17.0 Hz, 1 H), 2.93 – 2.88 (m, 2 H), 2.51 (dd, *J* = 18.9, 8.6 Hz, 1 H), 2.44 – 2.34 (m, 2 H), 2.28 – 2.23 (m, 2 H), 2.19 – 1.95 (m, 6 H), 1.71 (dd, *J* = 16.2, 9.7 Hz, 2 H), 1.63 – 1.44 (m, 5 H), 0.91 (s, 3 H).13C NMR (101 MHz, CDCl3) δ 207.58, 156.63, 153.69 (d, *J* = 45.1 Hz), 139.18, 137.61, 136.77,136.37, 133.44, 132.18, 128.43, 128.29, 128.07, 127.76 (d, *J* = 15.9 Hz), 127.25, 126.17, 124.89, 114.77, 112.24, 69.42, 67.05, 66.52, 53.26, 52.09, 50.24, 48.89, 47.81, 43.82, 38.18, 35.69, 34.39 (d, *J* = 64.2 Hz), 31.44, 29.29 (d, *J* = 33.3 Hz), 26.38, 25.75, 21.42, 13.69. Diastereomeric Ratio was determined by HPLC with a Chiralpak IF column (hexanes: 2-propanol = 60:40, 1.0 mL/min, 254 nm); major diastereomer Rt = 26.9 min, minor diastereomer Rt = 30.8 min. HRMS (ESI) calculated for [M+Na]+ = [C40H43NNaO4]+: 624.3080 found: 624.3084. [α]D20 = 67.6 (c = 0.3, CHCl3).

- 1. Synthesis of benzyl (1*R*,5*S*)-3-(4-((((3*S*,10*R*,13*R*)-10,13-dimethyl-17-((*R*)-6-methylheptan-2-yl)-2,3,4,7,8,9,10,11,12,13,14,15,16,17-tetradecahydro-1H-cyclopenta[a]phenanthren-3-yl)oxy)methyl)phenyl)-8-azabicyclo[3.2.1]oct-2-ene-8-carboxylate (**3ce**).

Prepared according to typical procedure from *N*-sulfonylhydrazone **1c** (162.0 mg, 0.3 mmol), after a flash column chromatography (hexanes: EA = 8:1) afforded the product **3ce** as a white solid (188.9 mg, 88% yield) with 25:1 *dr*. Mp: 113-114 oC. 1H NMR (400 MHz, CDCl3) δ 7.34 – 7.26 (m, 9 H), 6.42 (d, *J* = 11.6 Hz, 1 H), 5.35 – 5.33 (m, 1 H), 5.14 (d, *J* = 3.7 Hz, 2 H), 4.60 – 4.51 (m, 4 H), 3.30 – 2.94 (m, 2 H), 2.46 – 2.38 (m, 1 H), 2.31 – 2.22 (m, 3 H), 2.04 – 1.92 (m, 5 H), 1.89 – 1.80 (m, 2 H), 1.76 – 1.69 (m, 1 H), 1.63 (s, 1 H), 1.61 – 1.43 (m, 6 H), 1.44 – 1.29 (m, 4 H), 1.32 – 1.25 (m, 1 H), 1.19 – 1.05 (m, 6 H), 1.03 – 0.99(s, 5 H), 0.92 (d, *J* = 6.5 Hz, 4 H), 0.87 (dd, *J* = 6.6, 1.8 Hz, 6 H), 0.68 (s, 3 H). 13C NMR (101 MHz, CDCl3) δ 154.04, 140.91, 138.90, 138.37, 136.92, 129.63, 128.42, 127.84, 127.73, 127.54, 124.87, 121.58, 78.42, 69.48, 66.67, 56.76, 56.14, 53.38, 52.23, 50.18, 42.30, 39.77, 39.50, 39.13, 37.21, 36.87, 36.64 (d, *J* = 71.2 Hz), 36.17, 35.76, 34.54 (d, *J* = 68.5 Hz), 31.92, 31.87, 29.77 (d, *J* = 90.5 Hz), 28.42, 28.21, 27.99, 24.27, 23.80, 22.79, 22.54, 21.05, 19.37, 18.70, 11.84. Diastereomeric Ratio was determined by HPLC with a Chiralpak IF column (hexanes: 2-propanol = 80:20, 1.0 mL/min, 254 nm); major diastereomer Rt = 8.8 min, minor diastereomer Rt = 9.7 min. HRMS (ESI) calculated for [M+Na]+ = [C49H67NNaO3]+: 740.5005 found: 740.5013. [α]D20 = 10.4 (c = 0.3, CHCl3).

- 1. Synthesis of tert-butyl (1*R*,5*S*)-3-(4-(tert-butyl)phenyl)-8-azabicyclo[3.2.1]oct-2-ene-8-carboxylate (**4a**).

Prepared according to typical procedure from *N*-sulfonylhydrazone **1f** (151.5 mg, 0.3 mmol), after a flash column chromatography (hexanes:EA = 8:1) afforded the product **4a** as a white solid (82.6 mg, 96% yield) with 93% *ee*. Mp: 88-90 oC. 1H NMR (400 MHz, CDCl3) δ 7.42 – 7.22 (m, 5 H), 6.43 (s, 1 H), 4.53 (s, 2 H), 3.11 (d, *J* = 46.1 Hz, 1 H), 2.21 (s, 2 H), 2.05 – 1.92 (m, 2 H), 1.70 (dt, *J* = 15.4, 8.1 Hz, 1 H), 1.46 (s, 9 H). 13C NMR (101 MHz, CDCl3) δ 153.97, 139.94, 133.24, 128.78, 128.26, 127.26, 124.80, 79.26, 53.23 (d, *J* = 79.6 Hz), 51.99 (d, *J* = 62.6 Hz), 35.86, 34.37 (d, *J* = 53.2 Hz), 29.72 (d, *J* = 73.7 Hz), 28.38. HRMS (ESI) calculated for [M+Na]+ = [C18H23NNaO2]+: 308.1617 found: 308.1621. Enantiomeric excess was determined by HPLC with a Chiralpak IF column (hexanes:2-propanol = 90:10, 1.0 mL/min, 254 nm); major enantiomer Rt = 6.7 min, minor enantiomer Rt = 7.9 min. [α]D20 = 37.9 (c = 0.3, CHCl3).

- 1. Synthesis of tert-butyl (1*R*,5*S*)-3-(4-(tert-butyl)phenyl)-8-azabicyclo[3.2.1]oct-2-ene-8-carboxylate (**4b**).

Prepared according to typical procedure from *N*-sulfonylhydrazone **1f** (151.5 mg, 0.3 mmol), after a flash column chromatography (hexanes:EA = 8:1) afforded the product **4b** as a white solid (73.6 mg, 72% yield) with 93% *ee*. Mp: 94-96 oC. 1H NMR (400 MHz, CDCl3) δ 7.36 – 7.31 (m, 4 H), 6.42 (s, 1 H), 4.50 (d, *J* = 28.8 Hz, 2 H), 3.11 (d, *J* = 54.9 Hz, 1 H), 2.22 (s, 2 H), 2.05 – 1.91 (m, 2 H), 1.70 (t, *J* = 10.2 Hz, 1 H), 1.46 (s, 9 H), 1.32 (s, 9 H). 13C NMR (101 MHz, CDCl3) δ 154.01, 150.36, 137.02, 133.38, 132.79, 128.14, 127.45, 125.20, 124.46, 79.25, 53.29 (d, *J* = 78.1 Hz), 52.04 (d, *J* = 60.9 Hz), 35.85 (d, *J* = 33.8 Hz), 35.20 – 33.81 (m), 31.24, 30.37 – 29.09 (m), 28.41. HRMS (ESI) calculated for [M+Na]+ = [C22H31NNaO2]+: 364.2251 found: 364.2247. Enantiomeric excess was determined by HPLC with a Chiralpak IA column (hexanes: 2-propanol = 95:5, 1.0 mL/min, 254 nm); major enantiomer Rt = 4.9 min, minor enantiomer Rt = 6.0 min. [α]D20 = 74.4 (c = 0.3, CHCl3).

- 1. Synthesis of tert-butyl (1*R*,5*S*)-3-(4-fluorophenyl)-8-azabicyclo[3.2.1]oct-2-ene-8-carboxylate (**4c**).

Prepared according to typical procedure from *N*-sulfonylhydrazone **1f** (151.5 mg, 0.3 mmol), after a flash column chromatography (hexanes:EA = 8:1) afforded the product **4c** as a yellow oil (73.6 mg, 85% yield) with 93% *ee*. 1H NMR (400 MHz, CDCl3) δ 7.33 – 7.25 (m, 2 H), 6.95 (t, *J* = 8.7 Hz, 2 H), 6.33 (s, 1 H), 4.48 (s, 2 H), 3.16 – 2.94 (m, 1 H), 2.22 – 2.11 (m, 2 H), 2.01 – 1.85 (m, 2 H), 1.69 – 1.59 (m, 1 H), 1.43 (s, 9 H). 13C NMR (101 MHz, CDCl3) δ 162.01 (d, *J*F = 246.4 Hz)., 135.93 (tm, *J*F = 180.7 Hz), 132.73, 128.25 (dm, *J*F = 53.5 Hz), 127.15, 126.4 (dm, *J*F = 348.5 Hz), 114.92 (d, *J*F = 21.4 Hz)., 79.17, 53.09 (d, *J* = 79.0 Hz), 51.84 (d, *J* = 58.6 Hz), 35.95 (d, *J* = 32.4 Hz), 34.21 (d, *J* = 52.0 Hz), 29.61 (d, *J* = 73.7 Hz), 28.24. 19F NMR (376 MHz, CDCl3) δ -115.13. HRMS (ESI) calculated for [M+Na]+ = [C18H22FNNaO2]+: 326.1527 found: 326.1527. Enantiomeric excess was determined by HPLC with a Chiralpak IF column (hexanes:2-propanol = 90:10, 1.0 mL/min, 254 nm); major enantiomer Rt = 5.7 min, minor enantiomer Rt = 7.0 min. [α]D20 = 28.8 (c = 0.3, CHCl3).

- 1. Synthesis of tert-butyl (1*R*,5*S*)-3-(4-(methoxycarbonyl)phenyl)-8-azabicyclo[3.2.1]oct-2-ene-8-carboxylate (**4d**).

Prepared according to typical procedure from *N*-sulfonylhydrazone **1f** (151.5 mg, 0.3 mmol), after a flash column chromatography (hexanes: EA = 8:1) afforded the product **4d** as a white solid (73.6 mg, 76% yield) with 93% *ee*. Mp: 72-74 oC. 1H NMR (400 MHz, CDCl3) δ 7.99 – 7.97 (m, 2 H), 7.43 – 7.41 (m, 2 H), 6.57 (s, 1 H), 4.54 (s, 2 H), 3.91 (s, 3 H), 3.12 (d, *J* = 37.4 Hz, 1 H), 2.24 (d, *J* = 16.0 Hz, 2 H), 2.07 –1.94 (m, 2 H), 1.71 (dt, *J* = 15.0, 8.1 Hz, 1H), 1.46 (s, 9 H). 13C NMR (101 MHz, CDCl3) δ 166.76, 153.91, 144.31, 133.11, 130.71 (d, *J* = 65.3 Hz), 129.59, 128.77, 124.65, 79.42, 53.22 (d, *J* = 75.9 Hz), 51.95, 51.58 (d, *J* = 40.4 Hz), 35.73, 34.24 (d, *J* = 48.5 Hz), 29.70 (d, *J* = 75.8 Hz), 28.34. HRMS (ESI) calculated for [M+Na]+ = [C20H25NNaO4]+: 366.1680 found: 366.1676. Enantiomeric excess was determined by HPLC with a Chiralpak IF column (hexanes: 2-propanol = 85:15, 1.0 mL/min, 254 nm); major enantiomer Rt = 9.8 min, minor enantiomer Rt = 12.6 min. [α]D20 = 47.7 (c = 0.3, CHCl3).

- 1. Synthesis of tert-butyl (1*R*,5*S*)-3-(4-((benzyloxy)methyl)phenyl)-8-azabicyclo[3.2.1]oct-2-ene-8-carboxylate (**4e**).

Prepared according to typical procedure from *N*-sulfonylhydrazone **1f** (151.5 mg, 0.3 mmol), after a flash column chromatography (hexanes:EA = 8:1) afforded the product **4e** as a yellow oil (100.9 mg, 83% yield) with 94% *ee*. 1H NMR (400 MHz, CDCl3) δ 7.41 – 7.29 (m, 9 H), 6.46 (s, 1 H), 4.61 – 4.39 (m, 6 H), 3.14 (d, *J* = 47.6 Hz, 1 H), 2.25 (d, *J* = 17.0 Hz, 2 H), 2.07 – 1.97 (m, 2 H), 1.73 – 1.70 (m, 1 H), 1.49 (s, 9 H). 13C NMR (101 MHz, CDCl3) δ 153.91, 139.23, 138.12, 137.27, 133.36, 128.62, 128.23, 127.63, 127.57, 127.46, 124.75, 79.16, 71.85, 71.58, 53.17 (d, *J* = 77.7 Hz), 51.92 (d, *J* = 60.4 Hz), 35.85 (d, *J* = 35.2 Hz), 34.28 (d, *J* = 53.0 Hz), 29.65 (d, *J* = 76.9 Hz), 28.30. Enantiomeric excess was determined by HPLC with a Chiralpak IF column (hexanes:2-propanol = 90:10, 1.0 mL/min, 254 nm); major enantiomer Rt = 8.0 min, minor enantiomer Rt = 10.2 min. HRMS (ESI) calculated for [M+Na]+ = [C26H31NNaO3]+: 428.2196 found: 428.2205. [α]D20 = 36.4 (c = 0.3, CHCl3).

- 1. Synthesis of tert-butyl (1*R*,5*S*)-3-(4-(hydroxymethyl)phenyl)-8-azabicyclo[3.2.1]oct-2-ene-8-carboxylate (**4f**).

Prepared according to typical procedure from *N*-sulfonylhydrazone **1f** (151.5 mg, 0.3 mmol), after a flash column chromatography (hexanes:EA = 6:1) afforded the product **4f** as a white solid (81.9 mg, 91% yield) with 93% *ee*. Mp: 144-145 oC. 1H NMR (400 MHz, CDCl3) δ 7.38 – 7.29 (m, 4 H), 6.41 (d, *J* = 5.4 Hz, 1 H), 4.65 (s, 2 H), 4.48 (s, 2 H), 3.08 (d, *J* = 27.6 Hz, 1 H), 2.21 (s, 3 H), 2.03 – 1.91 (m, 2 H), 1.72 – 1.65 (m, 1 H), 1.44 (s, 9 H). 13C NMR (101 MHz, CDCl3) δ 154.03, 140.12, 139.24, 128.76, 128.09, 126.91, 124.95, 79.39, 64.83, 53.25 (d, *J* = 81.7 Hz), 52.01 (d, *J* = 62.3 Hz), 35.88, 34.37 (d, *J* = 52.6 Hz), 29.74 (d, *J* = 74.4 Hz), 28.38. Enantiomeric excess was determined by HPLC with a Chiralpak IA column (hexanes:2-propanol = 90:10, 1.0 mL/min, 254 nm); major enantiomer Rt = 12.9 min, minor enantiomer Rt = 15.2 min. HRMS (ESI) calculated for [M+Na]+ = [C19H25NNaO3]+: 338.1727 found: 338.1720. [α]D20 = 38.7 (c = 0.3, CHCl3).

- 1. Synthesis of tert-butyl (1*R*,5*S*)-3-(3,4-dichlorophenyl)-8-azabicyclo[3.2.1]oct-2-ene-8-carboxylate (**4g**).

Prepared according to typical procedure from *N*-sulfonylhydrazone **1f** (151.5 mg, 0.3 mmol), after a flash column chromatography (hexanes: EA = 20:1) afforded the product **4g** as a white solid (75.0 mg, 70% yield) with 87% *ee*. Mp: 92-94 oC. 1H NMR (400 MHz, CDCl3) δ 7.41 – 7.34 (m, 2 H), 7.17 (dd, *J* = 8.5, 2.2 Hz, 1 H), 6.45 (s, 1 H), 4.50 (s, 2 H), 3.04 (d, *J* = 32.2 Hz, 1 H), 2.18 (dd, *J* = 31.5, 14.4 Hz, 2 H), 2.05 – 1.90 (m, 2 H), 1.67 (d, *J* = 9.0 Hz, 1 H), 1.45 (s, 9 H). 13C NMR (101 MHz, CDCl3) δ 153.93, 140.00, 132.46, 132.02, 131.03, 130.57, 130.15, 126.81, 124.12, 79.55, 53.17 (d, *J* = 74.2 Hz), 51.84 (d, *J* = 55.4 Hz), 35.78, 33.99, 29.67, 28.39. Enantiomeric excess was determined by HPLC with a Chiralpak IF column (hexanes: 2-propanol = 90:10, 1.0 mL/min, 254 nm); minor enantiomer Rt = 6.2 min, minor enantiomer Rt = 8.7 min. HRMS (ESI) calculated for [M+Na]+ = [C18H21Cl2NNaO2]+: 376.0842 found: 376.0837. [α]D20 = 25.7 (c = 0.3, CHCl3).

- 1. Synthesis of ((1*R*,5*S*)-3-(4-(tert-butyl)phenyl)-8-azabicyclo[3.2.1]oct-2-en-8-yl)(phenyl)methanone (**4h**).

Prepared according to typical procedure from *N*-sulfonylhydrazone **1g** (152.7 mg, 0.3 mmol), after a flash column chromatography (hexanes:EA = 10:1) afforded the product **4h** as a white solid (91.0 mg, 88% yield) with 91% *ee*. Mp: 97-98 oC. 1H NMR (400 MHz, CDCl3) δ 7.67 – 7.33 (m, 9 H), 6.49 – 6.33 (m, 1 H), 5.12 (d, *J* = 14.7 Hz, 1 H), 4.34 (d, *J* = 23.6 Hz, 1 H), 3.38 – 2.92 (m, 1 H), 2.37 (dd, *J* = 17.2, 8.1 Hz, 1 H), 2.27 (t, *J* = 6.6 Hz, 1 H), 2.03 (s, 2 H), 1.80 (d, *J* = 12.1 Hz, 1 H), 1.32 (s, 9 H). 13C NMR (101 MHz, CDCl3) δ 167.56 (d, *J* = 84.4 Hz), 150.72, 136.16 (d, *J* = 41.0 Hz), 133.53 (d, *J* = 183.9 Hz), 129.81, 128.20 (d, *J* = 9.9 Hz), 127.20, 126.86, 125.85, 125.24, 124.40, 55.57 (d, *J* = 105.9 Hz), 50.78 (d, *J* = 94.8 Hz), 37.15 (d, *J* = 130.7 Hz), 34.44 (d, *J* = 130.7 Hz), 34.39, 31.16, 29.34 (d, *J* = 185.4 Hz).HRMS (ESI) calculated for [M+Na]+ = [C24H27NNaO]+: 368.1991 found: 458.2090. Enantiomeric excess was determined by HPLC with a Chiralpak IA column (hexanes:2-propanol = 85:15, 1.0 mL/min, 254 nm); major enantiomer Rt = 8.4 min, minor enantiomer Rt = 14.0 min. [α]D20 = 63.5 (c = 0.3, CHCl3).

- 1. Synthesis of ethyl (1*R*,5*S*)-3-(4-(tert-butyl)phenyl)-8-azabicyclo[3.2.1]oct-2-ene-8-carboxylate (**4i**).

Prepared according to typical procedure from *N*-sulfonylhydrazone **1h** (143.1 mg, 0.3 mmol), after a flash column chromatography (hexanes:EA = 10:1) afforded the product **4i** as a white solid (74.6 mg, 79% yield) with 92% *ee*. Mp: 67-69 oC. 1H NMR (400 MHz, CDCl3) δ 7.37 – 7.31 (m, 4 H), 6.44 (d, *J* = 5.7 Hz, 1 H), 4.57 (s, 2 H), 4.18 –4.10 (m, 2 H), 3.12 (d, *J* = 52.5 Hz, 1 H), 2.26 (d, *J* = 18.0 Hz, 2 H), 2.07 – 1.94 (m, 2 H), 1.73 (dd, *J* = 12.7, 7.4 Hz, 1 H), 1.33 (s, 9 H), 1.26 (t, *J* = 7.1 Hz, 3 H). 13C NMR (101 MHz, CDCl3) δ 154.29, 150.40, 136.73, 133.24, 127.38 (d, *J* = 52.2 Hz), 125.15, 124.38, 60.82, 53.18, 52.00, 35.89 (d, *J* = 44.8 Hz), 34.48 (d, *J* = 57.6 Hz), 34.37, 31.18, 29.66 (d, *J* = 85.0 Hz), 14.62. HRMS (ESI) calculated for [M+Na]+ = [C20H27NNaO2]+: 336.1935 found: 336.1934. Enantiomeric excess was determined by HPLC with a Chiralpak IA column (hexanes:2-propanol = 85:15, 1.0 mL/min, 254 nm); major enantiomer Rt = 5.0 min, minor enantiomer Rt = 5.5 min. [α]D20 = 65.2 (c = 0.3, CHCl3).

- 1. Synthesis of (1*R*,5*S*)-3-(4-(tert-butyl)phenyl)-8-tosyl-8-azabicyclo[3.2.1]oct-2-ene (**4j**).

Prepared according to typical procedure from *N*-sulfonylhydrazone **1i** (167.7 mg, 0.3 mmol), after a flash column chromatography (hexanes:EA = 5:1) afforded the product **4j** as a white solid (73.6 mg, 72% yield) with 94% *ee*. Mp: 181-183 oC. 1H NMR (400 MHz, CDCl3) δ 7.79 – 7.74 (m, 2 H), 7.324 – 7.10 (m, 6 H), 6.27 – 6.21 (m, 1 H), 4.53 – 4.45 (m, 2 H), 2.95 – 2.89 (m, 1 H), 2.35 (d, *J* = 5.8 Hz, 3 H), 2.25 (dd, *J* = 16.9, 5.8 Hz, 1 H), 2.10 – 2.00 (m, 1 H), 1.95 – 1.80 (m, 2 H), 1.67 – 1.58 (m, 1 H), 1.40 – 1.28 (m, 9 H). 13C NMR (101 MHz, CDCl3) δ 150.57, 143.20, 137.38, 136.34, 133.22, 129.39 (d, *J* = 2.6 Hz), 127.50 (d, *J* = 2.7 Hz), 125.99, 125.09 (d, *J* = 2.5 Hz), 124.44 (d, *J* = 2.1 Hz), 55.76, 55.18, 37.21, 35.17, 34.42, 31.20, 30.07, 21.38. HRMS (ESI) calculated for [M+Na]+ = [C24H29NNaO2S]+: 418.1811 found: 415.1815. Enantiomeric excess was determined by HPLC with a Chiralpak IG column (hexanes: 2-propanol = 85:15, 1.0 mL/min, 254 nm); minor enantiomer Rt = 23.1 min, major enantiomer Rt = 24.7 min. [α]D20 = 12.8 (c = 0.3, CHCl3).

- 1. Synthesis of (1*R*,5*S*)-3-(4-(tert-butyl)phenyl)-8-oxabicyclo[3.2.1]oct-2-ene (**4k**).

Prepared according to typical procedure from *N*-sulfonylhydrazone **1j** (121.8 mg, 0.3 mmol), after a flash column chromatography (hexanes: EA = 20:1) afforded the product **4k** as a white solid (75.0 mg, 70% yield) with 95% *ee*. Mp: 104-105 oC. 1H NMR (400 MHz, CDCl3) δ 7.38 – 7.32 (m, 4 H), 6.35 (d, *J* = 4.6 Hz, 1 H), 4.73 (t, *J* = 6.5 Hz, 1 H), 4.64 (t, *J* = 5.3 Hz, 1 H), 3.03 (dd, *J* = 17.0, 5.0 Hz, 1 H), 2.22 – 2.14 (m, 2 H), 2.09 – 1.96 (m, 2 H), 1.78 – 1.71 (m, 1 H), 1.33 (s, 9 H). 13C NMR (101 MHz, CDCl3) δ 150.34, 136.84, 131.79, 127.00, 125.20, 124.37, 73.27, 72.99, 36.15, 35.13, 34.43, 31.25, 29.73. HRMS (ESI) calculated for [M+Na]+ = [C17H22NaO]+: 265.1563 found: 265.1559. Enantiomeric excess was determined by HPLC with a Chiralpak OJH column (hexanes: 2-propanol = 98:2, 1.0 mL/min, 254 nm); minor enantiomer Rt = 9.7 min, minor enantiomer Rt = 12.1 min. [α]D20 = -18.9 (c = 0.3, CHCl3).

1. **General Procedure for the Synthesis of products 7-22**

5.1. Synthesis of (9*H*-fluoren-9-yl)methyl (1*R*,5*S*)-3-(4-(tert-butyl)phenyl)-8-azabicyclo[3.2.1]oct-2-ene-8-carboxylate(**5)**1, 2.

**4b** (102.4 mg, 0.3 mmol) was suspended in DCM (3 mL). Then the mixture was treated with TFA (1mL) for 1 h. After the reaction was diluted by DCM, saturated aqueous NaHCO3 was added dropwise. The organic layer was separated and the aqueous layer was extracted with DCM. The combined organic phases were dried over Na2SO4 and concentrated in vacuo. The residue was used in the next step without any further purification.

The reaction mixture was suspended in DCM (10 mL) at 0 ℃, Then TEA (60.6 mg, 0.6 mmol) and FmocCl(155.4 mg, 0.6 mmol) was added successively, the reaction mixture was then quenched with saturated NaHCO3 solution and extracted with DCM. The combined organic layers were dried over Na2SO4 and concentrated in vacuo. The residue was purified by flash column chromatography to provide analytically pure product **5** as a white solid (112.3 mg, 81% yield) with 91% *ee*. Mp: 98-100 oC. 1H NMR (400 MHz, CDCl3) δ 7.77 (t, *J* = 7.2 Hz, 2 H), 7.61 (dd, *J* = 7.6, 3.5 Hz, 2 H), 7.43 – 7.27 (m, 8 H), 6.44 (dt, *J* = 5.6, 1.7 Hz, 1 H), 4.61 – 4.25 (m, 5 H), 3.02 (dd, *J* = 143.6, 17.0 Hz, 1 H), 2.24 (s, 2 H), 2.02 (s, 2 H), 1.76 – 1.69 (m, 1 H), 1.34 (s, 9 H). 13C NMR (101 MHz, CDCl3) δ 153.88, 150.52, 144.05, 141.26, 136.61, 133.53,132.84 127.53, 126.96, 126.91, 125.18, 125.00, 124.45, 119.86, 66.70 (d, *J* = 22.9 Hz), 53.35 (d, *J* = 15.4 Hz), 52.21, 47.36, 35.90 (d, *J* = 61.1 Hz), 35.00 – 33.90 (m), 31.22, 29.71 (d, *J* = 97.3 Hz). HRMS (ESI) calculated for [M+Na]+ = [C32H33NNaO2]+: 486.2404 found: 486.2411. Enantiomeric excess was determined by HPLC with a Chiralpak IA column (hexanes: 2-propanol = 90:10, 1.0 mL/min, 254 nm); major enantiomer Rt = 12.9 min, minor enantiomer Rt = 17.0 min. [α]D20 = 14.6 (c = 0.3, CHCl3).

- 1. Synthesis of (1*R*,5*S*)-3-(4-(tert-butyl)phenyl)-8-(ethylsulfonyl)-8-azabicyclo[3.2.1]oct-2-ene (**6**) 1, 2.

**4b** (102.4 mg, 0.3 mmol) was suspended in DCM (3 mL). Then the mixture was treated with TFA (1mL) for 1 h. After the reaction was diluted by DCM, saturated aqueous NaHCO3 was added dropwise. The organic layer was separated and the aqueous layer was extracted with DCM. The combined organic phases were dried over Na2SO4 and concentrated in vacuo. The residue was used in the next step without any further purification.

The reaction mixture was suspended in DCM (10 mL) at 0 ℃, Then TEA (60.6 mg, 0.6 mmol) and Ethanesulfonyl chloride(77.4 mg, 0.6 mmol) was added successively, the reaction mixture was then quenched with saturated NaHCO3 solution and extracted with DCM. The combined organic layers were dried over Na2SO4 and concentrated in vacuo. The residue was purified by flash column chromatography to provide analytically pure product **6** as a yellow solid (80.5 mg, 81% yield) with 91% *ee*. Mp: 78-80 oC. 1H NMR (400 MHz, CDCl3) δ 7.38 – 7.31 (m, 4 H), 6.44 – 6.40 (m, 1 H), 4.51 – 4.45 (m, 2 H), 3.12 – 3.02 (m, 3 H), 2.43 – 2.22 (m, 2 H), 2.20 – 2.01 (m, 2 H), 1.77 – 1.69 (m, 1 H), 1.36 (td, *J* = 7.4, 1.5 Hz, 3 H), 1.32 (d, *J* = 1.5 Hz, 9 H). 13C NMR (101 MHz, CDCl3) δ 150.83, 136.19, 132.38 (d, *J* = 178.2 Hz), 126.12, 125.32, 124.39, 55.97, 55.42, 48.35, 37.53, 36.03, 34.45, 31.20, 30.39, 8.31. HRMS (ESI) calculated for [M+Na]+ = [C19H27NNaO2S]+: 356.1655 found: 356.1659. Enantiomeric excess was determined by HPLC with a Chiralpak ADH column (hexanes: 2-propanol = 90:10, 1.0 mL/min, 210 nm); major enantiomer Rt = 8.2 min, minor enantiomer Rt = 9.4 min. [α]D20 = 47.9 (c = 0.3, CHCl3).

- 1. Synthesis of (1*R*,5*S*)-3-(4-(tert-butyl)phenyl)-8-phenyl-8-azabicyclo[3.2.1]oct-2-ene(**7**) 1, 3.

**4b** (102.4 mg, 0.3 mmol) was suspended in DCM (3 mL). Then the mixture was treated with TFA (1mL) for 1 h. After the reaction was diluted by DCM, saturated aqueous NaHCO3 was added dropwise. The organic layer was separated and the aqueous layer was extracted with DCM. The combined organic phases were dried over Na2SO4 and concentrated in vacuo. The residue was used in the next step without any further purification.

A 10 mL oven-dried sealed tube was added the reaction mixture, Pd2(dba)3 (13.8 mg, 0.015 mmol, 5 mol%), Brettphos (24.0 mg, 0.06 mmol, 20 mol%), Nao*t*Pent (66.0mg, 0.45 mmol, 1.5 equiv.). The flask was evacuated and refilled with argon. Then, PhBr (0.48 mmol, 1.6 equiv.), toluene (3 mL) were added to the tube, and stirred at 100 ℃ for 24 h. After the reaction was complete (monitored by TLC), the solvent was removed under reduced pressure. The crude product was then purified by flash column chromatography on silica gel to afford the desired product **7** as a white solid (67.2 mg, 71% yield) with 89% *ee*. Mp: 119-121 oC. 1H NMR (400 MHz, CDCl3) δ 7.39 – 7.21 (m, 6 H), 7.04 – 6.96 (m, 2 H), 6.80 – 6.76 (m, 1 H), 6.64 (dt, *J* = 5.1, 1.6 Hz, 1 H), 4.55 (dd, *J* = 7.8, 4.5 Hz, 1 H), 4.41 (t, *J* = 5.4 Hz, 1 H), 3.06 – 3.00 (m, 1 H), 2.46 – 2.36 (m, 1 H), 2.26 – 2.07 (m, 3 H), 1.92 – 1.85 (m, 1 H), 1.35 (d, *J* = 2.9 Hz, 9 H). 13C NMR (101 MHz, CDCl3) δ 150.13, 147.56, 136.92, 132.68, 128.91, 127.49, 125.06, 124.30, 118.14, 116.47, 54.25, 53.96, 34.36, 34.32, 32.69, 31.22, 29.97. HRMS (ESI) calculated for [M+H]+ = [C23H28N]+: 318.2216 found: 318.2211. Enantiomeric excess was determined by HPLC with a Chiralpak ODH column (hexanes: 2-propanol = 95:5, 1.0 mL/min, 254 nm); minor enantiomer Rt = 4.8 min, major enantiomer Rt = 5.1 min. [α]D20 = -6.7 (c = 0.3, CHCl3).

- 1. Synthesis of benzyl (1*R*,2*S*,3*R*,5*S*)-2-hydroxy-3-(4-isopropylphenyl)-8-azabicyclo[3.2.1]octane-8-carboxylate(**8**) 4.

**3c** (108.3 mg, 0.3 mmol) was suspended in THF (3 mL) at -15 oC. Then the mixture was treated with BH3·DMS (0.9 mL, 0.9 mmol) and was stirred overnight. NaBO3·4H2O (153.0 mg, 1.5 mmol) and THF/H2O were added slowly in order at 0 oC, and the mixture was stirred for 8 h at room temperature. After the indicated time the reaction mixture was extracted with EA, and the combined organic phases were dried over Na2SO4 and concentrated in vacuo. The residue was purified by flash silica gel column chromatography to provide analytically pure product **8** as a colorless oil (78.5 mg, 69% yield) with 92% *ee*. 1H NMR (400 MHz, CDCl3) δ 7.50 – 7.21 (m, 6 H), 7.18 – 7.10 (m, 3 H), 5.21 (d, *J* = 22.2 Hz, 2 H), 4.43 – 4.38 (m, 2 H), 3.66 (s, 1 H), 2.97 –2.83 (m, 1 H), 2.44 – 2.34 (m, 2 H), 2.34 (s, 1 H), 2.15 (d, *J* = 11.0 Hz, 1 H), 1.99 – 1.81 (m, 2 H), 1.69 (s, 1 H), 1.58 – 1.53 (m, 1 H), 1.27 – 1.23 (m, 6 H). 13C NMR (101 MHz, CDCl3) δ 154.18, 148.12, 143.75, 136.85 (d, *J* = 11.6 Hz), 128.53, 127.89 (d, *J* = 4.5 Hz), 126.60, 126.29, 125.25, 81.30, 71.32, 66.81, 60.00, 52.17, 44.13 (d, *J* = 100.1 Hz), 34.12 (d, *J* = 98.5 Hz), 31.56 (d, *J* = 47.6 Hz), 29.29 – 26.96 (m), 23.94. HRMS (ESI) calculated for [M+Na]+ = [C24H29NNaO3]+: 402.2040 found: 402.2044. Enantiomeric excess was determined by HPLC with a Chiralpak ODH column (hexanes: 2-propanol = 85:15, 1.0 mL/min, 210 nm); minor enantiomer Rt = 7.2 min, major enantiomer Rt = 7.8 min. [α]D20 = -8.9 (c = 0.3, CHCl3).

- 1. Synthesis of benzyl (1*R*,5*S*)-3-(4-(tert-butyl)phenyl)-2-oxo-8-azabicyclo[3.2.1]octane-8-carboxylate (**9**) 4, 5.

**3c** (108.3 mg, 0.3 mmol) was suspended in THF (3 mL) at -15 oC. Then the mixture was treated with BH3·DMS (0.9 mL, 0.9 mmol) and was stirred overnight. NaBO3·4H2O (153.0 mg, 1.5 mmol) and THF/H2O were added slowly in order at 0 oC, and the mixture was stirred for 8 h at room temperature. After the indicated time the reaction mixture was extracted with EA, and the combined organic phases were dried over Na2SO4 and concentrated in vacuo. The residue was used in the next step without any further purification.

A round-bottom flask was added the residue and Dess-Martin periodinane (254.4 mg, 0.6 mmol) in DCM and the reaction mixture was stirred at room temperature for 2 h. After the indicated time the reaction mixture was quenched with water and extracted with EA. The combined organic phases were washed with brine, dried over anhydrous Na2SO4, and concentrated at the reduced pressure. The residue was purified by flash silica gel column chromatography to provide analytically pure product **9** as a colorless oil (70.4 mg, 60% yield) with 90% *ee*. 1H NMR (400 MHz, CDCl3) δ 7.39 – 7.32 (m, 5 H), 7.21 – 7.09 (m, 4 H), 5.18 (s, 2 H), 4.61 (d, *J* = 6.3 Hz, 2 H), 3.67 (dd, *J* = 11.5, 7.9 Hz, 1 H), 2.93 – 2.83 (m, 1 H), 2.34 – 2.16 (m, 4 H), 2.00 (t, *J* = 7.4 Hz, 2 H), 1.24 (d, *J* = 6.9 Hz, 6 H). 13C NMR (101 MHz, CDCl3) δ 204.08, 154.08, 147.61, 136.38, 135.23, 128.79, 128.54, 128.09, 126.72, 126.71, 67.21, 64.43, 54.03, 48.95, 41.28, 33.69, 29.70, 27.50 (d, *J* = 84.6 Hz), 23.90. HRMS (ESI) calculated for [M+Na]+ = [C24H27NNaO3]+: 400.1883 found: 400.1882. Enantiomeric excess was determined by HPLC with a Chiralpak IBN5 column (hexanes: 2-propanol = 90:10, 1.0 mL/min, 210 nm); minor enantiomer Rt = 10.2 min, major enantiomer Rt = 14.1 min. [α]D20 = 41.2 (c = 0.2, CHCl3).

- 1. Synthesis of benzyl (1*R*,2*R*,4*R*,6*S*)-4-(4-(tert-butyl)phenyl)-3-oxa-9-azatricyclo[4.2.1.02,4]nonane-9-carboxylate (10)6.

**3c** (108.3 mg, 0.3 mmol) was suspended in DCM (3 mL) at -15 oC. Then m-CPBA was added. The reaction mixture was stirred at -15 oC for 4 h, and then diluted with 10% aq. NaOH (10.0 mL). The reaction mixture was warmed up to ambient temperature. Two phases were separated, and the aqueous layer was extracted with DCM. The combined organic phases were dried over Na2SO4 and concentrated in vacuo. The residue was purified by flash silica gel column chromatography to provide analytically pure product **10** as a colorless oil (94.0 mg, 84% yield) with 91% *ee* and >20:1 *dr*. 1H NMR (400 MHz, CDCl3) δ 7.48 – 7.21 (m, 9 H), 5.32 – 5.15 (m, 2 H), 4.66 – 4.51 (m, 1 H), 4.33 – 4.20 (m, 1 H), 3.03 – 2.86 (m, 2 H), 2.78 – 2.50 (m, 1 H), 2.34 – 2.23 (m, 1 H), 2.14 – 1.91 (m, 3 H), 1.88 – 1.76 (m, 1 H), 1.27 (td, *J* = 8.7, 4.7 Hz, 6 H). 13C NMR (101 MHz, CDCl3) δ 155.21, 148.20, 138.42, 136.88, 128.36, 127.81, 127.76, 126.45, 125.29, 66.72 (d, *J* = 5.7 Hz), 62.37 (d, *J* = 38.6 Hz), 56.74 (d, *J* = 30.6 Hz), 52.84, 50.20 (d, *J* = 20.6 Hz), 34.56, 33.68, 33.58, 28.98 (d, *J* = 101.1 Hz), 25.62 (d, *J* = 78.9 Hz). HRMS (ESI) calculated for [M+Na]+ = [C30H29NNaO2]+: 400.1883 found: 400.1886. Enantiomeric excess was determined by HPLC with a Chiralpak ODH column (hexanes: 2-propanol = 90:10, 1.0 mL/min, 210 nm); minor enantiomer Rt = 8.7 min, major enantiomer Rt = 9.5 min. [α]D20 = 14.5 (c = 0.3, CHCl3).

- 1. Synthesis of benzyl (1*R*,2*R*,3*R*,5*S*)-2,3-dihydroxy-3-(4-isopropylphenyl)-8-azabicyclo[3.2.1]octane-8-carboxylate(**11**) 7.

**3c** (108.3 mg, 0.3 mmol) was suspended in acetone (3 mL). Then K2OsO4·2H2O (28.0 mg, 0.09mmol) and NMO (140.4, 1.2 mmol) were added. The reaction mixture was stirred at room temperature overnight. After the indicated time the reaction mixture was quenched with Na2SO3 solution and extracted with EA. The combined organic phases were washed with brine, dried over anhydrous Na2SO4, and concentrated at the reduced pressure. The residue was purified by flash silica gel column chromatography to provide analytically pure product **11** as a yellow solid (100.5 mg, 85% yield) with 92% *ee* and >20:1 *dr*. Mp: 82-84 oC. 1H NMR (400 MHz, CDCl3) δ 7.49 – 7.29 (m, 7 H), 7.21 (d, *J* = 8.2 Hz, 2 H), 5.22 – 5.14 (m, 2 H), 4.46 (dd, *J* = 15.6, 7.1 Hz, 2 H), 4.04 (d, *J* = 5.6 Hz, 1 H), 3.30 (d, *J* = 38.8 Hz, 1 H), 2.95 – 2.84 (m, 1 H), 2.44 – 2.33 (m, 1 H), 2.05 – 1.97 (m, 2 H), 1.86 – 1.75 (m, 1 H), 1.62 – 1.56 (m, 2 H), 1.53 – 1.46 (m, 1 H), 1.24 (d, *J* = 6.9 Hz, 6 H). 13C NMR (101 MHz, CDCl3) δ 150.04, 148.06, 142.43, 136.62, 128.46, 127.99, 127.87, 126.27, 125.57, 78.35, 72.04, 67.13, 58.88, 51.71, 40.52, 33.57, 29.72, 26.25, 23.87 (d, *J* = 1.9 Hz). HRMS (ESI) calculated for [M+Na]+ = [C24H29NNaO4]+: 418.1989 found: 418.1999. Enantiomeric excess was determined by HPLC with a Chiralpak IA column (hexanes: 2-propanol = 70:30, 1.0 mL/min, 210 nm); minor enantiomer Rt = 6.8 min, major enantiomer Rt = 7.2 min. [α]D20 = 50.1 (c = 0.2, CHCl3).

- 1. Synthesis of benzyl (1*R*,2*S*,3*R*,5*S*)-2-chloro-3-(4-isopropylphenyl)-8-azabicyclo[3.2.1]octane-8-carboxylate(**12**) 8.

**3c** (108.3 mg, 0.3 mmol) was suspended in THF (3 mL) at -15 oC, and treated with BH3·DMS (0.9 mL, 0.9 mmol). The mixture was stirred overnight. NaBO3·4H2O (153.0 mg, 1.5 mmol) and THF/H2O were added slowly in order at 0 oC, and the mixture was stirred for 8 h at room temperature. After the indicated time the reaction mixture was extracted with EA, and the combined organic phases were dried over Na2SO4 and concentrated in vacuo. The residue was used in the next step without any further purification.

To a round-bottom flask was added the residue in DMF (3 mL) at 0 oC. Then POCl3 (0.3 mL) in DMF (3.5 mL) was added dropwise. The reaction mixture was allowed to reach rt overnight. After the indicated time the reaction mixture was quenched with NaOH solution (1.0M) and extracted with EA. The combined organic phases were washed with brine, dried over anhydrous Na2SO4, and concentrated at the reduced pressure. The residue was purified by flash silica gel column chromatography to provide analytically pure product **12** as a colorless oil (48.9 mg, 41% yield) with 91% *ee*. 1H NMR (400 MHz, CDCl3) δ 7.88 (d, *J* = 58.8 Hz, 1 H), 7.42 – 7.26 (m, 5 H), 7.17 – 7.12 (m, 3 H), 5.26 – 5.09 (m, 2 H), 4.90 (d, *J* = 8.6 Hz, 1 H), 4.49 – 4.37 (m, 2 H), 2.92 – 2.83 (m, 1 H), 2.74 (dt, *J* = 11.1, 8.2 Hz, 1 H), 2.50 (s, 1 H), 2.20 – 2.12 (m, 1 H), 1.99 – 1.85 (m, 2 H), 1.63 – 1.56 (m, 1 H), 1.49 – 1.38 (m, 1 H), 1.24 (d, *J* = 6.9 Hz, 6 H). 13C NMR (101 MHz, CDCl3) δ 160.57, 147.34, 137.96, 136.74, 128.42, 127.96, 127.77, 127.57, 126.50, 81.27, 66.83, 57.79, 51.20, 39.76, 34.56 (d, *J* = 79.3 Hz), 33.54, 31.27 (d, *J* = 76.6 Hz), 27.61 (d, *J* = 51.4 Hz), 23.86. HRMS (EI) calculated for [C24H28ClNO2]+: 397.1809 found: 397.1809. Enantiomeric excess was determined by HPLC with a Chiralpak IC column (hexanes:2-propanol = 85:15, 1.0 mL/min, 210 nm); major enantiomer Rt = 14.3 min, minor enantiomer Rt = 15.7 min. [α]D20 = -14.5 (c = 0.2, CHCl3).

- 1. Synthesis of tert-butyl (1*R*,2*S*,3*R*,5*S*)-3-(4-((benzyloxy)methyl)phenyl)-2-hydroxy-8-azabicyclo[3.2.1]octane-8-carboxylate(**13**) 4.

**4e** (810 mg, 2.0 mmol) was suspended in THF (15 mL) at -15 oC, and treated with BH3·DMS (6.0 mL, 6.0 mmol). The mixture was stirred overnight. NaBO3·4H2O (1.02 g, 10.0 mmol) and THF/H2O were added slowly in order at 0 oC, and the mixture was stirred for 8 h at room temperature. After the indicated time the reaction mixture was extracted with EA, and the combined organic phases were dried over Na2SO4 and concentrated in vacuo. The residue was purified by flash silica gel column chromatography to provide analytically pure product **13** as a colorless oil (652.0 mg, 77% yield) with 94% *ee*. 1H NMR (400 MHz, CDCl3) δ 7.39 – 7.23 (m, 9 H), 4.55 (d, *J* = 10.5 Hz, 4 H), 4.33 (d, *J* = 20.3 Hz, 2 H), 3.66 (d, *J* = 7.3 Hz, 1 H), 2.46 (dd, *J* = 18.0, 10.2 Hz, 2 H), 2.20 – 2.10 (m, 1 H), 1.94 – 1.82 (m, 1 H), 1.70 – 1.64 (d, *J* = 15.8 Hz, 1 H), 1.53 (s, 9 H), 1.37 – 1.28 (m, 2 H). 13C NMR (101 MHz, CDCl3) δ 145.97, 141.71, 138.19, 136.58, 128.29, 127.95, 127.66, 127.52, 125.37, 81.41, 79.87, 72.03, 71.72, 59.64, 51.62 (d, *J* = 134.3 Hz), 44.94, 43.81, 34.44, 31.55, 28.36. HRMS (ESI) calculated for [M+Na]+ = [C26H33NNaO4]+: 446.2308 found: 446.2302. Enantiomeric excess was determined by HPLC with a Chiralpak IBN5 column (hexanes: 2-propanol = 80:20, 1.0 mL/min, 210 nm); minor enantiomer Rt = 6.9 min, major enantiomer Rt = 7.4 min. [α]D20 = -3.7 (c = 0.3, CHCl3).

- 1. Synthesis of tert-butyl (1*R*,2*S*,3*R*,5*S*)-3-(4-((benzyloxy)methyl)phenyl)-2-(naphthalen-1-ylmethoxy)-8-azabicyclo[3.2.1]octane-8-carboxylate (**14**).

NaH (1.54 mmol) was suspended in THF (10 mL) at rt. A solution of **13** (325.0 mg, 0.77 mmol) in THF (10 mL) was then added dropwise. The mixture was stirred for 2 hours. 2-(Bromomethyl)naphthalene(340.0 mg, 1.54 mmol) was added, and the reaction mixture was stirred for an additional 8 h. After the indicated time the reaction was quenched with water and extracted with EA. The combined organic phases were dried over Na2SO4 and concentrated in vacuo. The residue was purified by flash silica gel column chromatography to provide analytically pure product **8** as a colorless oil (330.8 mg, 76% yield) with 94% *ee*. 1H NMR (400 MHz, CDCl3) δ 7.80 – 7.78 (m, 1 H), 7.71 – 7.69 (m, 2 H), 7.50 – 7.40 (m, 7 H), 7.37 – 7.33 (m, 3 H), 7.25 (d, *J* = 7.8 Hz, 2 H), 7.20 – 7.18 (m, 1 H), 4.82 – 4.78 (m, 1 H), 4.71 – 4.38 (m, 7 H), 3.48 (d, *J* = 8.5 Hz, 1 H), 2.83 – 2.78 (m, 1 H), 2.58 – 2.49 (m, 1 H), 2.15 (d, *J* = 11.8 Hz, 1 H), 1.97 – 1.88 (m, 1 H), 1.59 (s, 9 H), 1.54 – 1.49 (m, 2 H), 1.34 – 1.27 (m, 1 H). 13C NMR (101 MHz, CDCl3) δ 154.54, 142.31, 138.21, 136.19, 135.62, 132.96, 132.64, 128.24, 128.15, 127.68, 127.65, 127.63, 127.59, 127.45, 127.41, 126.09, 125.71, 125.46, 125.33, 86.75 (d, *J* = 118.8 Hz), 79.16, 72.00, 71.82, 70.01, 56.17 (d, *J* = 37.2 Hz), 50.83 (d, *J* = 116.7 Hz), 42.12, 34.68 (d, *J* = 51.9 Hz), 31.54, 28.31, 27.72 (d, *J* = 59.3 Hz). HRMS (ESI) calculated for [M+Na]+ = [C37H41NNaO4]+: 586.2928 found: 586.2936. Enantiomeric excess was determined by HPLC with a Chiralpak ODH*2 column (hexanes: 2-propanol = 95:5, 1.0 mL/min, 210 nm); major enantiomer Rt = 17.5 min, minor enantiomer Rt = 23.5 min. [α]D20 = -7.3 (c = 0.3, CHCl3).

- 1. Synthesis of (1*R*,2*S*,3*R*,5*S*)-3-(4-((benzyloxy)methyl)phenyl)-2-(naphthalen-1-ylmethoxy)-8-azabicyclo[3.2.1]octane(**15**) 4.

**14** (330.8 mg, 0.59 mmol) was suspended in DCM (10 mL), and treated with TFA (6mL) for 1 h. After the reaction was diluted by DCM, saturated aqueous NaHCO3 was added dropwise. The organic layer was separated and the aqueous layer was extracted with DCM. The combined organic layers were dried over Na2SO4 and concentrated in vacuo. The residue was purified by flash column chromatography to provide analytically pure product **5** as a white solid (274.0 mg, >99% yield) with 94% *ee*. Mp: 78-80 oC. 1H NMR (400 MHz, CDCl3) δ 7.78 – 7.75 (m, 1 H), 7.68 (d, *J* = 8.5 Hz, 2 H), 7.50 (s, 1 H), 7.45 – 7.36 (m, 6 H), 7.34 – 7.28 (m, 3 H), 7.24 (d, *J* = 8.0 Hz, 2 H), 7.19 (dd, *J* = 8.4, 1.6 Hz, 1 H), 4.71 (d, *J* = 12.6 Hz, 1 H), 4.59 (d, *J* = 12.1 Hz, 4 H), 4.54 (d, *J* = 12.6 Hz, 1 H), 3.71 (d, *J* = 7.9 Hz, 1 H), 3.60 (t, *J* = 7.1 Hz, 1 H), 3.41 (d, *J* = 7.6 Hz, 1 H), 2.99 – 2.92 (m, 1 H), 2.28 – 2.21 (m, 2 H), 2.05 – 1.93 (m, 1 H), 1.80 – 1.71 (m, 1 H), 1.55 – 1.45 (m, 2 H), 1.37 – 1.22 (m, 1 H). 13C NMR (101 MHz, CDCl3) δ 143.46, 138.31, 136.05, 135.85, 133.09, 132.75, 128.35, 128.03, 127.80, 127.72, 127.55, 127.51, 126.04, 125.80, 125.58, 125.56, 86.29, 72.10, 71.92, 70.45, 57.41, 51.50, 40.62, 34.38, 32.67, 27.83. HRMS (ESI) calculated for [M+H]+ = [C32H34NO2]+: 464.2584 found: 464.2593. Enantiomeric excess was determined by HPLC with a Chiralpak ODH column (hexanes:2-propanol = 95:5, 1.0 mL/min, 210 nm); major enantiomer Rt = 16.1 min, minor enantiomer Rt = 21.1 min. [α]D20 = -11.8 (c = 0.3, CHCl3).

(*Note: Determination of ee value of 15: Dissolve 15, NEt3 (1.0 eq) and Di-tert-butyl decarbonate (1.0 eq) in THF and stir for 1 h, the equivalent is converted into 14, and then the ee value is determined.*)

- 1. Synthesis of tert-butyl (1R,2S,3R,5S)-3-(4-fluorophenyl)-2-hydroxy-8-azabicyclo[3.2.1]octane-8-carboxylate(**18**) 4.

**4c** (610 mg, 2.0 mmol) was suspended in THF (15 mL) at -15 oC, and treated with BH3·DMS (6.0 mL, 6.0 mmol). The mixture was stirred overnight. NaBO3·4H2O (1.02 g, 10.0 mmol) and THF/H2O were added slowly in order at 0 oC, and the mixture was stirred for 8 h at room temperature. After the indicated time, the reaction mixture was extracted with EA, and the combined organic phases were dried over Na2SO4 and concentrated in vacuo. The residue was purified by flash silica gel column chromatography to provide analytically pure product **8** as a colorless oil (437.0 mg, 68% yield) with 5:1 *dr*, 94% *ee*. 1H NMR (400 MHz, CDCl3) δ 7.51 – 7.12 (m, 2 H), 7.02 – 6.93 (m, 2 H), 4.27 (d, *J* = 22.6 Hz, 2 H), 3.55 (t, *J* = 7.6 Hz, 1 H), 2.42 – 2.18 (m, 3 H), 2.20 – 2.18 (m, 1 H), 1.85 – 1.77 (m, 1 H), 1.66 – 1.60 (m, 1 H), 1.48 (s, 9 H), 1.45 (d, *J* = 5.1 Hz, 1 H), 1.30 – 1.21 (m, 1 H). 13C NMR (101 MHz, CDCl3) δ 161.49 (d, *J* = 244.7 Hz), 140.42 (dd, *J*F = 8.0 Hz), 129.30 (d, *J* = 8.0 Hz), 115.09 (d, *J* = 21.1 Hz), 114.67 (d, *J* = 21.1 Hz), 81.53, 79.87, 70.86, 59.99 (d, *J* = 59.3 Hz), 51.93 (d, *J* = 45.4 Hz), 44.43, 31.66, 28.28, 28.14 (d, *J* = 189.9 Hz). HRMS (ESI) calculated for [M+Na]+ = [C18H24NNaO3]+: 344.1632 found: 344.1633. Enantiomeric excess was determined by HPLC with a Chiralpak IF column (hexanes:2-propanol = 90:10, 1.0 mL/min, 210 nm); minor enantiomer Rt = 9.9 min, major enantiomer Rt = 11.1 min. [α]D20 = -8.0 (c = 0.3, CHCl3).

- 1. Synthesis of (1*R*,5*S*)-3-(3,4-dichlorophenyl)-8-azabicyclo[3.2.1]oct-2-ene(**21**) 4.

**4g** (716.2 mg, 2.0 mmol) was suspended in DCM (8 mL), and treated with TFA (4 mL) for 1 h. After the reaction was diluted by DCM, saturated aqueous NaHCO3 was added dropwise. The organic layer was separated and the aqueous layer was extracted with DCM. The combined organic layers were dried over Na2SO4 and concentrated in vacuo. The residue was purified by flash column chromatography to provide analytically pure product **5** as a white solid (505.8 mg, >99% yield) with 87% *ee*. Mp: 120-122 oC. 1H NMR (400 MHz, CDCl3) δ 7.41 – 7.39 (m, 2 H), 7.26 – 7.15 (m, 2 H), 6.25 (d, *J* = 5.8 Hz, 1 H), 4.28 (q, *J* = 5.8 Hz, 2 H), 3.30 (dd, *J* = 17.8, 4.7 Hz, 1 H), 2.46 – 2.31 (m, 3 H), 2.20 (dd, *J* = 12.1, 9.3 Hz, 1 H), 1.85 – 1.82 (m, 1 H). 13C NMR (101 MHz, CDCl3) δ 138.15, 132.90, 132.82, 132.32, 130.49, 127.18, 124.47, 124.02, 53.46, 52.99, 35.41, 33.20, 27.98. HRMS (ESI) calculated for [M+H]+ = [C13H14Cl2N]+: 254.0498 found: 254.0505. Enantiomeric excess was determined by HPLC with a Chiralpak IF column (hexanes:2-propanol = 90:10, 1.0 mL/min, 254 nm); minor enantiomer Rt = 6.7 min, major enantiomer Rt = 9.2 min. [α]D20 = 5.9 (c = 0.3, CHCl3).

(*Note: Determination of ee value of 21: Dissolve 21, NEt3 (1.0 eq) and Di-tert-butyl decarbonate (1.0 eq) in THF and stir for 1 h, the equivalent is converted into* ***4j****, and then the ee value is determined.*)

- 1. Synthesis of (1*R*,5*S*)-3-(4-fluorophenyl)-8-azabicyclo[3.2.1]oct-2-ene(**22**) 4.

**4c** (606.4 mg, 2.0 mmol) was suspended in DCM (6 mL), and treated with TFA (2 mL) for 1 h. After the reaction was diluted by DCM, saturated aqueous NaHCO3 was added dropwise. The organic layer was separated and the aqueous layer was extracted with DCM. The combined organic layers were dried over Na2SO4 and concentrated in vacuo. The residue was purified by flash column chromatography to provide analytically pure product **5** as a yellow solid (406.2 mg, >99% yield) with 93% *ee*. Mp: 34-36 oC. 1H NMR (400 MHz, CDCl3) δ 7.32 – 7.25 (m, 2 H), 6.96 (t, *J* = 8.7 Hz, 2 H), 6.37 – 6.35 (m, 1 H), 3.86 – 3.77 (m, 2 H), 2.81 (dd, *J* = 17.1, 4.8 Hz, 1 H), 2.18 (d, *J* = 17.0 Hz, 1 H), 2.11 – 2.02 (m, 1 H), 2.00 – 1.94 (m, 1 H), 1.92 – 1.83 (m, 2 H), 1.66 – 1.59 (m, 1 H). 13C NMR (101 MHz, CDCl3) δ 161.99 (d, *J* = 246.0 Hz), 136.42, 131.40, 130.23 (d, *J* = 1.7 Hz), 126.13 (d, *J* = 7.9 Hz), 114.96 (d, *J* = 21.2 Hz), 53.67, 52.80, 37.84, 35.34, 30.03. HRMS (ESI) calculated for [M+H]+ = [C13H15FN]+: 204.1183 found: 204.1187. Enantiomeric excess was determined by HPLC with a Chiralpak IF column (hexanes:2-propanol = 90:10, 1.0 mL/min, 254 nm); major enantiomer Rt = 5.9 min, minor enantiomer Rt = 7.2 min. [α]D20 = 8.8 (c = 0.3, CHCl3).

(*Note: Determination of ee value of 22: Dissolve 22, NEt3 (1.0 eq) and Di-tert-butyl decarbonate (1.0 eq) in THF and stir for 1 h, the equivalent is converted into 4c, and then the ee value is determined.*)

1. **Bioactive investigations**

The cytotoxic effects of the newly synthesized compounds were evaluated against A549 cancer cell lines using by Cell Counting Kit-8 assay (CCK-8). Initially, the antitumor activities of these compounds were initially screened at the concentration of 20 μM, Subsequently, the half maximal inhibitory concentration (IC50) values of selected compounds with relatively strong activity, were determined by testing a series of concentration in the cancer cell lines.

**Table S2.** The cytotoxicity screen of representative compounds against A549 cancer cells.


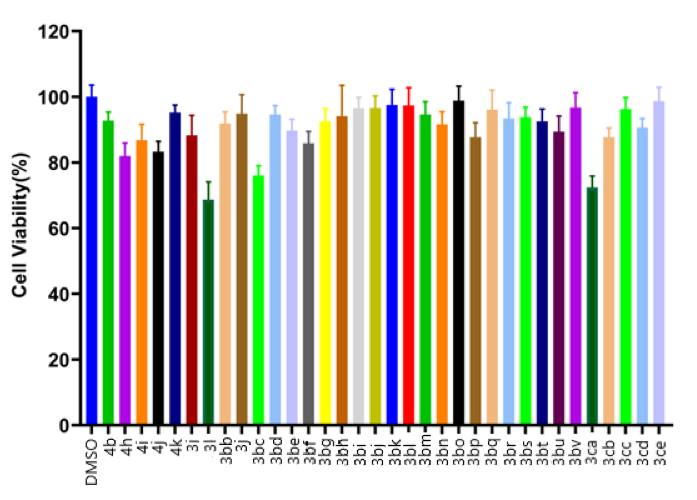


The preliminary screening results demonstrated that many of the compounds exhibited significant cytotoxic effects against cancer cells at 20 μM.

1. **Non-Linear effect experiments** 9

Non-Linear effect reactions were set up with standard substrates (0.1 mmol). In this case, the amount of palladium precatalyst and **M26** enantiomers were weighed on an analytical balance, and the amount of solvent was measured with volumetric syringe. The reactions were allowed to run for 36 h, purification as described in standard procedure. Each experiment was repeated three times. The relationship between enantiomeric excess of **M26** ligand and product is listed here.

**Table S3.** Non-Linear effect experiments

| **Ligand**  ***ee*** | **(*S,R*)- M26 amount**  **weighed (mg)** | **(*R*,*S*)- M26 amount**  **weighed (mg)** | **Product first *ee*** | **Product**  **second *ee*** | **Product**  **third *ee*** | **Product**  **average *ee*** |
| --- | --- | --- | --- | --- | --- | --- |
| 0 | 6.2 | 6.2 | 0.3% | 0.02% | 0.7% | 0.37% |
| 20% | 7.4 | 5.0 | 16.7% | 18.4% | 14.5% | 16.5% |
| 40% | 8.7 | 3.7 | 37.7% | 39.7% | 36.2% | 37.9% |
| 60% | 9.9 | 2.5 | 50.1% | 50.7% | 53.7% | 51.5% |
| 80% | 11.2 | 1.2 | 72.5% | 70.6% | 70.3% | 71.1% |
| 100% | 12.4 | 0 | 90.5% | 90.6% | 90.4% | 90.5% |

1. **Kinetic Studies: Kinetic Orders in Palladium/Ming-Phos-catalyzed enantioselective *β*−H elimination reaction**

**A: Kinetic Order in Catalyst**

**General procedure:** Catalyst was measured from a stock solution (52.0 mg Pd2(dba)3·CHCl3 and 124.0 mg **M26** dissolved in 2.5 mL DMA using a Hamilton gastight syringe into 10 mL oven-dried sealed tube. Solvent was removed under reduced pressure, to the oven-dried sealed tube containing the resulting solid was added substrate **1c** (54.0 mg, 0.10 mmol, 1.0 equiv.), Cs2CO3 (130.4 mg, 0.4 mmol, 4.0 equiv.). The flask was evacuated and refilled with argon. Then, **2a** (18.8 mg, 0.12 mmol, 1.2 equiv.), DMA (1 mL), dimethoxybenzene as internal were added to the tube. The tube was tightly sealed with a Teflon-lined screw cap and heated to 50 °C in a preheated aluminum heating block. After the desired reaction time (measured precisely by a timer), the reaction was flash-cooled in a liquid nitrogen bath until frozen solid (about 45 s). The reaction was then allowed to warm back up to room temperature and analyzed by GC.

**B: Kinetic Order in *N*-sulfonylhydrazone 1c**

**General procedure:** Catalyst was measured from a stock solution (52.0 mg Pd2(dba)3·CHCl3 and 124.0 mg **M26** dissolved in 2.5 mL DMA using a Hamilton gastight syringe into 10 mL oven-dried sealed tube. Solvent was removed under reduced pressure, to the oven-dried sealed tube containing the resulting solid was added substrate **1c** (from 0.06 to 0.1 mmol)), Cs2CO3 (130.4 mg, 0.4 mmol, 4.0 equiv.). The flask was evacuated and refilled with argon. Then, **2a** (18.8 mg, 0.12 mmol, 1.2 equiv.), DMA (1 mL), dimethoxybenzene as internal were added to the tube. The tube was tightly sealed with a Teflon-lined screw cap and heated to 50 °C in a preheated aluminum heating block. After the desired reaction time (measured precisely by a timer), the reaction was flash-cooled in a liquid nitrogen bath until frozen solid (about 45 s). The reaction was then allowed to warm back up to room temperature and analyzed by GC.

**C: Kinetic Order in PhBr 2a**

**General procedure:** Catalyst was measured from a stock solution (52.0 mg Pd2(dba)3·CHCl3 and 124.0 mg **M26** dissolved in 2.5 mL DMA using a Hamilton gastight syringe into 10 mL oven-dried sealed tube. Solvent was removed under reduced pressure, to the oven-dried sealed tube containing the resulting solid was added substrate **1c** (0.1 mmol), Cs2CO3 (130.4 mg, 0.4 mmol, 4.0 equiv.). The flask was evacuated and refilled with argon. Then, **2a** (from 0.11 to 0.15 mmol), DMA (1 mL), dimethoxybenzene as internal were added to the tube. The tube was tightly sealed with a Teflon-lined screw cap and heated to 50 °C in a preheated aluminum heating block. After the desired reaction time (measured precisely by a timer), the reaction was flash-cooled in a liquid nitrogen bath until frozen solid (about 45 s). The reaction was then allowed to warm back up to room temperature and analyzed by GC.

1. **Kinetic Data: Deuterium Kinetic Isotope Experiment** 9

**Side-by- side reaction**

**General procedure:**

An oven-dried sealed tube containing the resulting solid was charged with substrate **1c or [D]-1c** (0.10 mmol, 1.0 equiv.), Pd2(dba)3·CHCl3 (5.2 mg, 0.005 mmol), **M26** (12.4 mg, 0.02 mmol), Cs2CO3 (130.4 mg, 0.4 mmol, 4.0 equiv.). The flask was evacuated and refilled with argon. Then, **2a** (18.8 mg, 0.12 mmol, 1.2 equiv.), DMA (1 mL), dimethoxybenzene as internal were added to the tube. The tube was tightly sealed with a Teflon-lined screw cap and heated to 50 °C in a preheated aluminum heating block. After the desired reaction time (measured precisely by a timer), the reaction was flash-cooled in a liquid nitrogen bath until frozen solid (about 45 s). The reaction was then allowed to warm back up to room temperature and analyzed by GC.

**Table S4**. Yield(%) verse time (h) using **1c** as a substrate.

| Entry | Concentration of catalyst | Reaction time (min) | Yield (%) |
| --- | --- | --- | --- |
| 1 | 5.0 mol% | 120 | 8.3 |
| 2 | 180 | 11.8 |
| 3 | 240 | 16.1 |
| 4 | 300 | 20.2 |
| 5 | 360 | 24.2 |

**Figure S1**. Plot of yield(%) verse time (h) using **1c** as a substrate.

**Table S5**. Yield(%) verse time (h) using [**D]-1c** as a substrate.

| Entry | Concentration of catalyst | Reaction time (h) | Average Yield (%) |
| --- | --- | --- | --- |
| 1 | 5.0 mol% | 120 | 6.0 |
| 2 | 180 | 9.2 |
| 3 | 240 | 13.1 |
| 4 | 300 | 16.8 |
| 5 | 360 | 20.7 |

**Figure S2**. Plot of yield(%) verse time (h) using **2a** as a substrate.

**Intermolecular competition reaction:**

**General procedure:** The general procedure for reaction monitoring by 1H NMR was used, using 0.5 equiv of both **1c** and **[D]-1c**. The KIE value was obtained using the generation of (**3a** or **[D]-3a]**).

**Table S6**. Intermolecular competition experiments

**Figure S3**. Intermolecular competition reaction monitoring by 1H NMR.

1. **Hammett plots of aryl bromides**

The general procedure for rate determination was followed using 4-methoxybromobenzene (22.4 mg, 0.12 mmol, 1.2 equiv), *p*-Bromotoluene (20.5 mg, 0.12 mmol, 1.2 equiv), Bromobenzene (18.8 mg, 0.12 mmol, 1.2 equiv), 4-fluorobromobenzene (21.0, 0.12 mmol, 1.2 equiv), 4-chlorobromobenzene (23.0 mg, 0.12 mmol, 1.2 equiv), and 4-(trifluoromethyl)bromobenzene (27.0 mg, 0.12 mmol, 1.2 equiv). The quantitative rates of hydroaralation of these substrates are provided below with a corresponding Hammett plot.

**Table S7**. Yield(%) verse time (h) using various para-substituted aryl bromides as substrates.

| R | σ | Rate (mM/min) |
| --- | --- | --- |
| OMe | -0.27 | 0.0609 |
| Me | -0.17 | 0.0649 |
| H | 0 | 0.0662 |
| F | 0.062 | 0.0662 |
| Cl | 0.227 | 0.0675 |
| CF3 | 0.54 | 0.0705 |

1. **X-Ray Structure and Crystal Data of 3bd**

**Table 1 Crystal data and structure refinement for 3bd.**

| Identification code | 3bd |
| --- | --- |
| Empirical formula | C22H22FNO3' |
| Formula weight | 367.40 |
| Temperature/K | 183(18) |
| Crystal system | monoclinic |
| Space group | P 1 21 1 |
| a/Å | 6.07440(10) |
| b/Å | 8.1716(2) |
| c/Å | 36.5392(7) |
| α/° | 90 |
| β/° | 90 |
| γ/° | 90 |
| Volume/Å3 | 1813.72(6) |
| Z | 4 |
| ρcalcg/cm3 | 1.346 |
| μ/mm‑1 | 0.788 |
| F(000) | 776 |
| Crystal size/mm3 | 0.32 |
| Radiation | CuKα (λ = 1.54184) |
| 2Θ range for data collection/° | 7.26 to 134.158 |
| Index ranges | -7 ≤ h ≤ 7, -9 ≤ k ≤ 9, -43 ≤ l ≤ 43 |
| Reflections collected | 42947 |
| Independent reflections | 6469 [Rint = 0.0520, Rsigma = 0.0303] |
| Data/restraints/parameters | 6469/1/489 |
| Goodness-of-fit on F2 | 1.038 |
| Final R indexes [I>=2σ (I)] | R1 = 0.0359, wR2 = 0.0914 |
| Final R indexes [all data] | R1 = 0.0376, wR2 = 0.0926 |
| Largest diff. peak/hole / e Å-3 | 0.164/-0.214 |
| Flack parameter | -0.05(10) |

**Table 2 Fractional Atomic Coordinates and Equivalent Isotropic Displacement Parameters (Å2) for 3bd. Ueq is defined as 1/3 of of the trace of the orthogonalised UIJ tensor.**

| **Atom** | ***x*** | ***y*** | ***z*** | **U(eq)** |
| --- | --- | --- | --- | --- |
| F1 | 0.5120(4) | 0.5406(4) | -0.01091(5) | 0.0557(7) |
| O1 | 1.0490(3) | 0.4569(3) | 0.20218(5) | 0.0238(5) |
| O2 | 0.7142(3) | 0.3481(3) | 0.21486(6) | 0.0270(5) |
| O3 | 0.8446(3) | 0.7283(3) | 0.00621(5) | 0.0343(6) |
| N1 | 0.7628(4) | 0.6254(3) | 0.21045(7) | 0.0208(6) |
| C1 | 0.9764(5) | 0.2622(5) | 0.13571(8) | 0.0371(8) |
| H1 | 0.846263 | 0.316281 | 0.143554 | 0.045 |
| C2 | 0.9957(6) | 0.2055(6) | 0.09977(10) | 0.0505(11) |
| H2 | 0.876587 | 0.220252 | 0.083255 | 0.061 |
| C3 | 1.1833(6) | 0.1293(6) | 0.08793(10) | 0.0524(11) |
| H3 | 1.194322 | 0.092163 | 0.063360 | 0.063 |
| C4 | 1.3566(6) | 0.1065(5) | 0.11192(11) | 0.0491(10) |
| H4 | 1.486579 | 0.052510 | 0.103951 | 0.059 |
| C5 | 1.3404(5) | 0.1623(5) | 0.14753(9) | 0.0359(8) |
| H5 | 1.461277 | 0.148439 | 0.163738 | 0.043 |
| C6 | 1.1513(4) | 0.2380(4) | 0.15991(8) | 0.0259(6) |
| C7 | 1.1412(4) | 0.2947(4) | 0.19928(8) | 0.0242(6) |
| H7A | 1.050210 | 0.217313 | 0.213632 | 0.029 |
| H7B | 1.291450 | 0.294499 | 0.209785 | 0.029 |
| C8 | 0.8314(4) | 0.4660(4) | 0.20947(7) | 0.0198(6) |
| C9 | 0.8783(4) | 0.7600(4) | 0.19185(7) | 0.0216(6) |
| H9 | 1.038481 | 0.762012 | 0.198151 | 0.026 |
| C10 | 0.7564(5) | 0.9079(4) | 0.20768(9) | 0.0263(7) |
| H10A | 0.759565 | 1.001366 | 0.190433 | 0.032 |
| H10B | 0.821917 | 0.942489 | 0.231249 | 0.032 |
| C11 | 0.5184(5) | 0.8443(4) | 0.21313(9) | 0.0283(7) |
| H11A | 0.469450 | 0.861275 | 0.238691 | 0.034 |
| H11B | 0.415105 | 0.901241 | 0.196490 | 0.034 |
| C12 | 0.5299(5) | 0.6623(4) | 0.20410(8) | 0.0231(7) |
| H12 | 0.433956 | 0.597512 | 0.220984 | 0.028 |
| C13 | 0.4770(4) | 0.6230(4) | 0.16411(7) | 0.0265(7) |
| H13A | 0.457028 | 0.503331 | 0.161538 | 0.032 |
| H13B | 0.336123 | 0.676179 | 0.157468 | 0.032 |
| C14 | 0.6512(4) | 0.6780(4) | 0.13795(7) | 0.0228(6) |
| C15 | 0.8418(4) | 0.7432(4) | 0.15091(8) | 0.0252(6) |
| H15 | 0.952426 | 0.778289 | 0.134299 | 0.030 |
| C16 | 0.6098(4) | 0.6482(4) | 0.09838(8) | 0.0253(6) |
| C17 | 0.4388(5) | 0.5474(5) | 0.08741(8) | 0.0380(9) |
| H17 | 0.342832 | 0.502288 | 0.105298 | 0.046 |
| C18 | 0.4050(6) | 0.5109(6) | 0.05055(9) | 0.0476(10) |
| H18 | 0.286421 | 0.442326 | 0.043340 | 0.057 |
| C19 | 0.5432(6) | 0.5742(5) | 0.02515(8) | 0.0369(8) |
| C20 | 0.7166(5) | 0.6760(4) | 0.03462(8) | 0.0265(7) |
| C21 | 0.7490(4) | 0.7129(4) | 0.07118(8) | 0.0256(7) |
| H21 | 0.866832 | 0.782975 | 0.078029 | 0.031 |
| C22 | 1.0168(6) | 0.8394(6) | 0.01461(9) | 0.0446(10) |
| H22A | 1.100752 | 0.863529 | -0.007646 | 0.067 |
| H22B | 1.114522 | 0.790465 | 0.032925 | 0.067 |
| H22C | 0.953951 | 0.940909 | 0.024341 | 0.067 |
| F2 | 0.4867(4) | 0.4753(3) | 0.51084(4) | 0.0473(6) |
| O4 | 0.2748(3) | 0.6495(3) | 0.28557(6) | 0.0272(5) |
| O5 | -0.0611(3) | 0.5421(3) | 0.29886(5) | 0.0226(5) |
| O6 | 0.1559(3) | 0.2832(3) | 0.49392(5) | 0.0323(5) |
| N2 | 0.2225(4) | 0.3741(3) | 0.29045(7) | 0.0202(6) |
| C23 | 0.0168(5) | 0.7413(5) | 0.36498(8) | 0.0333(8) |
| H23 | 0.147299 | 0.689223 | 0.356607 | 0.040 |
| C24 | 0.0056(6) | 0.7945(6) | 0.40084(9) | 0.0437(10) |
| H24 | 0.124349 | 0.775443 | 0.417211 | 0.052 |
| C25 | -0.1817(7) | 0.8763(5) | 0.41255(10) | 0.0506(11) |
| H25 | -0.190183 | 0.915532 | 0.436983 | 0.061 |
| C26 | -0.3558(7) | 0.9011(6) | 0.38894(10) | 0.0508(10) |
| H26 | -0.482440 | 0.958964 | 0.397021 | 0.061 |
| C27 | -0.3461(5) | 0.8414(5) | 0.35326(9) | 0.0364(8) |
| H27 | -0.468352 | 0.854961 | 0.337343 | 0.044 |
| C28 | -0.1579(4) | 0.7619(4) | 0.34090(8) | 0.0246(6) |
| C29 | -0.1519(5) | 0.7055(4) | 0.30182(8) | 0.0258(7) |
| H29A | -0.303051 | 0.706340 | 0.291676 | 0.031 |
| H29B | -0.061365 | 0.782159 | 0.287212 | 0.031 |
| C30 | 0.1577(4) | 0.5318(4) | 0.29148(7) | 0.0203(6) |
| C31 | 0.4578(4) | 0.3353(4) | 0.29646(7) | 0.0205(6) |
| H31 | 0.557270 | 0.403993 | 0.280981 | 0.025 |
| C32 | 0.4608(5) | 0.1537(4) | 0.28493(8) | 0.0248(6) |
| H32A | 0.577895 | 0.093221 | 0.298043 | 0.030 |
| H32B | 0.485340 | 0.142939 | 0.258249 | 0.030 |
| C33 | 0.2309(5) | 0.0891(4) | 0.29567(9) | 0.0276(7) |
| H33A | 0.155877 | 0.039901 | 0.274273 | 0.033 |
| H33B | 0.242504 | 0.005648 | 0.315214 | 0.033 |
| C34 | 0.1045(4) | 0.2407(4) | 0.30940(7) | 0.0218(6) |
| H34 | -0.053602 | 0.236639 | 0.301837 | 0.026 |
| C35 | 0.1267(4) | 0.2637(4) | 0.35106(7) | 0.0234(6) |
| H35A | 0.013235 | 0.342108 | 0.359492 | 0.028 |
| H35B | 0.098556 | 0.157699 | 0.363321 | 0.028 |
| C36 | 0.3512(4) | 0.3258(4) | 0.36236(7) | 0.0223(6) |
| C37 | 0.5054(4) | 0.3544(4) | 0.33694(8) | 0.0237(6) |
| H37 | 0.648263 | 0.387639 | 0.344486 | 0.028 |
| C38 | 0.3894(4) | 0.3627(4) | 0.40180(7) | 0.0226(6) |
| C39 | 0.2531(4) | 0.2970(4) | 0.42884(7) | 0.0235(6) |
| H39 | 0.137176 | 0.225237 | 0.421987 | 0.028 |
| C40 | 0.2838(5) | 0.3345(4) | 0.46556(8) | 0.0264(7) |
| C41 | 0.4565(5) | 0.4374(5) | 0.47485(8) | 0.0323(8) |
| C42 | 0.5902(5) | 0.5069(5) | 0.44910(8) | 0.0382(8) |
| H42 | 0.704001 | 0.580187 | 0.456172 | 0.046 |
| C43 | 0.5575(5) | 0.4689(5) | 0.41244(8) | 0.0340(8) |
| H43 | 0.650692 | 0.515776 | 0.394386 | 0.041 |
| C44 | -0.0164(6) | 0.1724(6) | 0.48570(9) | 0.0434(9) |
| H44A | -0.116342 | 0.222293 | 0.467840 | 0.065 |
| H44B | -0.097908 | 0.146680 | 0.508125 | 0.065 |
| H44C | 0.045676 | 0.071668 | 0.475460 | 0.065 |

| **Table 3 Anisotropic Displacement Parameters (Å2) for 3bd. The Anisotropic displacement factor exponent takes the form: -2π2[h2a*2U11+2hka*b*U12+…].** | | | | | | | |
| --- | --- | --- | --- | --- | --- | --- | --- |
| **Atom** | **U11** | **U22** | **U33** | **U23** | | **U13** | **U12** |
| F1 | 0.0702(13) | 0.0802(19) | 0.0169(10) | -0.0071(11) | | -0.0002(10) | -0.0319(14) |
| O1 | 0.0231(9) | 0.0229(12) | 0.0253(10) | 0.0011(9) | | 0.0025(8) | -0.0004(9) |
| O2 | 0.0288(10) | 0.0236(12) | 0.0286(12) | 0.0025(10) | | 0.0061(9) | -0.0044(9) |
| O3 | 0.0451(11) | 0.0374(14) | 0.0205(11) | 0.0011(11) | | 0.0070(9) | -0.0082(12) |
| N1 | 0.0235(12) | 0.0173(14) | 0.0216(13) | -0.0008(10) | | 0.0043(10) | -0.0036(10) |
| C1 | 0.0348(15) | 0.051(2) | 0.0252(16) | -0.0051(18) | | 0.0024(12) | -0.0045(19) |
| C2 | 0.0500(19) | 0.072(3) | 0.0297(18) | -0.009(2) | | -0.0012(15) | -0.020(2) |
| C3 | 0.066(2) | 0.057(3) | 0.0343(19) | -0.021(2) | | 0.0174(18) | -0.022(2) |
| C4 | 0.058(2) | 0.037(2) | 0.052(2) | -0.009(2) | | 0.0223(18) | 0.0015(19) |
| C5 | 0.0384(16) | 0.0276(18) | 0.0417(19) | 0.0014(17) | | 0.0086(15) | 0.0040(16) |
| C6 | 0.0302(13) | 0.0217(16) | 0.0259(15) | 0.0018(14) | | 0.0029(11) | -0.0016(14) |
| C7 | 0.0268(13) | 0.0238(16) | 0.0220(14) | 0.0017(13) | | -0.0010(11) | 0.0028(12) |
| C8 | 0.0236(13) | 0.0203(16) | 0.0154(13) | -0.0024(12) | | 0.0022(10) | 0.0000(12) |
| C9 | 0.0218(11) | 0.0226(16) | 0.0204(14) | 0.0014(13) | | -0.0012(10) | -0.0057(13) |
| C10 | 0.0318(17) | 0.0210(16) | 0.0261(15) | 0.0007(13) | | -0.0004(13) | -0.0022(12) |
| C11 | 0.0259(14) | 0.0265(17) | 0.0324(16) | -0.0010(14) | | 0.0077(12) | -0.0010(13) |
| C12 | 0.0226(13) | 0.0258(16) | 0.0208(15) | 0.0000(13) | | 0.0042(11) | -0.0016(12) |
| C13 | 0.0227(12) | 0.0368(17) | 0.0201(13) | -0.0004(12) | | 0.0026(10) | -0.0032(12) |
| C14 | 0.0267(13) | 0.0249(16) | 0.0168(14) | -0.0005(13) | | 0.0029(11) | 0.0004(13) |
| C15 | 0.0279(12) | 0.0249(15) | 0.0228(14) | 0.0031(13) | | 0.0057(10) | -0.0046(13) |
| C16 | 0.0286(13) | 0.0269(16) | 0.0205(14) | 0.0014(13) | | 0.0020(11) | 0.0005(13) |
| C17 | 0.0404(17) | 0.050(2) | 0.0239(16) | 0.0019(16) | | 0.0034(13) | -0.0180(17) |
| C18 | 0.051(2) | 0.066(3) | 0.0260(17) | -0.002(2) | | -0.0022(14) | -0.031(2) |
| C19 | 0.0490(19) | 0.046(2) | 0.0162(15) | -0.0030(16) | | -0.0002(13) | -0.0070(18) |
| C20 | 0.0332(14) | 0.0259(17) | 0.0203(14) | 0.0035(14) | | 0.0040(11) | -0.0014(13) |
| C21 | 0.0305(14) | 0.0243(16) | 0.0222(14) | 0.0002(13) | | 0.0022(11) | -0.0030(12) |
| C22 | 0.0440(17) | 0.062(3) | 0.0279(16) | 0.0087(19) | | 0.0049(14) | -0.020(2) |
| F2 | 0.0627(12) | 0.0600(15) | 0.0192(10) | -0.0050(10) | | -0.0004(9) | -0.0216(12) |
| O4 | 0.0307(10) | 0.0218(12) | 0.0291(12) | 0.0007(10) | | 0.0088(9) | -0.0045(9) |
| O5 | 0.0211(9) | 0.0206(11) | 0.0262(10) | -0.0019(9) | | 0.0022(8) | -0.0003(8) |
| O6 | 0.0406(11) | 0.0351(13) | 0.0214(11) | 0.0020(11) | | 0.0063(8) | -0.0089(11) |
| N2 | 0.0181(11) | 0.0242(15) | 0.0183(12) | 0.0011(10) | | 0.0008(9) | 0.0003(10) |
| C23 | 0.0282(13) | 0.042(2) | 0.0294(16) | -0.0041(17) | | 0.0009(12) | -0.0048(17) |
| C24 | 0.0510(18) | 0.055(3) | 0.0254(16) | -0.0029(18) | | 0.0000(14) | -0.020(2) |
| C25 | 0.076(3) | 0.045(3) | 0.0314(19) | -0.0127(19) | | 0.0180(18) | -0.020(2) |
| C26 | 0.070(2) | 0.038(2) | 0.045(2) | -0.007(2) | | 0.0272(19) | 0.010(2) |
| C27 | 0.0425(17) | 0.0321(19) | 0.0346(17) | 0.0027(16) | | 0.0094(14) | 0.0076(17) |
| C28 | 0.0292(13) | 0.0194(15) | 0.0254(15) | 0.0009(14) | | 0.0059(11) | -0.0056(13) |
| C29 | 0.0277(13) | 0.0228(16) | 0.0269(15) | 0.0022(13) | | 0.0019(12) | 0.0038(12) |
| C30 | 0.0217(13) | 0.0262(17) | 0.0129(13) | 0.0013(12) | | 0.0024(10) | -0.0035(12) |
| C31 | 0.0197(12) | 0.0229(16) | 0.0191(14) | -0.0008(12) | | 0.0041(10) | -0.0007(11) |
| C32 | 0.0290(14) | 0.0214(15) | 0.0241(14) | -0.0009(13) | | 0.0019(11) | 0.0037(12) |
| C33 | 0.0310(16) | 0.0219(17) | 0.0299(17) | -0.0010(14) | | 0.0006(13) | -0.0030(13) |
| C34 | 0.0213(11) | 0.0222(15) | 0.0219(14) | 0.0009(13) | | 0.0019(10) | -0.0046(13) |
| C35 | 0.0224(11) | 0.0293(16) | 0.0185(13) | 0.0023(13) | | 0.0006(10) | -0.0046(12) |
| C36 | 0.0227(12) | 0.0204(15) | 0.0237(15) | 0.0030(13) | | -0.0001(11) | -0.0005(12) |
| C37 | 0.0206(11) | 0.0281(15) | 0.0223(13) | -0.0014(11) | | 0.0000(10) | 0.0000(11) |
| C38 | 0.0242(12) | 0.0240(16) | 0.0197(14) | 0.0014(13) | | 0.0014(10) | 0.0016(13) |
| C39 | 0.0248(13) | 0.0238(16) | 0.0219(14) | 0.0000(13) | | -0.0003(11) | 0.0003(12) |
| C40 | 0.0319(14) | 0.0278(17) | 0.0194(14) | 0.0032(14) | | 0.0049(11) | 0.0040(14) |
| C41 | 0.0430(17) | 0.036(2) | 0.0180(15) | -0.0036(15) | | -0.0019(13) | -0.0091(16) |
| C42 | 0.0430(17) | 0.046(2) | 0.0260(16) | -0.0027(17) | | -0.0002(13) | -0.0188(17) |
| C43 | 0.0381(16) | 0.043(2) | 0.0209(15) | 0.0005(15) | | 0.0027(12) | -0.0153(16) |
| C44 | 0.0452(18) | 0.054(2) | 0.0306(17) | 0.0046(19) | | 0.0067(15) | -0.0166(19) |
| **Table 4 Bond Lengths for 3bd.** | | | | | | | |
| **Atom** | | **Atom** | **Length/Å** |  | **Atom** | **Atom** | **Length/Å** |
| F1 | | C19 | 1.359(4) |  | F2 | C41 | 1.363(3) |
| O1 | | C7 | 1.443(4) |  | O4 | C30 | 1.216(4) |
| O1 | | C8 | 1.350(3) |  | O5 | C29 | 1.449(4) |
| O2 | | C8 | 1.214(4) |  | O5 | C30 | 1.359(3) |
| O3 | | C20 | 1.365(3) |  | O6 | C40 | 1.361(3) |
| O3 | | C22 | 1.418(4) |  | O6 | C44 | 1.416(4) |
| N1 | | C8 | 1.368(4) |  | N2 | C30 | 1.348(4) |
| N1 | | C9 | 1.471(4) |  | N2 | C31 | 1.481(3) |
| N1 | | C12 | 1.465(4) |  | N2 | C34 | 1.477(4) |
| C1 | | H1 | 0.9500 |  | C23 | H23 | 0.9500 |
| C1 | | C2 | 1.397(5) |  | C23 | C24 | 1.382(4) |
| C1 | | C6 | 1.396(4) |  | C23 | C28 | 1.389(4) |
| C2 | | H2 | 0.9500 |  | C24 | H24 | 0.9500 |
| C2 | | C3 | 1.369(6) |  | C24 | C25 | 1.387(5) |
| C3 | | H3 | 0.9500 |  | C25 | H25 | 0.9500 |
| C3 | | C4 | 1.382(6) |  | C25 | C26 | 1.379(6) |
| C4 | | H4 | 0.9500 |  | C26 | H26 | 0.9500 |
| C4 | | C5 | 1.382(5) |  | C26 | C27 | 1.393(5) |
| C5 | | H5 | 0.9500 |  | C27 | H27 | 0.9500 |
| C5 | | C6 | 1.381(4) |  | C27 | C28 | 1.390(4) |
| C6 | | C7 | 1.512(4) |  | C28 | C29 | 1.501(4) |
| C7 | | H7A | 0.9900 |  | C29 | H29A | 0.9900 |
| C7 | | H7B | 0.9900 |  | C29 | H29B | 0.9900 |
| C9 | | H9 | 1.0000 |  | C31 | H31 | 1.0000 |
| C9 | | C10 | 1.531(4) |  | C31 | C32 | 1.542(4) |
| C9 | | C15 | 1.519(4) |  | C31 | C37 | 1.515(4) |
| C10 | | H10A | 0.9900 |  | C32 | H32A | 0.9900 |
| C10 | | H10B | 0.9900 |  | C32 | H32B | 0.9900 |
| C10 | | C11 | 1.549(4) |  | C32 | C33 | 1.544(4) |
| C11 | | H11A | 0.9900 |  | C33 | H33A | 0.9900 |
| C11 | | H11B | 0.9900 |  | C33 | H33B | 0.9900 |
| C11 | | C12 | 1.525(5) |  | C33 | C34 | 1.542(4) |
| C12 | | H12 | 1.0000 |  | C34 | H34 | 1.0000 |
| C12 | | C13 | 1.530(4) |  | C34 | C35 | 1.540(4) |
| C13 | | H13A | 0.9900 |  | C35 | H35A | 0.9900 |
| C13 | | H13B | 0.9900 |  | C35 | H35B | 0.9900 |
| C13 | | C14 | 1.495(4) |  | C35 | C36 | 1.513(4) |
| C14 | | C15 | 1.359(4) |  | C36 | C37 | 1.340(4) |
| C14 | | C16 | 1.488(4) |  | C36 | C38 | 1.490(4) |
| C15 | | H15 | 0.9500 |  | C37 | H37 | 0.9500 |
| C16 | | C17 | 1.385(5) |  | C38 | C39 | 1.396(4) |
| C16 | | C21 | 1.408(4) |  | C38 | C43 | 1.395(4) |
| C17 | | H17 | 0.9500 |  | C39 | H39 | 0.9500 |
| C17 | | C18 | 1.394(4) |  | C39 | C40 | 1.389(4) |
| C18 | | H18 | 0.9500 |  | C40 | C41 | 1.387(5) |
| C18 | | C19 | 1.354(5) |  | C41 | C42 | 1.367(4) |
| C19 | | C20 | 1.386(5) |  | C42 | H42 | 0.9500 |
| C20 | | C21 | 1.383(4) |  | C42 | C43 | 1.390(4) |
| C21 | | H21 | 0.9500 |  | C43 | H43 | 0.9500 |
| C22 | | H22A | 0.9800 |  | C44 | H44A | 0.9800 |
| C22 | | H22B | 0.9800 |  | C44 | H44B | 0.9800 |
| C22 | | H22C | 0.9800 |  | C44 | H44C | 0.9800 |

**Table 5 Bond Angles for 3bd.**

| **Atom** | **Atom** | **Atom** | **Angle/˚** |  | **Atom** | **Atom** | **Atom** | | **Angle/˚** |
| --- | --- | --- | --- | --- | --- | --- | --- | --- | --- |
| C8 | O1 | C7 | 116.4(2) |  | C30 | O5 | C29 | | 116.4(2) |
| C20 | O3 | C22 | 117.1(2) |  | C40 | O6 | C44 | | 117.2(2) |
| C8 | N1 | C9 | 123.7(2) |  | C30 | N2 | C31 | | 118.9(2) |
| C8 | N1 | C12 | 119.1(3) |  | C30 | N2 | C34 | | 123.4(2) |
| C12 | N1 | C9 | 103.5(2) |  | C34 | N2 | C31 | | 103.9(2) |
| C2 | C1 | H1 | 120.5 |  | C24 | C23 | H23 | | 119.2 |
| C6 | C1 | H1 | 120.5 |  | C24 | C23 | C28 | | 121.6(3) |
| C6 | C1 | C2 | 119.0(3) |  | C28 | C23 | H23 | | 119.2 |
| C1 | C2 | H2 | 119.4 |  | C23 | C24 | H24 | | 120.5 |
| C3 | C2 | C1 | 121.2(4) |  | C23 | C24 | C25 | | 119.0(3) |
| C3 | C2 | H2 | 119.4 |  | C25 | C24 | H24 | | 120.5 |
| C2 | C3 | H3 | 120.2 |  | C24 | C25 | H25 | | 119.8 |
| C2 | C3 | C4 | 119.7(3) |  | C26 | C25 | C24 | | 120.4(3) |
| C4 | C3 | H3 | 120.2 |  | C26 | C25 | H25 | | 119.8 |
| C3 | C4 | H4 | 120.1 |  | C25 | C26 | H26 | | 120.0 |
| C5 | C4 | C3 | 119.9(3) |  | C25 | C26 | C27 | | 120.1(3) |
| C5 | C4 | H4 | 120.1 |  | C27 | C26 | H26 | | 120.0 |
| C4 | C5 | H5 | 119.5 |  | C26 | C27 | H27 | | 119.9 |
| C6 | C5 | C4 | 121.0(3) |  | C28 | C27 | C26 | | 120.2(3) |
| C6 | C5 | H5 | 119.5 |  | C28 | C27 | H27 | | 119.9 |
| C1 | C6 | C7 | 121.9(3) |  | C23 | C28 | C27 | | 118.6(3) |
| C5 | C6 | C1 | 119.3(3) |  | C23 | C28 | C29 | | 123.2(3) |
| C5 | C6 | C7 | 118.8(3) |  | C27 | C28 | C29 | | 118.2(3) |
| O1 | C7 | C6 | 111.5(3) |  | O5 | C29 | C28 | | 111.3(3) |
| O1 | C7 | H7A | 109.3 |  | O5 | C29 | H29A | | 109.4 |
| O1 | C7 | H7B | 109.3 |  | O5 | C29 | H29B | | 109.4 |
| C6 | C7 | H7A | 109.3 |  | C28 | C29 | H29A | | 109.4 |
| C6 | C7 | H7B | 109.3 |  | C28 | C29 | H29B | | 109.4 |
| H7A | C7 | H7B | 108.0 |  | H29A | C29 | H29B | | 108.0 |
| O1 | C8 | N1 | 110.9(2) |  | O4 | C30 | O5 | | 124.0(3) |
| O2 | C8 | O1 | 124.2(3) |  | O4 | C30 | N2 | | 125.5(3) |
| O2 | C8 | N1 | 124.9(3) |  | N2 | C30 | O5 | | 110.5(3) |
| N1 | C9 | H9 | 111.7 |  | N2 | C31 | H31 | | 112.3 |
| N1 | C9 | C10 | 100.7(2) |  | N2 | C31 | C32 | | 100.2(3) |
| N1 | C9 | C15 | 108.5(2) |  | N2 | C31 | C37 | | 107.9(2) |
| C10 | C9 | H9 | 111.7 |  | C32 | C31 | H31 | | 112.3 |
| C15 | C9 | H9 | 111.7 |  | C37 | C31 | H31 | | 112.3 |
| C15 | C9 | C10 | 111.9(3) |  | C37 | C31 | C32 | | 111.3(3) |
| C9 | C10 | H10A | 111.0 |  | C31 | C32 | H32A | | 110.9 |
| C9 | C10 | H10B | 111.0 |  | C31 | C32 | H32B | | 110.9 |
| C9 | C10 | C11 | 103.6(3) |  | C31 | C32 | C33 | | 104.4(3) |
| H10A | C10 | H10B | 109.0 |  | H32A | C32 | H32B | | 108.9 |
| C11 | C10 | H10A | 111.0 |  | C33 | C32 | H32A | | 110.9 |
| C11 | C10 | H10B | 111.0 |  | C33 | C32 | H32B | | 110.9 |
| C10 | C11 | H11A | 110.8 |  | C32 | C33 | H33A | | 110.8 |
| C10 | C11 | H11B | 110.8 |  | C32 | C33 | H33B | | 110.8 |
| H11A | C11 | H11B | 108.8 |  | H33A | C33 | H33B | | 108.8 |
| C12 | C11 | C10 | 104.9(3) |  | C34 | C33 | C32 | | 105.0(3) |
| C12 | C11 | H11A | 110.8 |  | C34 | C33 | H33A | | 110.8 |
| C12 | C11 | H11B | 110.8 |  | C34 | C33 | H33B | | 110.8 |
| N1 | C12 | C11 | 102.1(3) |  | N2 | C34 | C33 | | 101.5(2) |
| N1 | C12 | H12 | 110.9 |  | N2 | C34 | H34 | | 111.2 |
| N1 | C12 | C13 | 108.1(2) |  | N2 | C34 | C35 | | 109.3(2) |
| C11 | C12 | H12 | 110.9 |  | C33 | C34 | H34 | | 111.2 |
| C11 | C12 | C13 | 113.7(3) |  | C35 | C34 | C33 | | 112.1(3) |
| C13 | C12 | H12 | 110.9 |  | C35 | C34 | H34 | | 111.2 |
| C12 | C13 | H13A | 108.9 |  | C34 | C35 | H35A | | 109.0 |
| C12 | C13 | H13B | 108.9 |  | C34 | C35 | H35B | | 109.0 |
| H13A | C13 | H13B | 107.7 |  | H35A | C35 | H35B | | 107.8 |
| C14 | C13 | C12 | 113.5(2) |  | C36 | C35 | C34 | | 112.9(2) |
| C14 | C13 | H13A | 108.9 |  | C36 | C35 | H35A | | 109.0 |
| C14 | C13 | H13B | 108.9 |  | C36 | C35 | H35B | | 109.0 |
| C15 | C14 | C13 | 119.9(2) |  | C37 | C36 | C35 | | 120.0(2) |
| C15 | C14 | C16 | 123.1(2) |  | C37 | C36 | C38 | | 121.7(3) |
| C16 | C14 | C13 | 116.9(2) |  | C38 | C36 | C35 | | 118.2(2) |
| C9 | C15 | H15 | 119.9 |  | C31 | C37 | H37 | | 119.2 |
| C14 | C15 | C9 | 120.2(2) |  | C36 | C37 | C31 | | 121.7(3) |
| C14 | C15 | H15 | 119.9 |  | C36 | C37 | H37 | | 119.2 |
| C17 | C16 | C14 | 120.3(3) |  | C39 | C38 | C36 | | 120.9(3) |
| C17 | C16 | C21 | 118.0(3) |  | C43 | C38 | C36 | | 120.6(3) |
| C21 | C16 | C14 | 121.5(3) |  | C43 | C38 | C39 | | 118.4(3) |
| C16 | C17 | H17 | 119.4 |  | C38 | C39 | H39 | | 119.4 |
| C16 | C17 | C18 | 121.1(3) |  | C40 | C39 | C38 | | 121.3(3) |
| C18 | C17 | H17 | 119.4 |  | C40 | C39 | H39 | | 119.4 |
| C17 | C18 | H18 | 120.4 |  | O6 | C40 | C39 | | 126.2(3) |
| C19 | C18 | C17 | 119.3(3) |  | O6 | C40 | C41 | | 115.6(3) |
| C19 | C18 | H18 | 120.4 |  | C41 | C40 | C39 | | 118.2(3) |
| F1 | C19 | C20 | 118.0(3) |  | F2 | C41 | C40 | | 118.4(3) |
| C18 | C19 | F1 | 120.0(3) |  | F2 | C41 | C42 | | 119.3(3) |
| C18 | C19 | C20 | 122.0(3) |  | C42 | C41 | C40 | | 122.2(3) |
| O3 | C20 | C19 | 115.5(3) |  | C41 | C42 | H42 | | 120.5 |
| O3 | C20 | C21 | 125.8(3) |  | C41 | C42 | C43 | | 119.0(3) |
| C21 | C20 | C19 | 118.7(3) |  | C43 | C42 | H42 | | 120.5 |
| C16 | C21 | H21 | 119.5 |  | C38 | C43 | H43 | | 119.6 |
| C20 | C21 | C16 | 120.9(3) |  | C42 | C43 | C38 | | 120.8(3) |
| C20 | C21 | H21 | 119.5 |  | C42 | C43 | H43 | | 119.6 |
| O3 | C22 | H22A | 109.5 |  | O6 | C44 | H44A | | 109.5 |
| O3 | C22 | H22B | 109.5 |  | O6 | C44 | H44B | | 109.5 |
| O3 | C22 | H22C | 109.5 |  | O6 | C44 | H44C | | 109.5 |
| H22A | C22 | H22B | 109.5 |  | H44A | C44 | H44B | | 109.5 |
| H22A | C22 | H22C | 109.5 |  | H44A | C44 | H44C | | 109.5 |
| H22B | C22 | H22C | 109.5 |  | H44B | C44 | H44C | | 109.5 |
| **Table 6 Torsion Angles for 3bd.** | | | | | | | | | |
| **Atom** | | **Atom** | **Atom** | **Atom** | | | | **Angle/˚** | |
| F1 | | C19 | C20 | O3 | | | | -2.1(5) | |
| F1 | | C19 | C20 | C21 | | | | 179.3(3) | |
| O3 | | C20 | C21 | C16 | | | | -178.2(3) | |
| N1 | | C9 | C10 | C11 | | | | -33.2(3) | |
| N1 | | C9 | C15 | C14 | | | | 31.6(4) | |
| N1 | | C12 | C13 | C14 | | | | -42.3(4) | |
| C1 | | C2 | C3 | C4 | | | | 0.5(7) | |
| C1 | | C6 | C7 | O1 | | | | -43.5(4) | |
| C2 | | C1 | C6 | C5 | | | | 1.5(6) | |
| C2 | | C1 | C6 | C7 | | | | -179.5(4) | |
| C2 | | C3 | C4 | C5 | | | | -0.7(7) | |
| C3 | | C4 | C5 | C6 | | | | 1.4(6) | |
| C4 | | C5 | C6 | C1 | | | | -1.7(6) | |
| C4 | | C5 | C6 | C7 | | | | 179.1(4) | |
| C5 | | C6 | C7 | O1 | | | | 135.5(3) | |
| C6 | | C1 | C2 | C3 | | | | -0.9(7) | |
| C7 | | O1 | C8 | O2 | | | | 2.7(4) | |
| C7 | | O1 | C8 | N1 | | | | -178.2(2) | |
| C8 | | O1 | C7 | C6 | | | | 95.6(3) | |
| C8 | | N1 | C9 | C10 | | | | -170.4(3) | |
| C8 | | N1 | C9 | C15 | | | | 72.0(3) | |
| C8 | | N1 | C12 | C11 | | | | 171.9(3) | |
| C8 | | N1 | C12 | C13 | | | | -68.0(4) | |
| C9 | | N1 | C8 | O1 | | | | 23.3(4) | |
| C9 | | N1 | C8 | O2 | | | | -157.6(3) | |
| C9 | | N1 | C12 | C11 | | | | -46.3(3) | |
| C9 | | N1 | C12 | C13 | | | | 73.9(3) | |
| C9 | | C10 | C11 | C12 | | | | 6.0(3) | |
| C10 | | C9 | C15 | C14 | | | | -78.6(4) | |
| C10 | | C11 | C12 | N1 | | | | 23.6(3) | |
| C10 | | C11 | C12 | C13 | | | | -92.6(3) | |
| C11 | | C12 | C13 | C14 | | | | 70.3(4) | |
| C12 | | N1 | C8 | O1 | | | | 157.1(2) | |
| C12 | | N1 | C8 | O2 | | | | -23.8(4) | |
| C12 | | N1 | C9 | C10 | | | | 50.1(3) | |
| C12 | | N1 | C9 | C15 | | | | -67.5(3) | |
| C12 | | C13 | C14 | C15 | | | | 5.1(5) | |
| C12 | | C13 | C14 | C16 | | | | -178.5(3) | |
| C13 | | C14 | C15 | C9 | | | | 0.1(5) | |
| C13 | | C14 | C16 | C17 | | | | -11.8(5) | |
| C13 | | C14 | C16 | C21 | | | | 171.9(3) | |
| C14 | | C16 | C17 | C18 | | | | -176.4(4) | |
| C14 | | C16 | C21 | C20 | | | | 176.0(3) | |
| C15 | | C9 | C10 | C11 | | | | 81.9(3) | |
| C15 | | C14 | C16 | C17 | | | | 164.5(3) | |
| C15 | | C14 | C16 | C21 | | | | -11.8(5) | |
| C16 | | C14 | C15 | C9 | | | | -176.0(3) | |
| C16 | | C17 | C18 | C19 | | | | 0.6(7) | |
| C17 | | C16 | C21 | C20 | | | | -0.4(5) | |
| C17 | | C18 | C19 | F1 | | | | -179.7(4) | |
| C17 | | C18 | C19 | C20 | | | | -0.7(7) | |
| C18 | | C19 | C20 | O3 | | | | 178.9(4) | |
| C18 | | C19 | C20 | C21 | | | | 0.3(6) | |
| C19 | | C20 | C21 | C16 | | | | 0.3(5) | |
| C21 | | C16 | C17 | C18 | | | | 0.0(6) | |
| C22 | | O3 | C20 | C19 | | | | 176.8(3) | |
| C22 | | O3 | C20 | C21 | | | | -4.7(5) | |
| F2 | | C41 | C42 | C43 | | | | -179.5(3) | |
| O6 | | C40 | C41 | F2 | | | | 1.4(5) | |
| O6 | | C40 | C41 | C42 | | | | -175.8(4) | |
| N2 | | C31 | C32 | C33 | | | | -32.2(3) | |
| N2 | | C31 | C37 | C36 | | | | 30.8(4) | |
| N2 | | C34 | C35 | C36 | | | | -37.9(3) | |
| C23 | | C24 | C25 | C26 | | | | 1.3(6) | |
| C23 | | C28 | C29 | O5 | | | | 44.7(4) | |
| C24 | | C23 | C28 | C27 | | | | 1.4(5) | |
| C24 | | C23 | C28 | C29 | | | | -179.9(3) | |
| C24 | | C25 | C26 | C27 | | | | 1.1(7) | |
| C25 | | C26 | C27 | C28 | | | | -2.4(6) | |
| C26 | | C27 | C28 | C23 | | | | 1.1(6) | |
| C26 | | C27 | C28 | C29 | | | | -177.7(4) | |
| C27 | | C28 | C29 | O5 | | | | -136.5(3) | |
| C28 | | C23 | C24 | C25 | | | | -2.6(6) | |
| C29 | | O5 | C30 | O4 | | | | -3.8(4) | |
| C29 | | O5 | C30 | N2 | | | | 178.3(3) | |
| C30 | | O5 | C29 | C28 | | | | -94.8(3) | |
| C30 | | N2 | C31 | C32 | | | | -168.7(3) | |
| C30 | | N2 | C31 | C37 | | | | 74.8(3) | |
| C30 | | N2 | C34 | C33 | | | | 173.9(3) | |
| C30 | | N2 | C34 | C35 | | | | -67.5(3) | |
| C31 | | N2 | C30 | O4 | | | | 24.4(4) | |
| C31 | | N2 | C30 | O5 | | | | -157.7(2) | |
| C31 | | N2 | C34 | C33 | | | | -46.7(3) | |
| C31 | | N2 | C34 | C35 | | | | 71.9(3) | |
| C31 | | C32 | C33 | C34 | | | | 4.9(3) | |
| C32 | | C31 | C37 | C36 | | | | -78.2(4) | |
| C32 | | C33 | C34 | N2 | | | | 24.4(3) | |
| C32 | | C33 | C34 | C35 | | | | -92.1(3) | |
| C33 | | C34 | C35 | C36 | | | | 73.9(3) | |
| C34 | | N2 | C30 | O4 | | | | 158.3(3) | |
| C34 | | N2 | C30 | O5 | | | | -23.8(4) | |
| C34 | | N2 | C31 | C32 | | | | 49.6(3) | |
| C34 | | N2 | C31 | C37 | | | | -66.9(3) | |
| C34 | | C35 | C36 | C37 | | | | -0.1(4) | |
| C34 | | C35 | C36 | C38 | | | | 176.4(3) | |
| C35 | | C36 | C37 | C31 | | | | 3.4(5) | |
| C35 | | C36 | C38 | C39 | | | | 19.4(4) | |
| C35 | | C36 | C38 | C43 | | | | -158.1(3) | |
| C36 | | C38 | C39 | C40 | | | | -178.2(3) | |
| C36 | | C38 | C43 | C42 | | | | 178.4(3) | |
| C37 | | C31 | C32 | C33 | | | | 81.7(3) | |
| C37 | | C36 | C38 | C39 | | | | -164.2(3) | |
| C37 | | C36 | C38 | C43 | | | | 18.3(5) | |
| C38 | | C36 | C37 | C31 | | | | -172.9(3) | |
| C38 | | C39 | C40 | O6 | | | | 177.1(3) | |
| C38 | | C39 | C40 | C41 | | | | -1.0(5) | |
| C39 | | C38 | C43 | C42 | | | | 0.7(5) | |
| C39 | | C40 | C41 | F2 | | | | 179.7(3) | |
| C39 | | C40 | C41 | C42 | | | | 2.5(6) | |
| C40 | | C41 | C42 | C43 | | | | -2.3(6) | |
| C41 | | C42 | C43 | C38 | | | | 0.6(6) | |
| C43 | | C38 | C39 | C40 | | | | -0.5(5) | |
| C44 | | O6 | C40 | C39 | | | | 4.5(5) | |
| C44 | | O6 | C40 | C41 | | | | -177.4(3) | |

1. **1H , 19F, 31P, 13C NMR and HPLC Spectra**


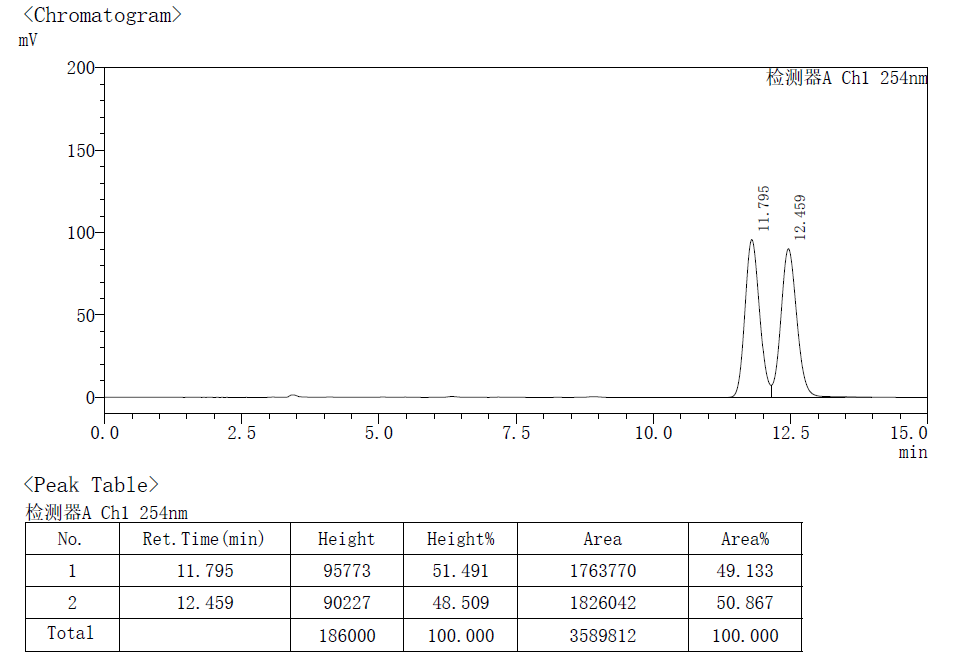


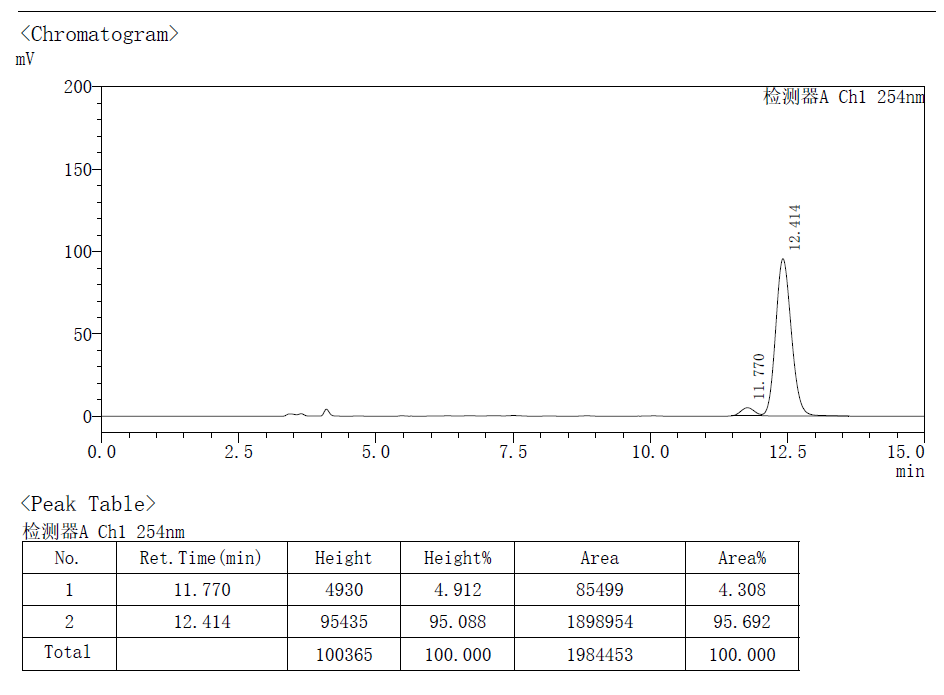


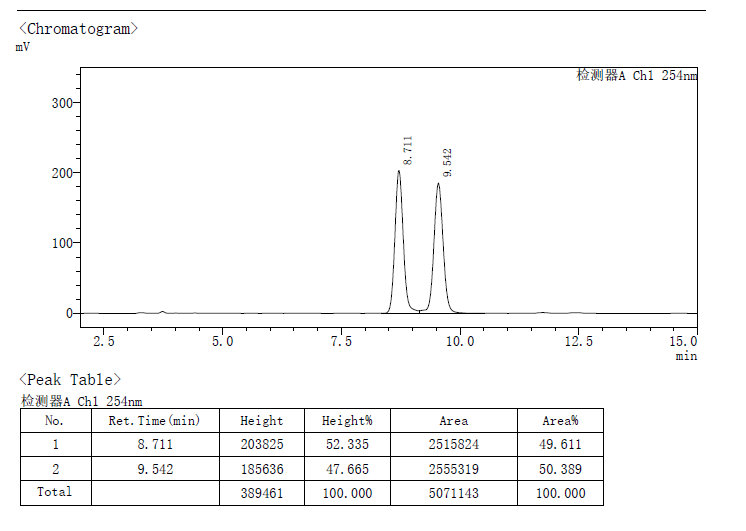


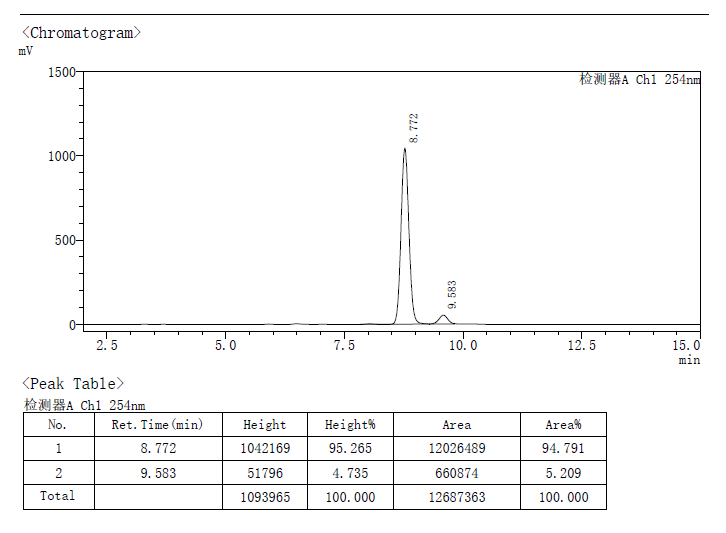


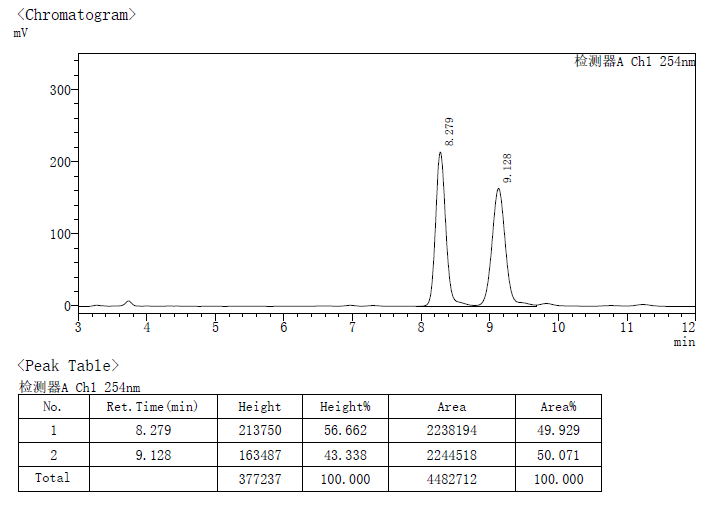


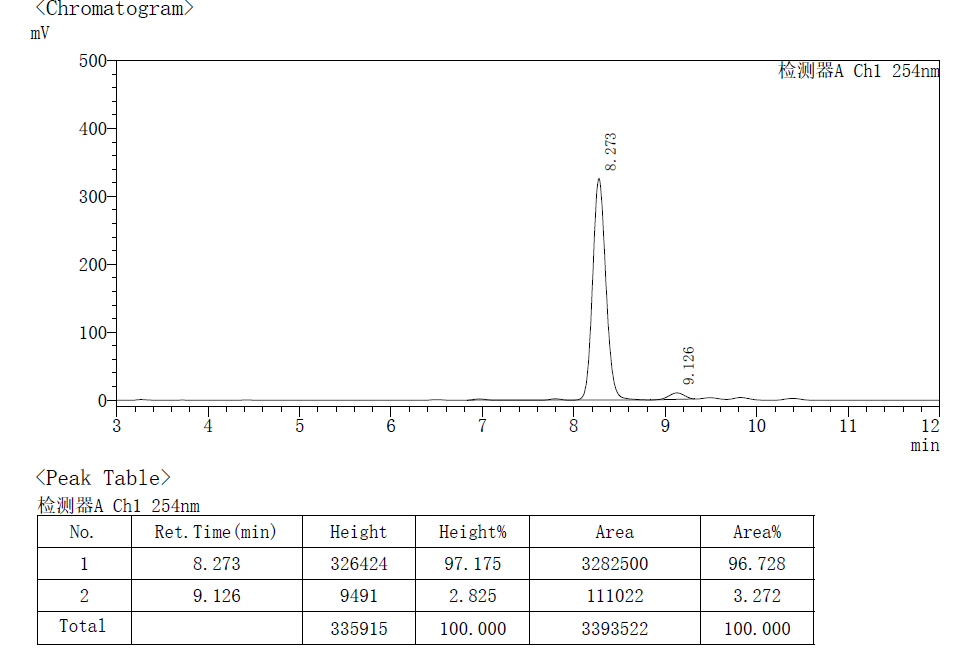


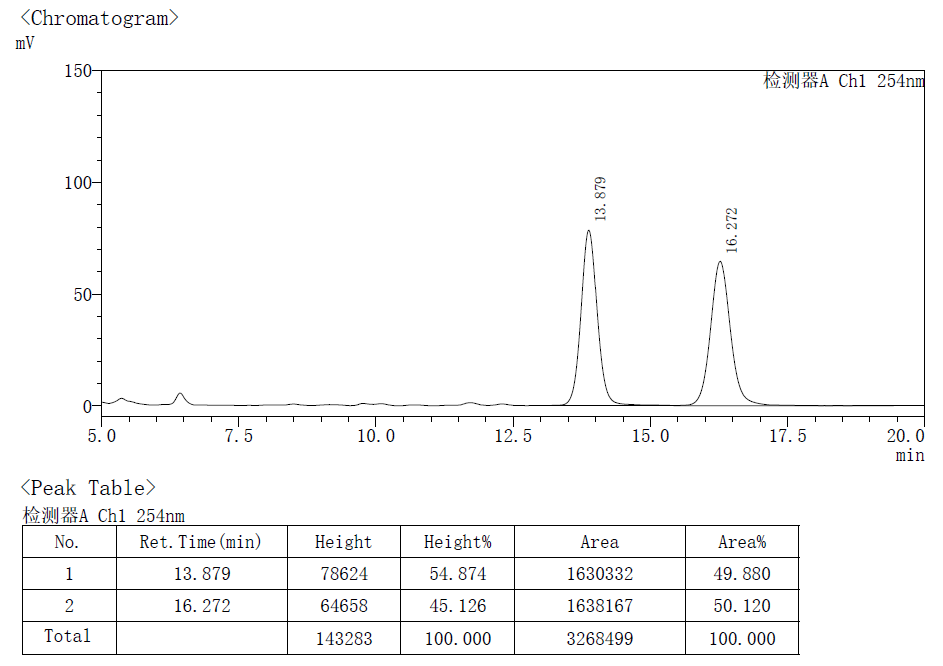


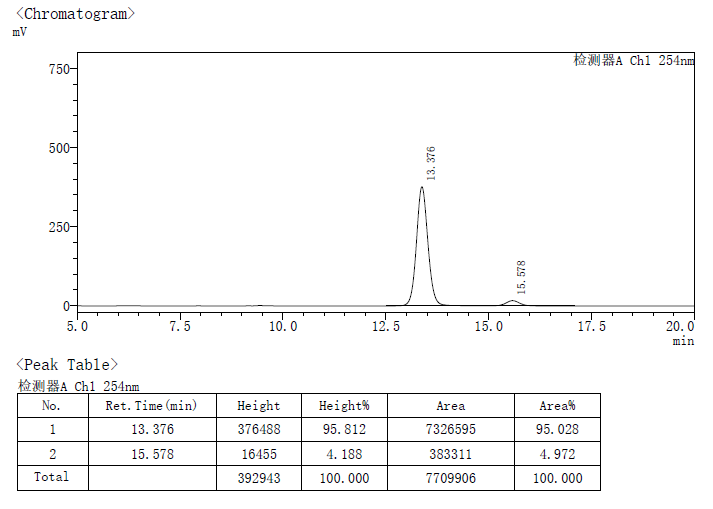


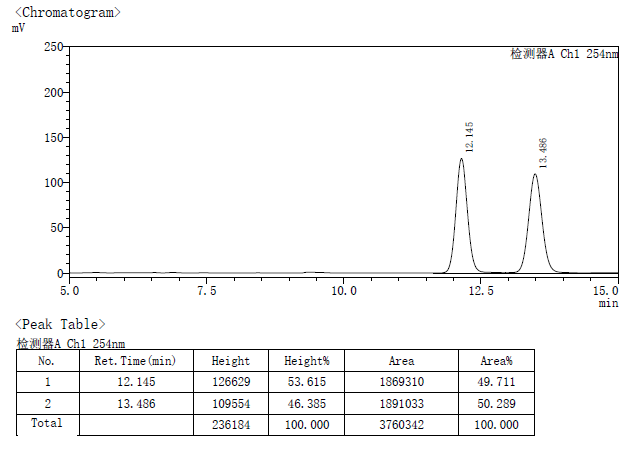

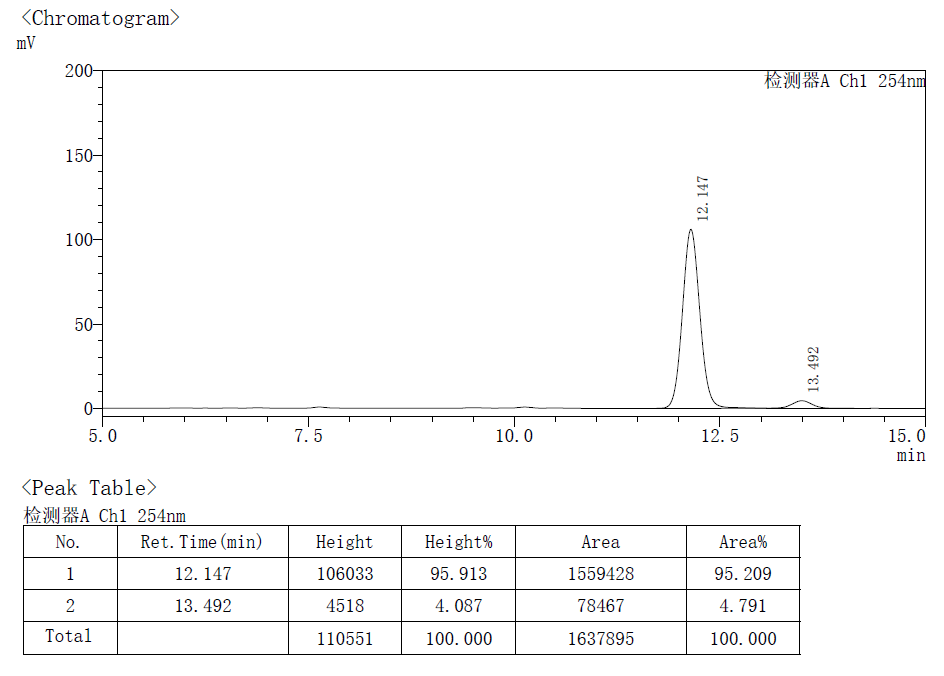


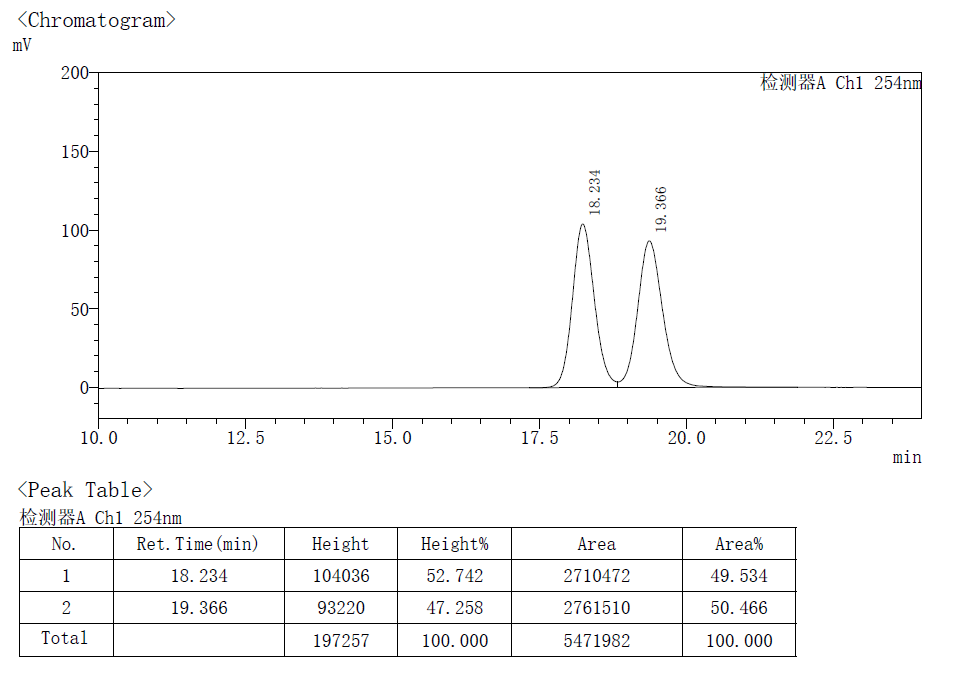

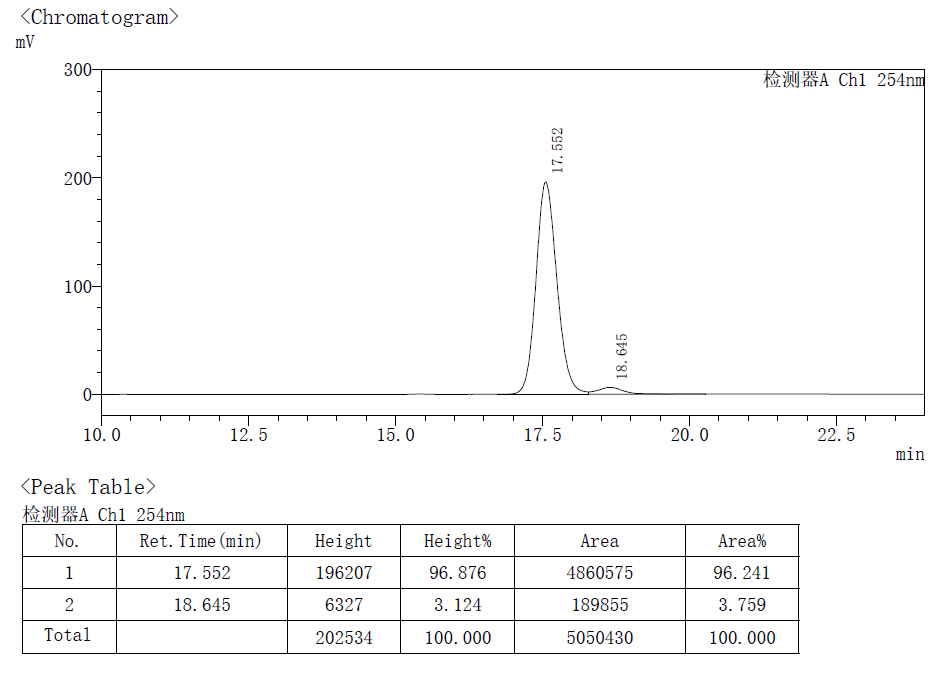


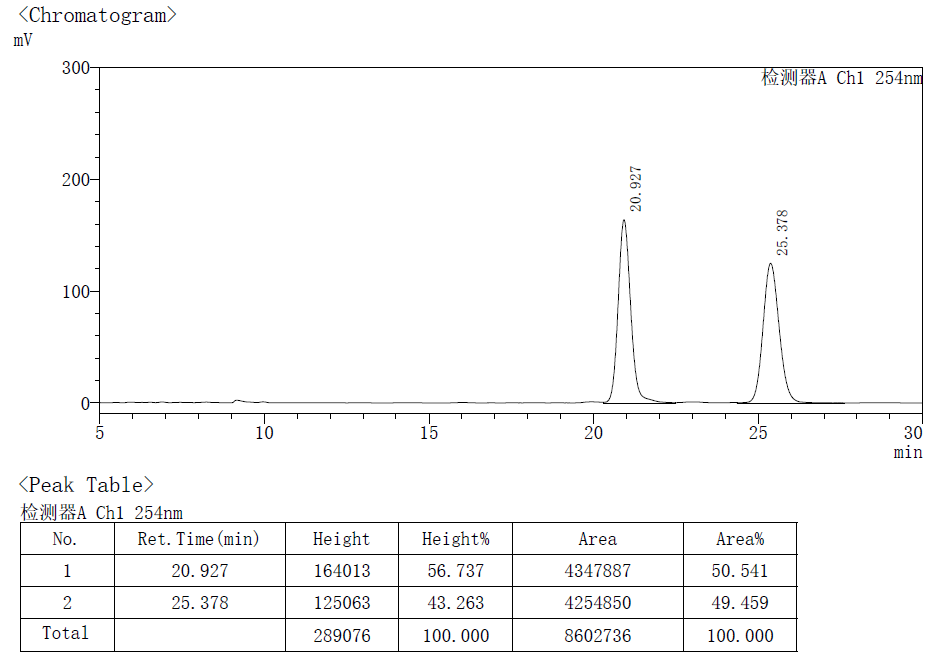

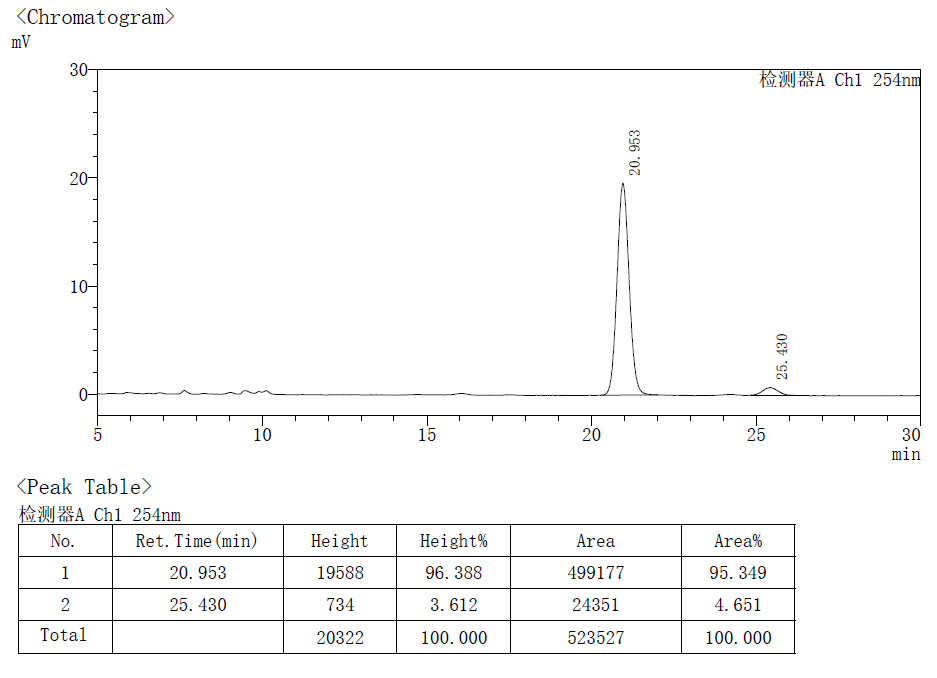


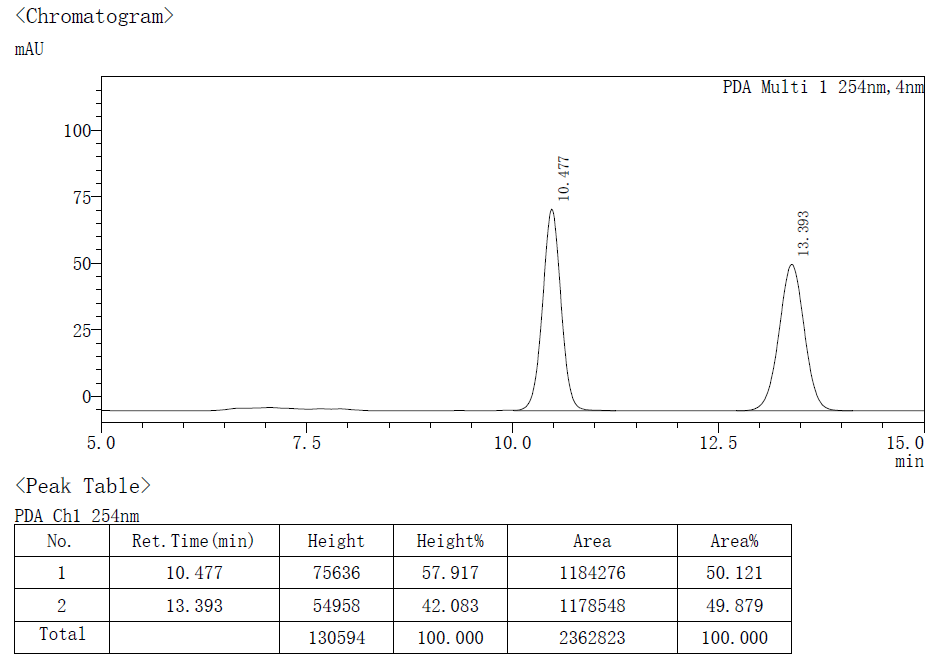

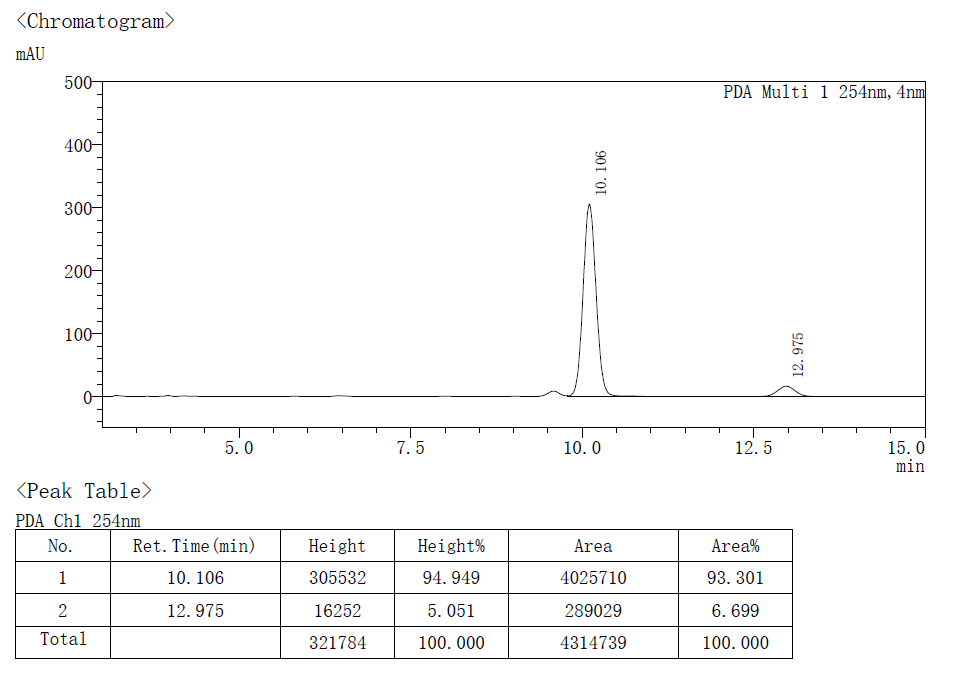


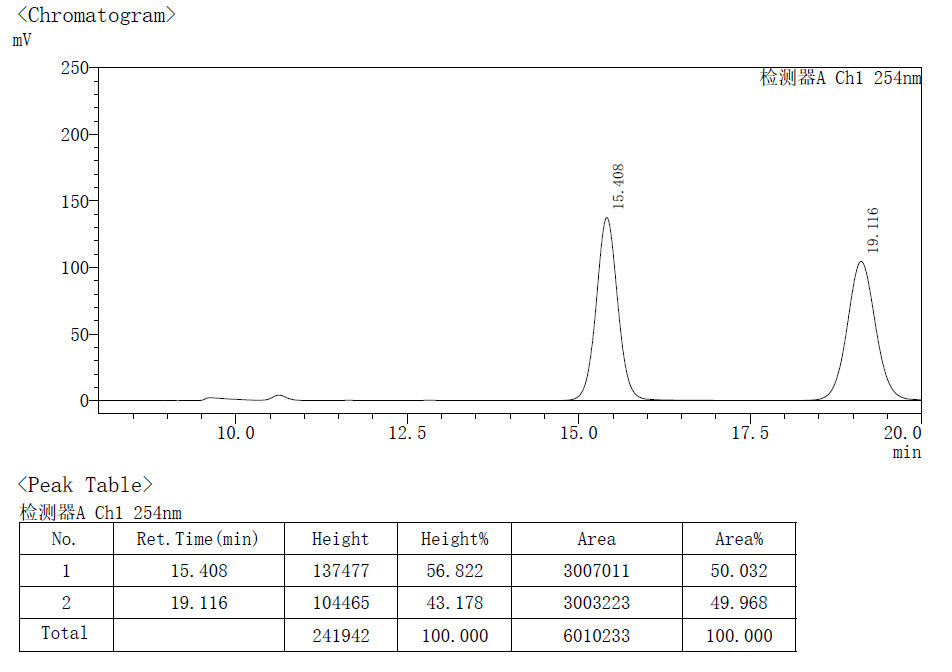


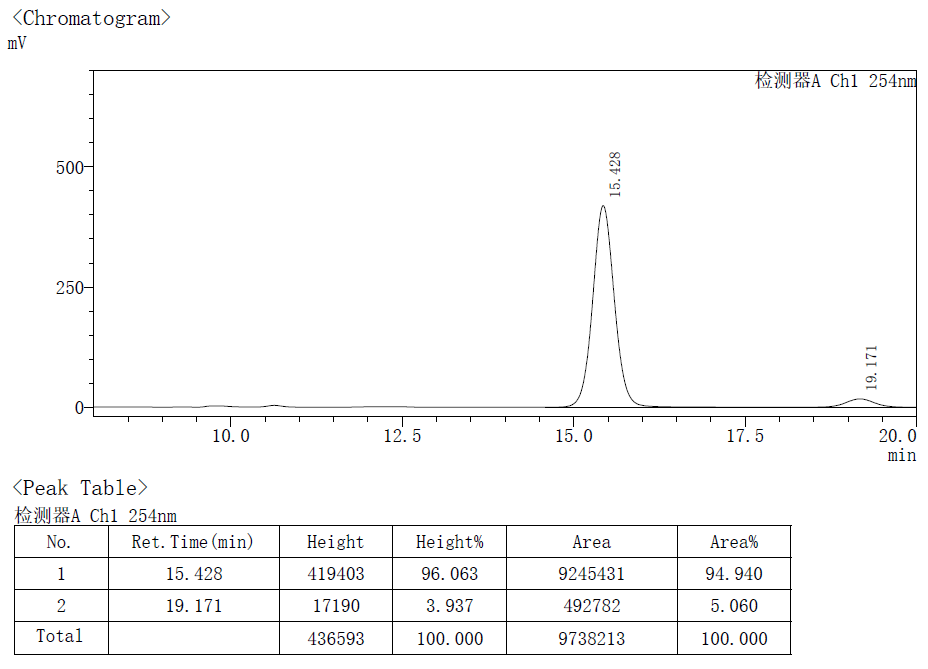


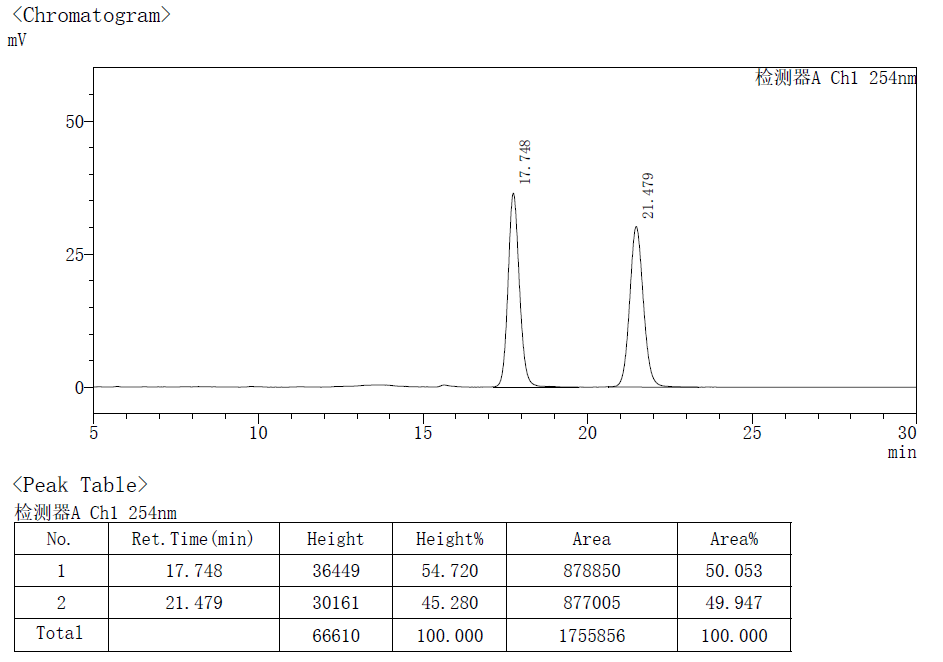


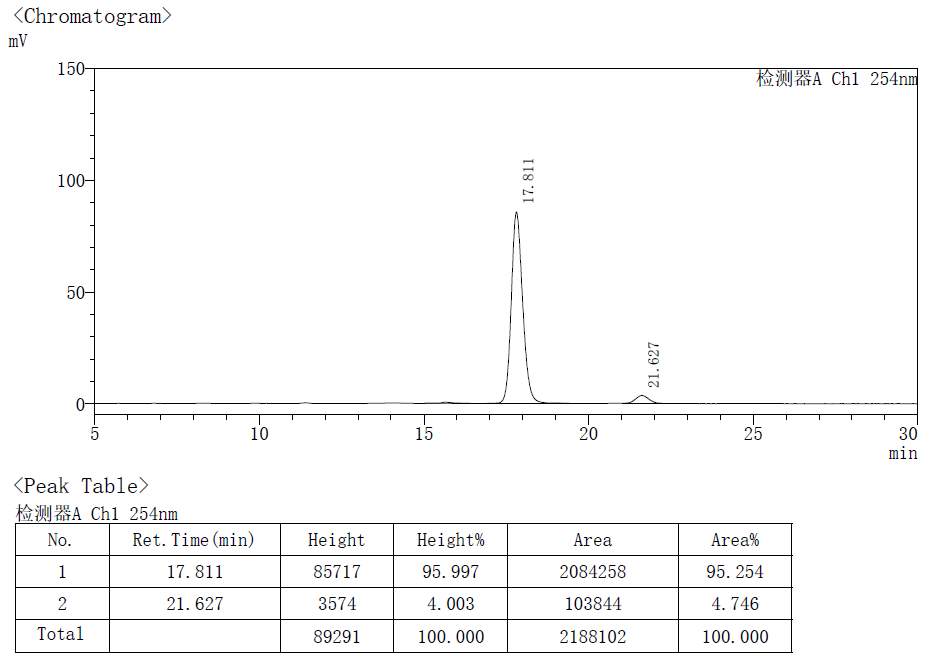


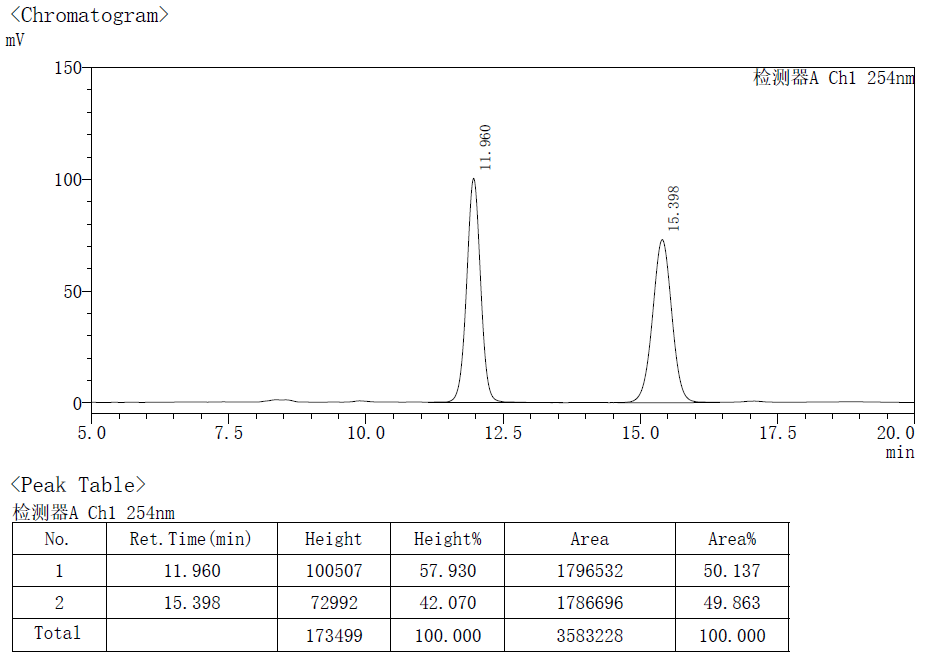


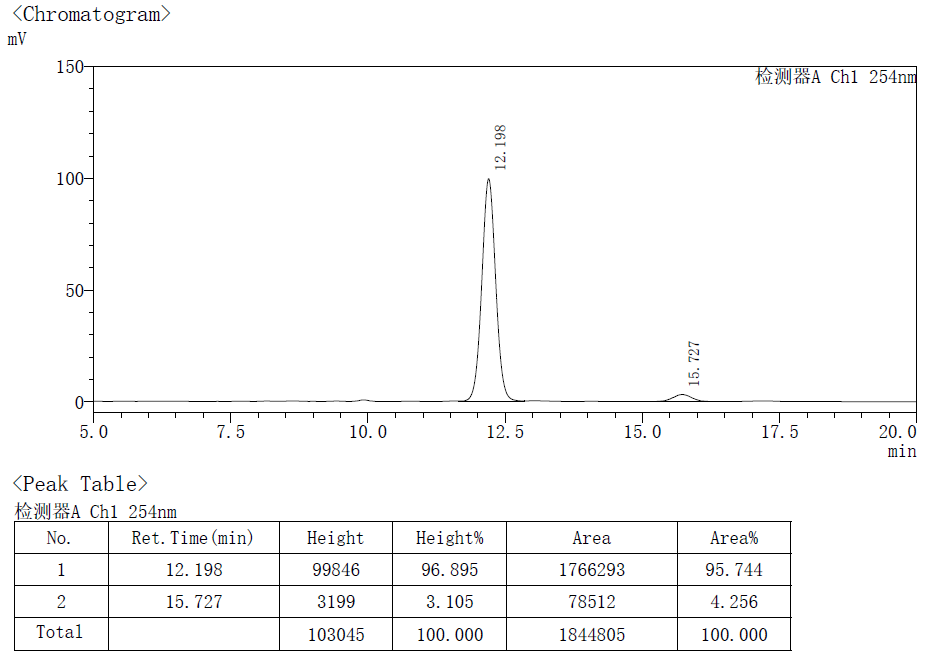


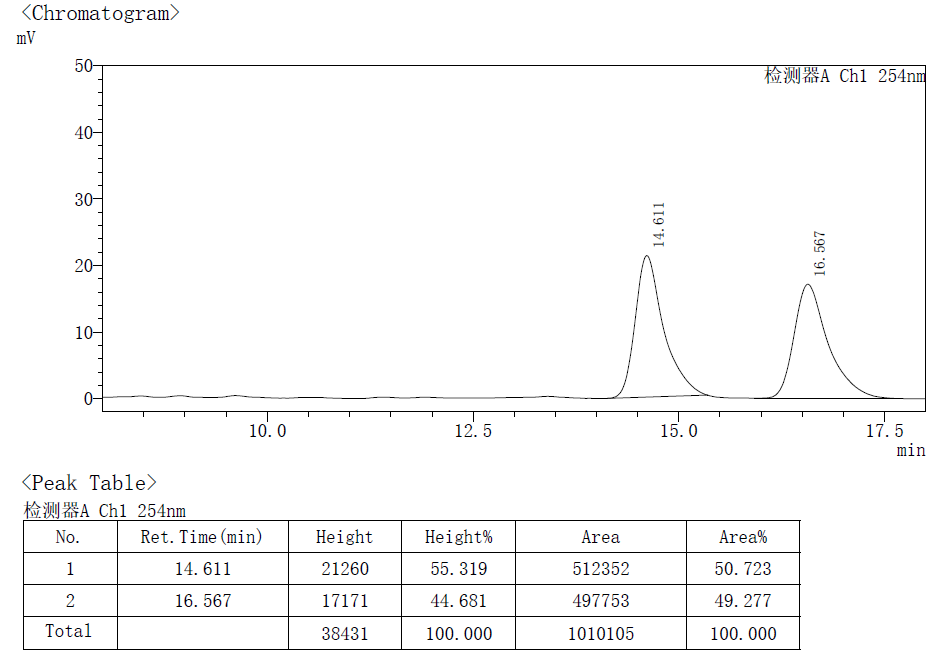


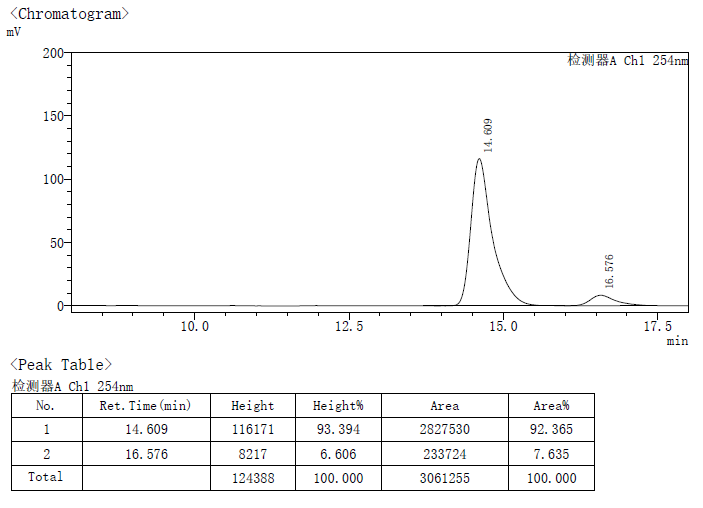


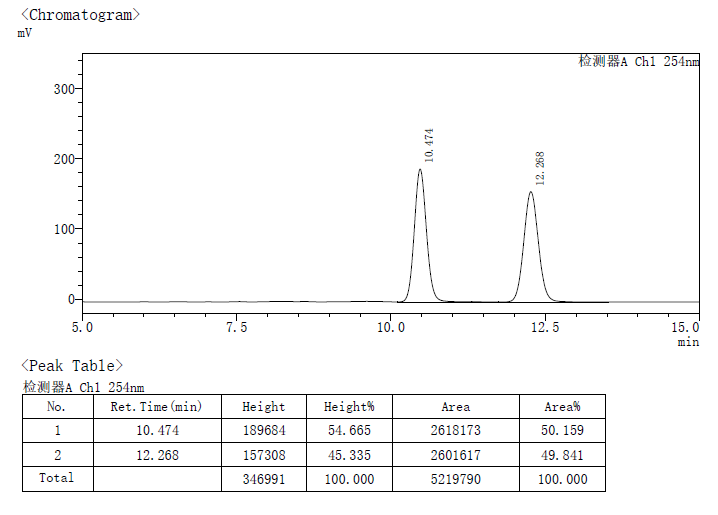

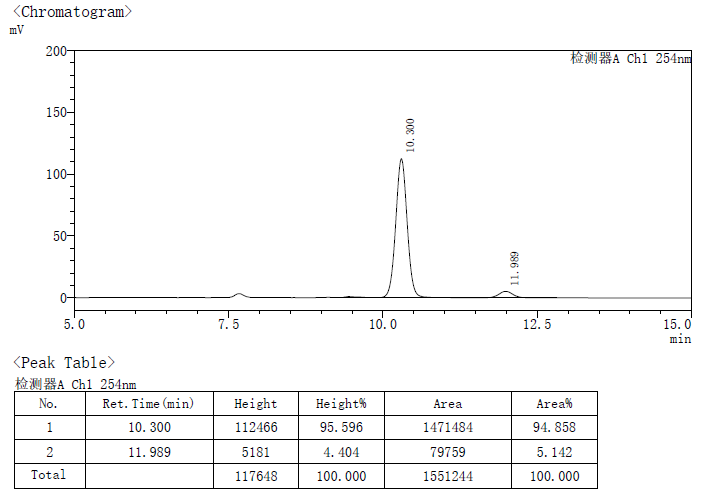


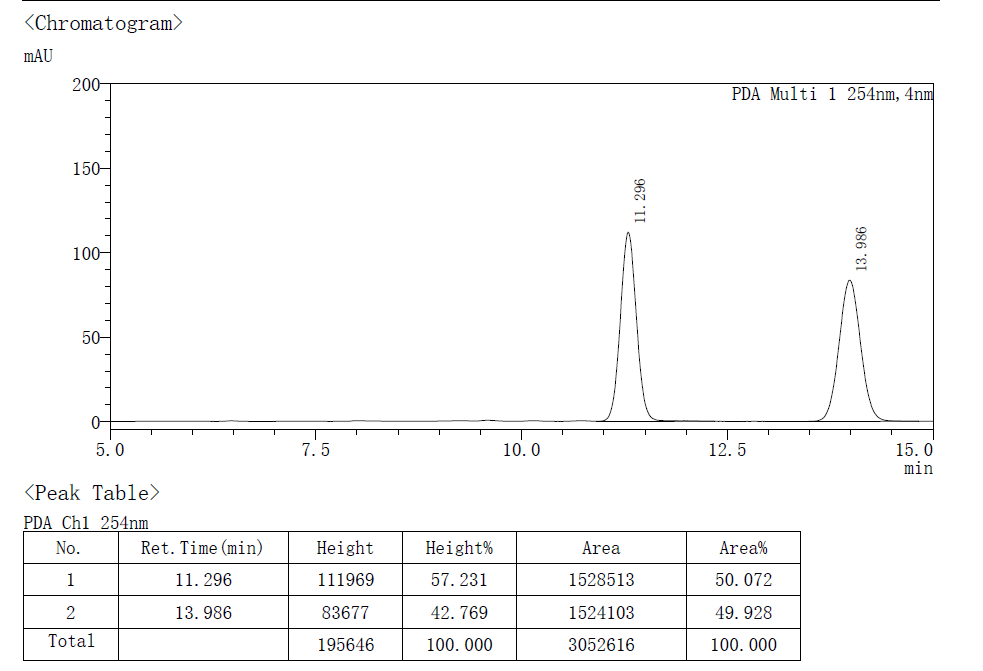


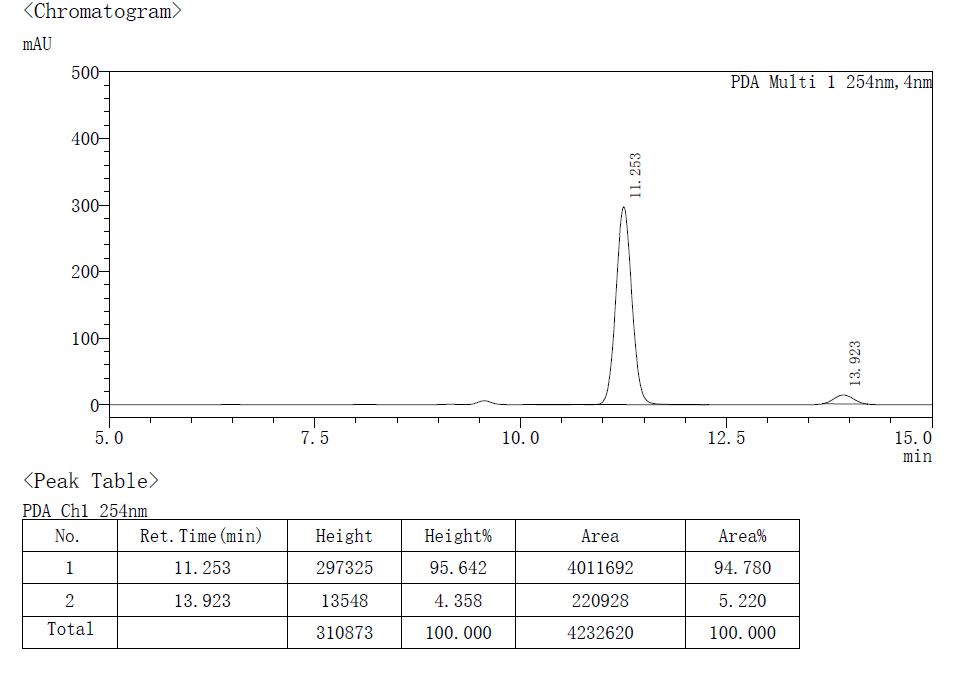


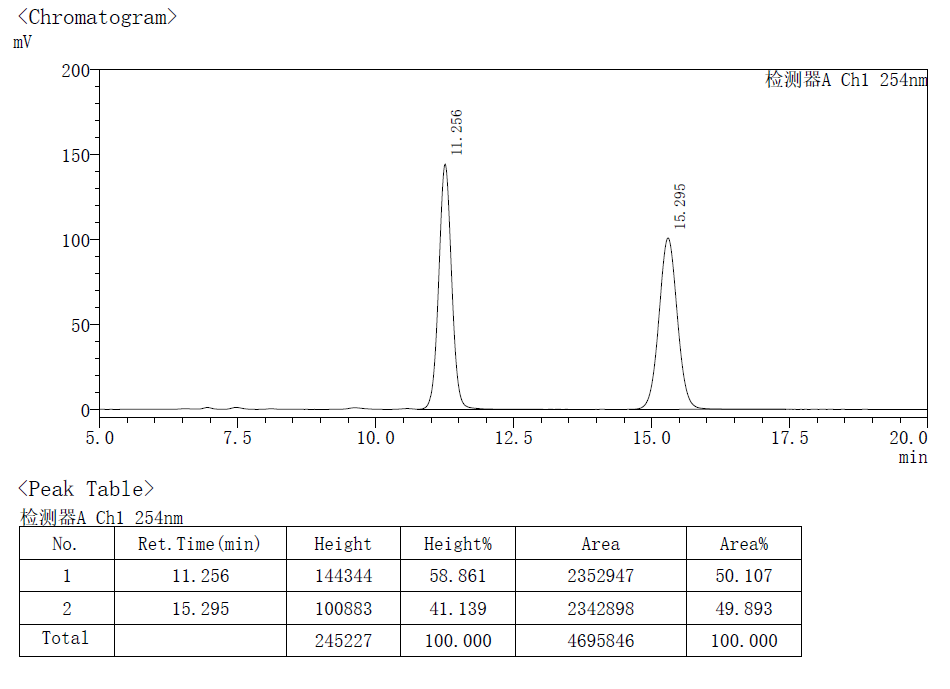

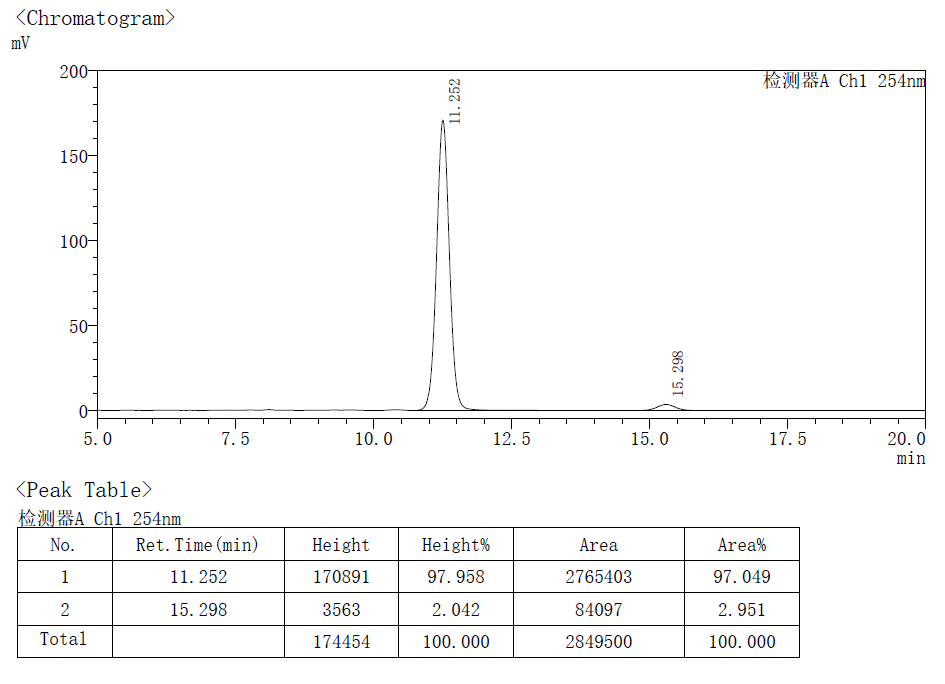


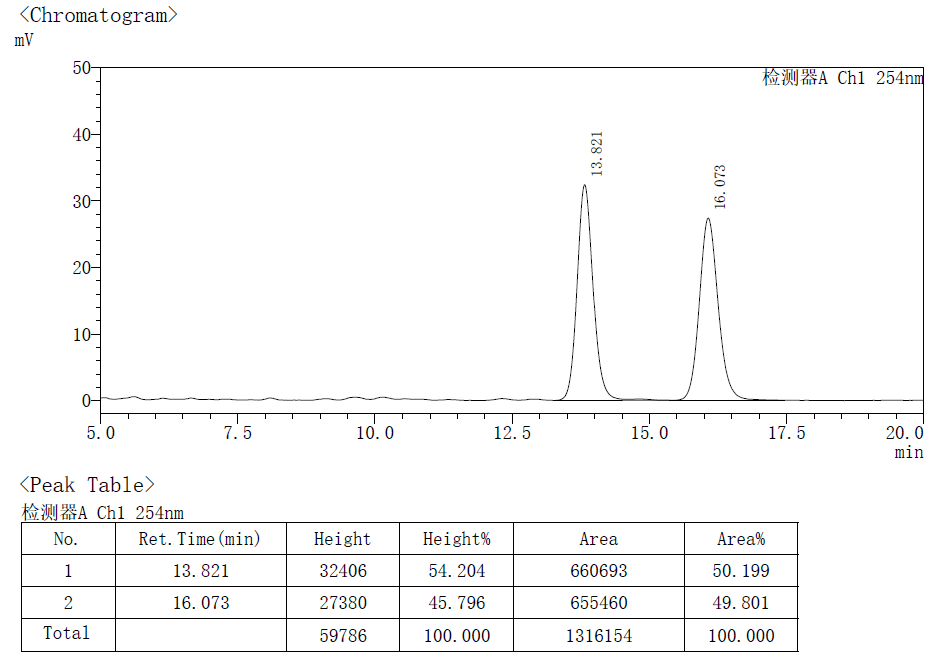

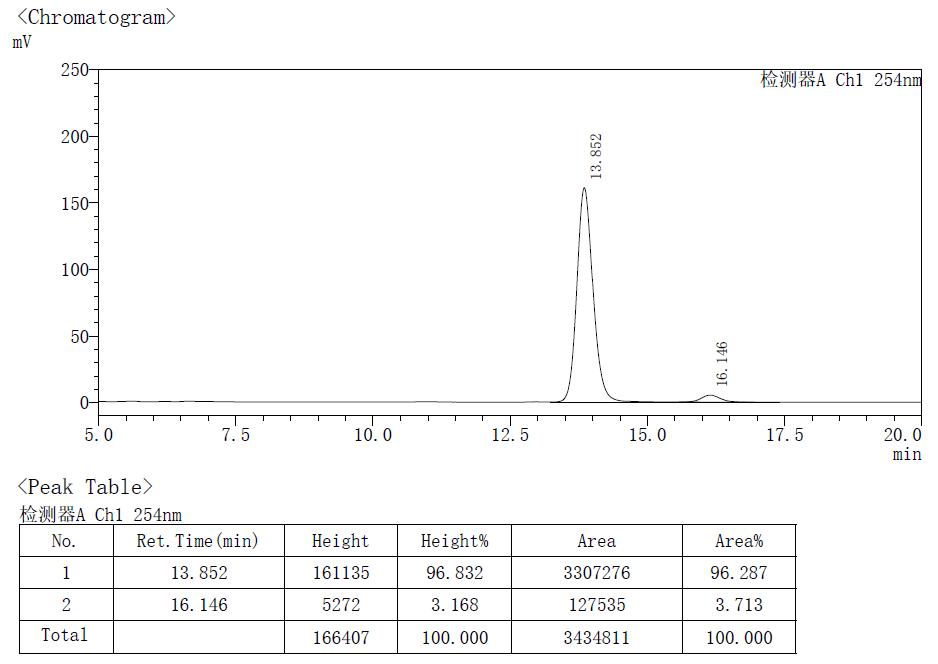


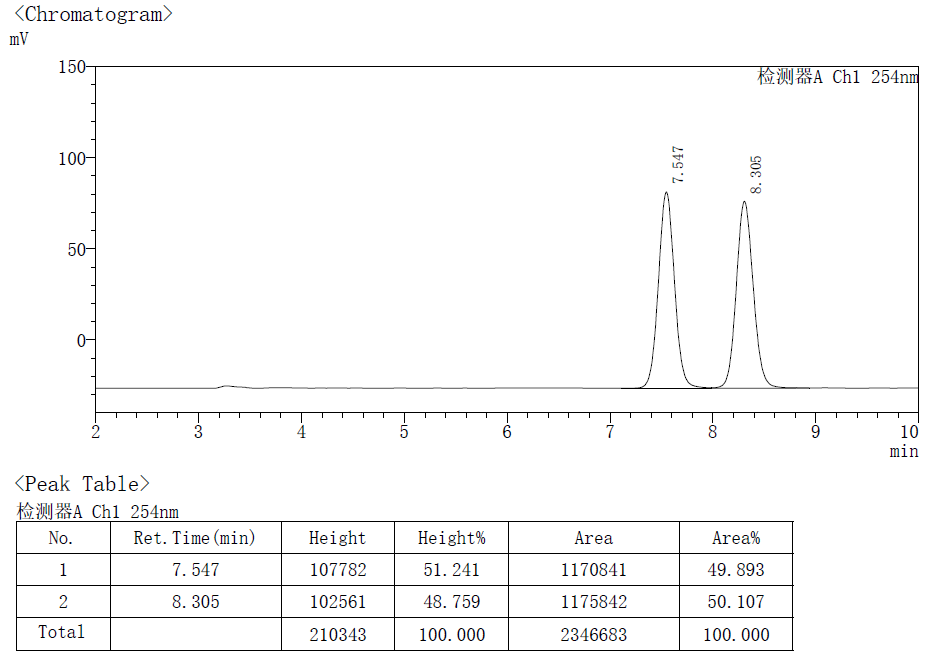

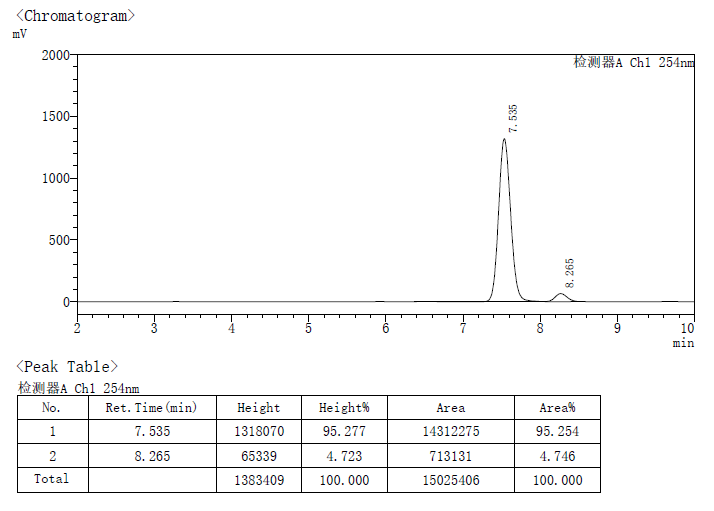


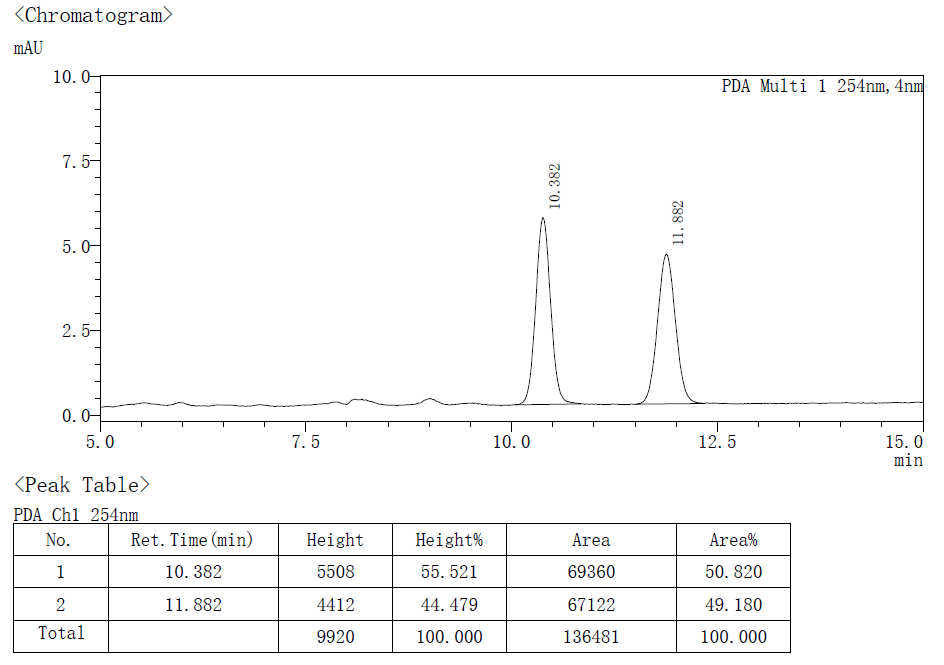

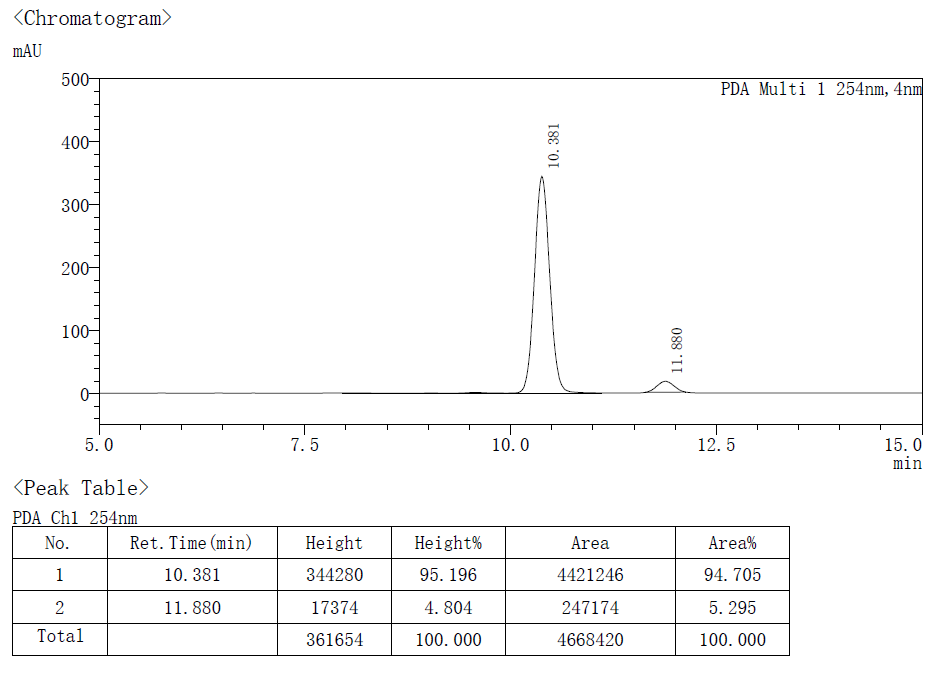


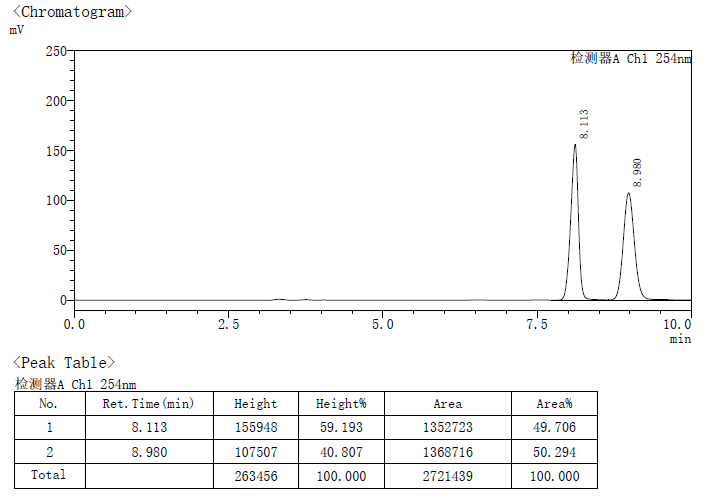

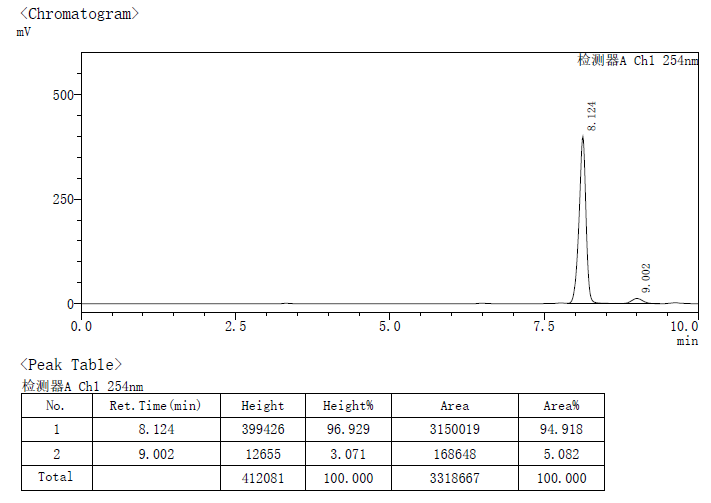


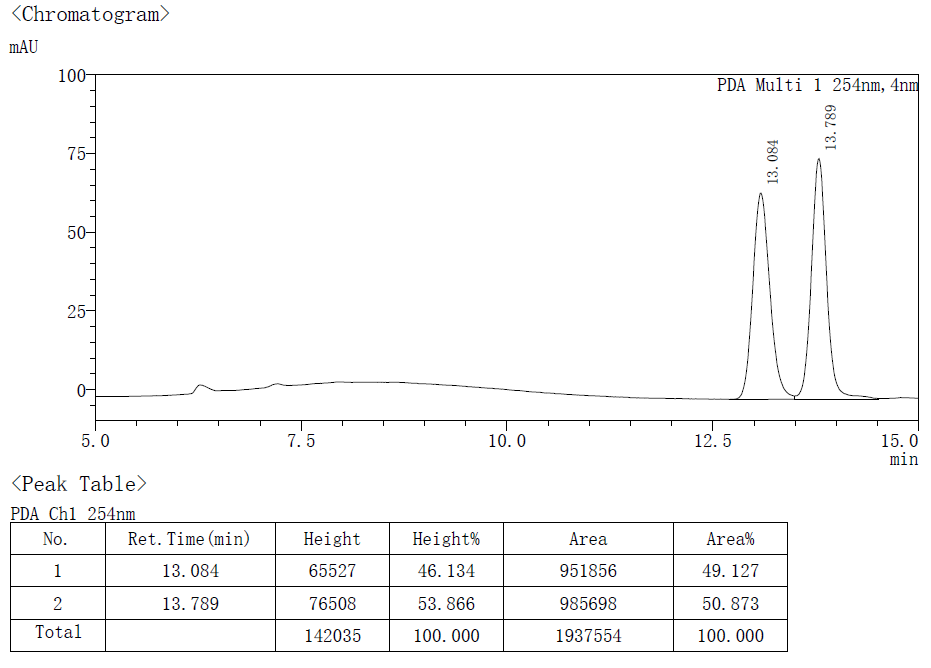


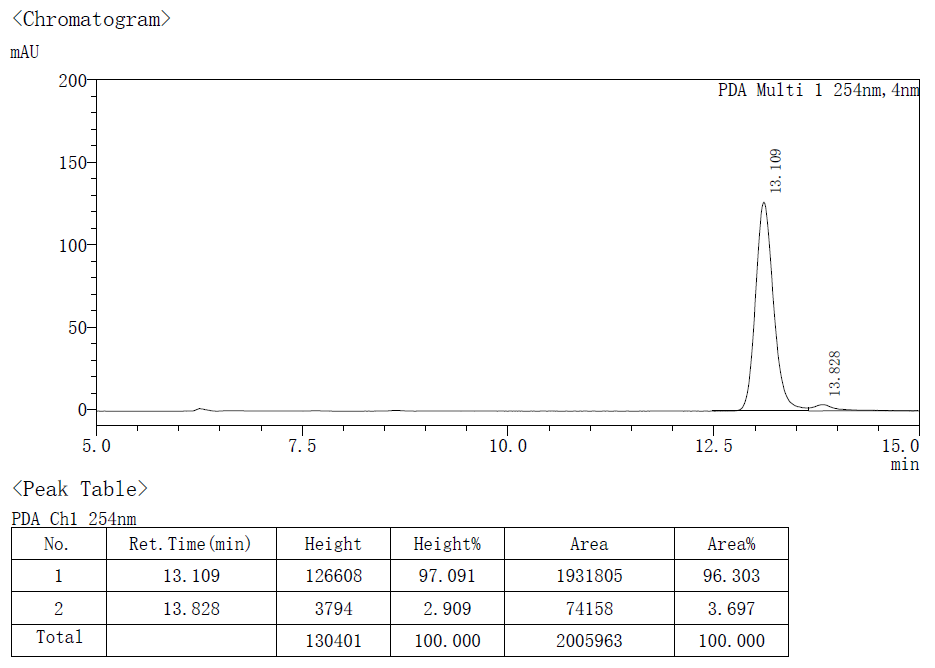

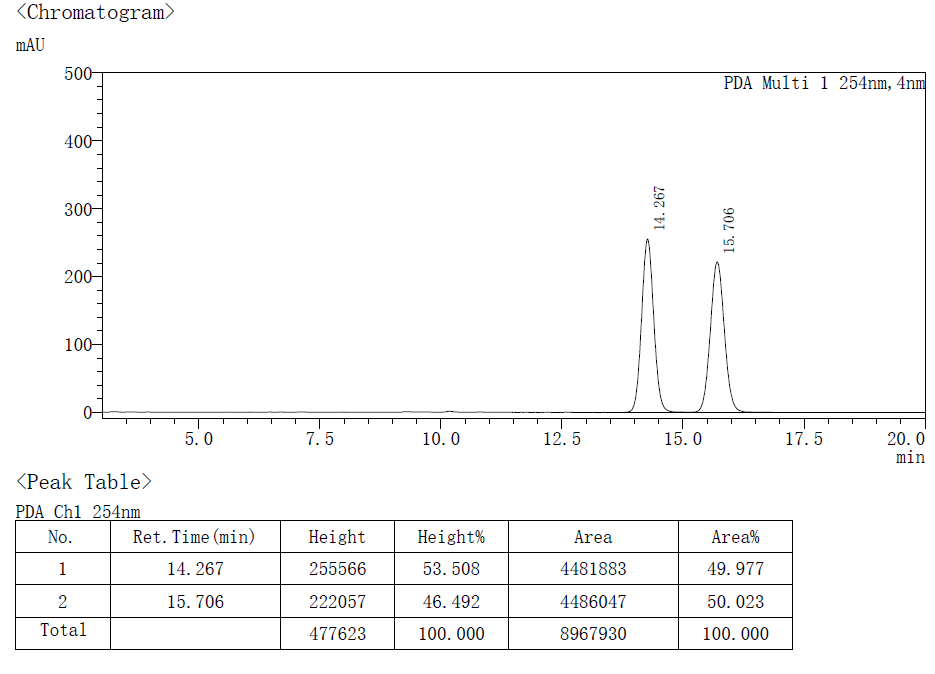

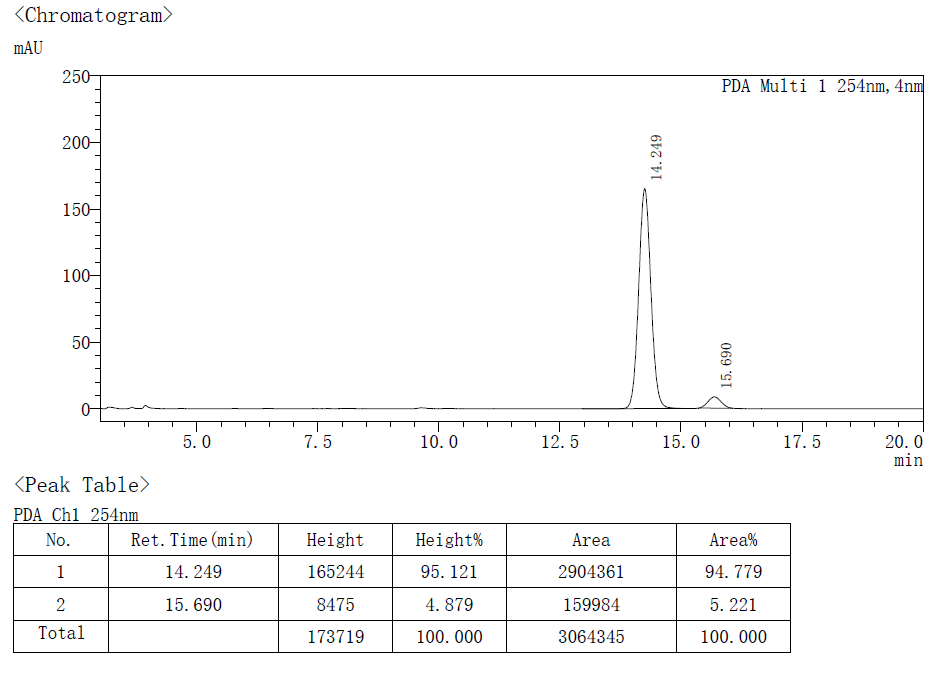


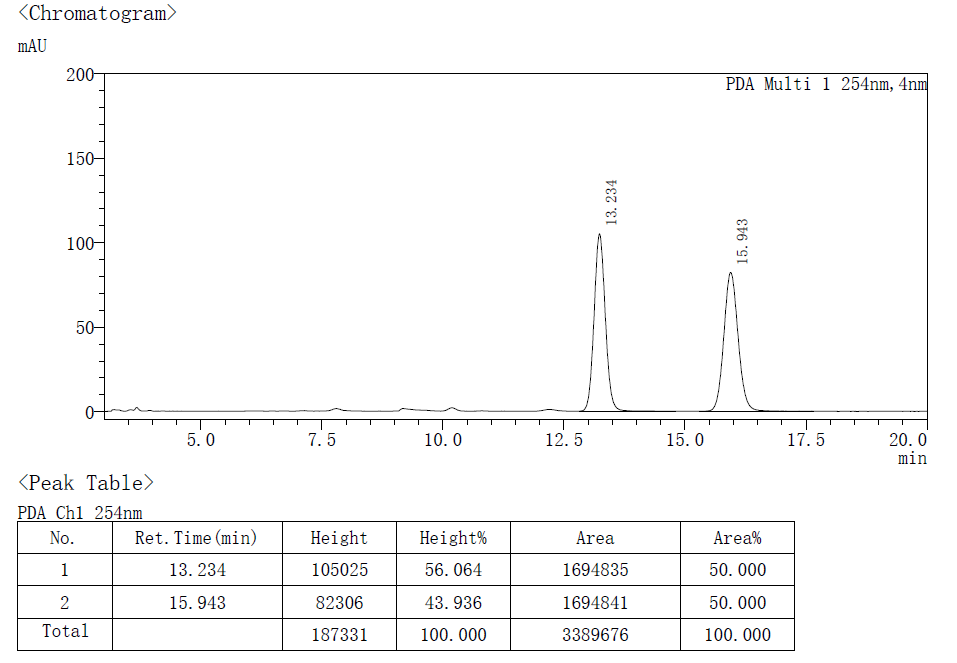

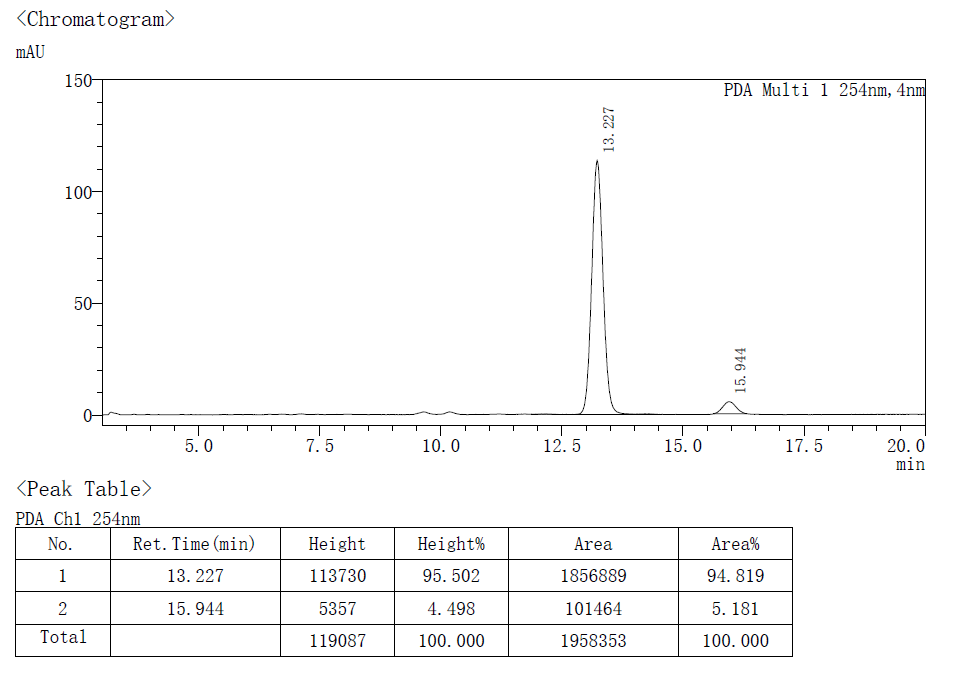


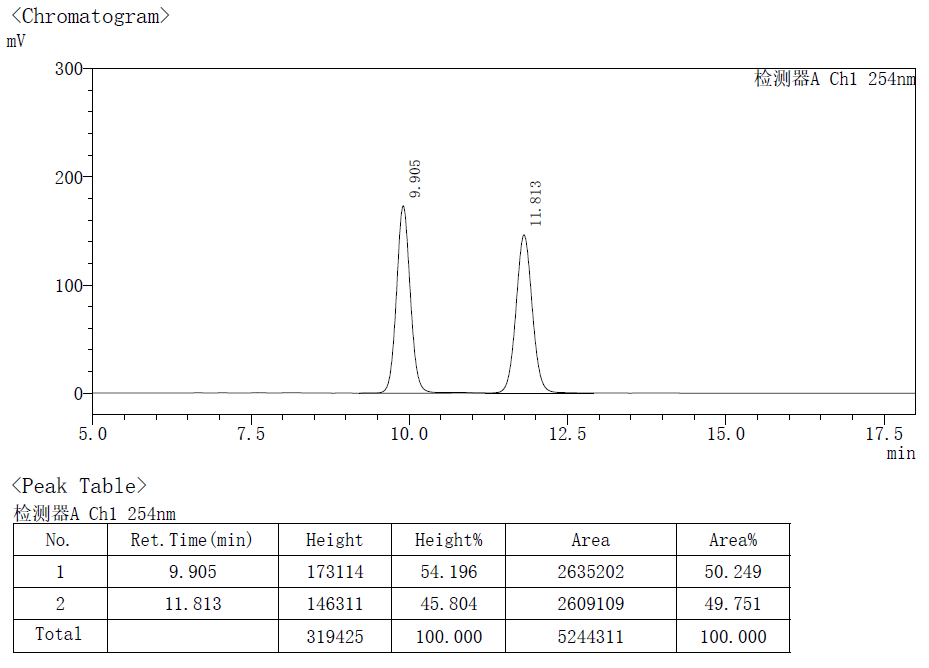


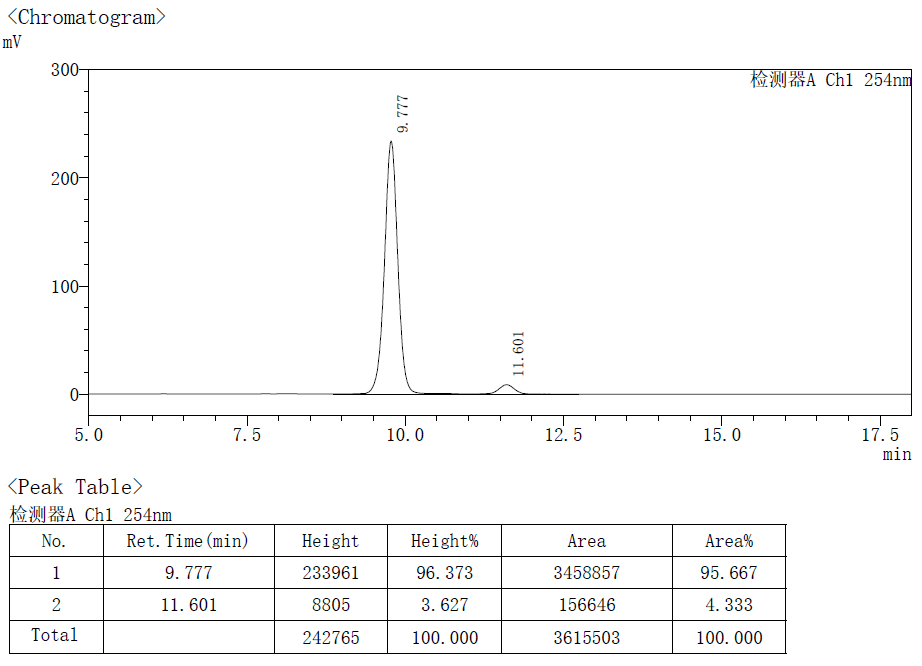


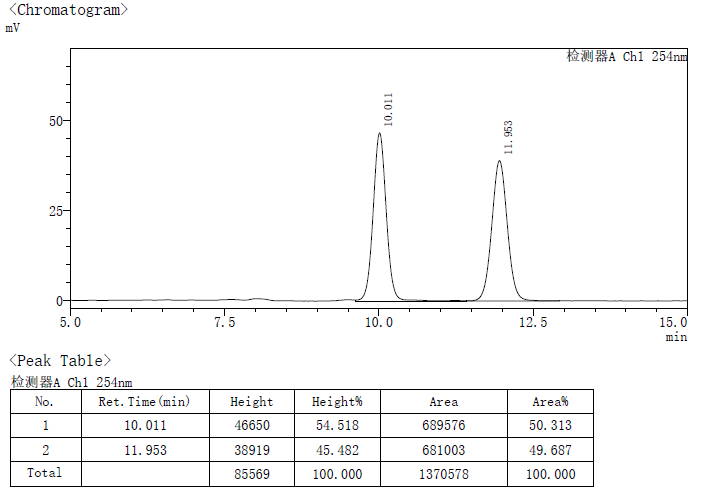


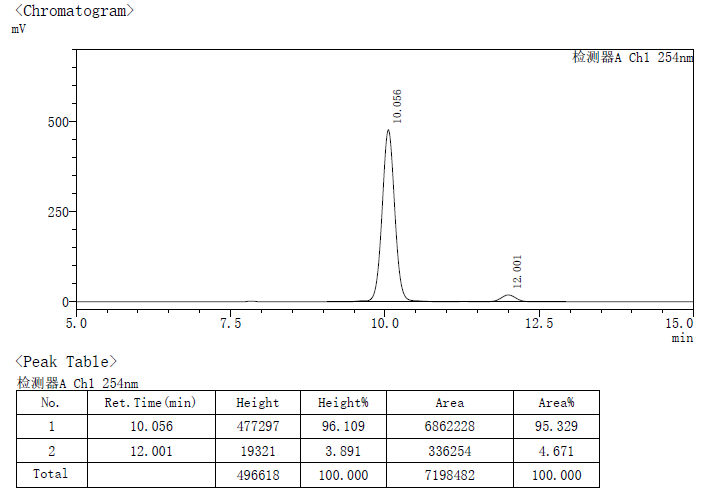


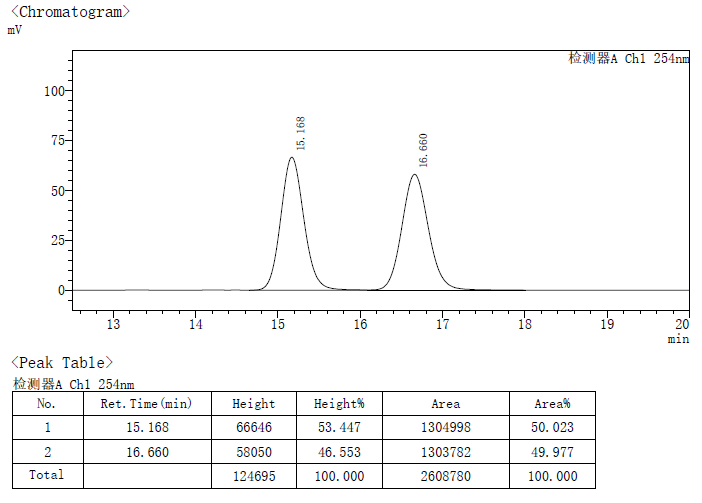


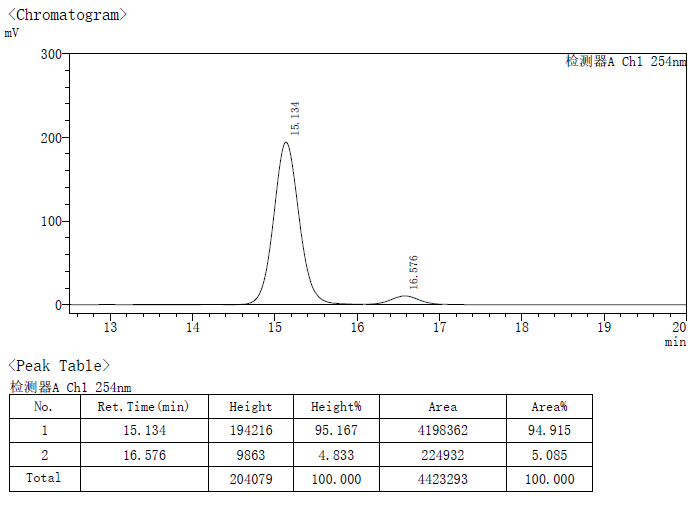


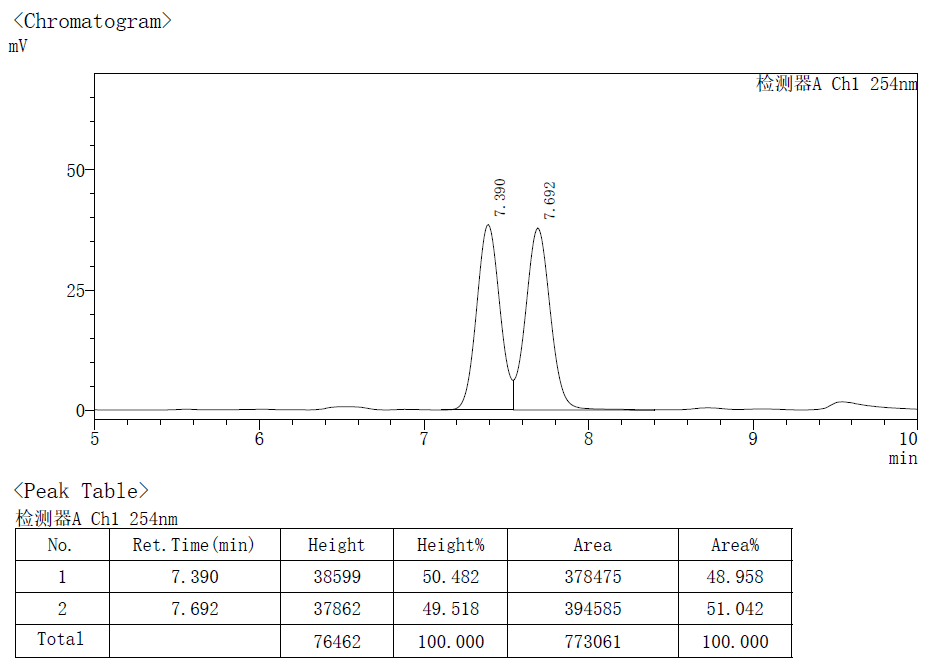


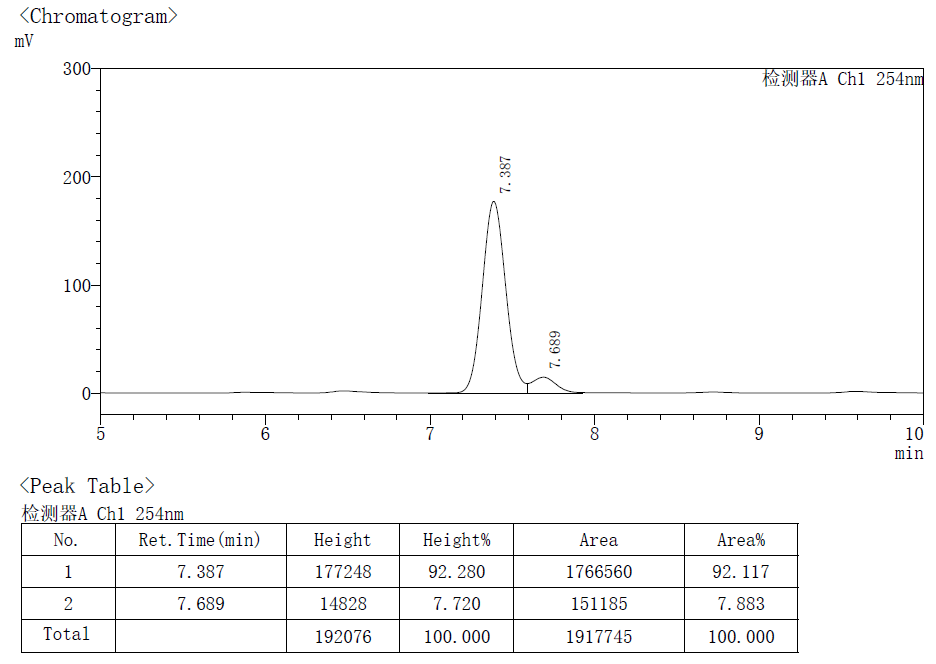


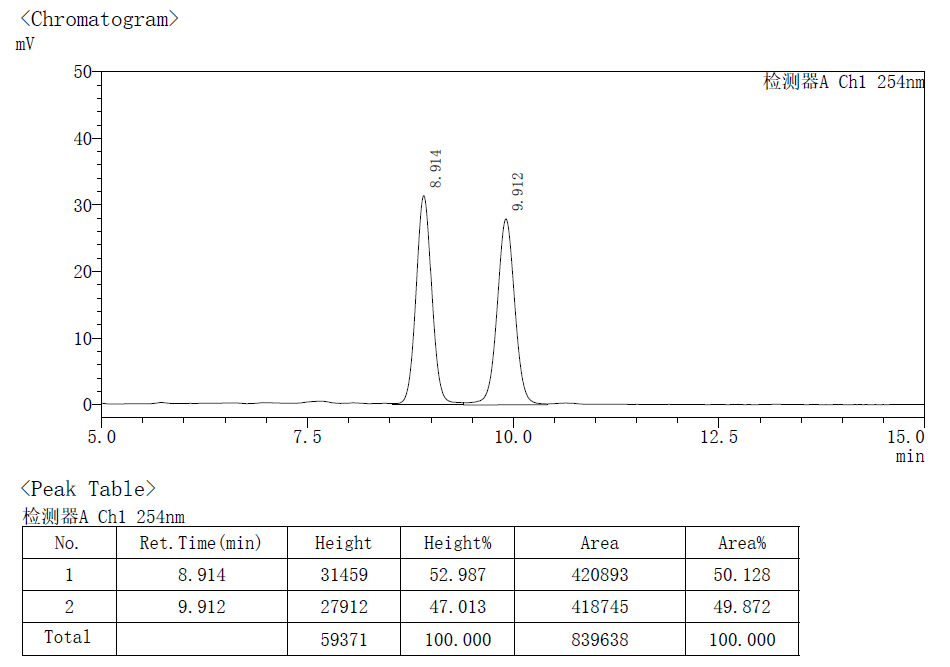


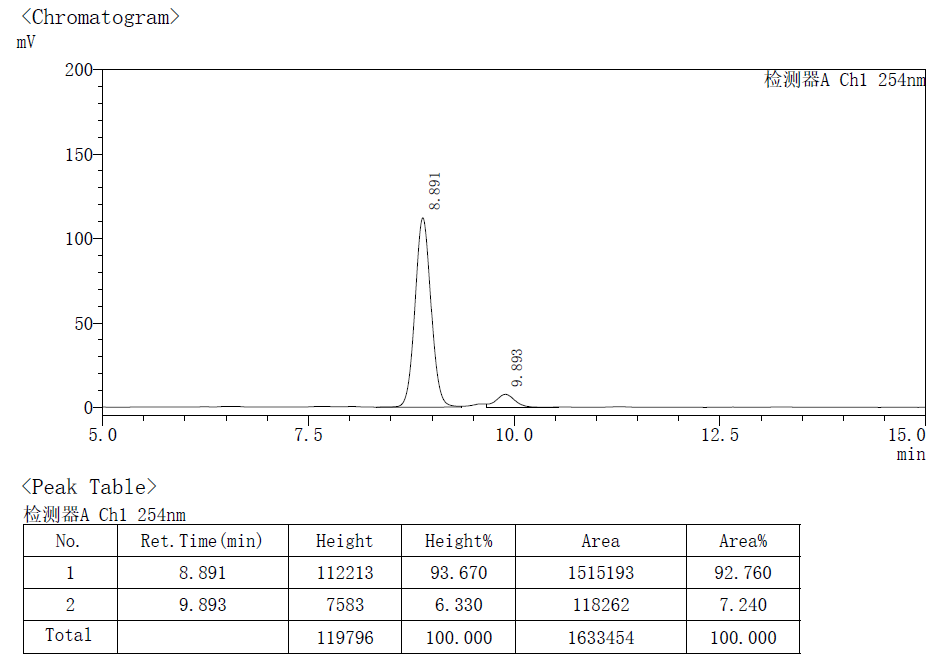


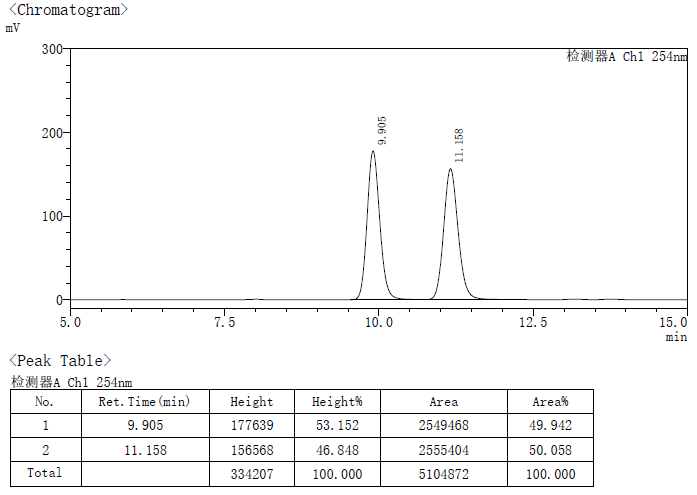


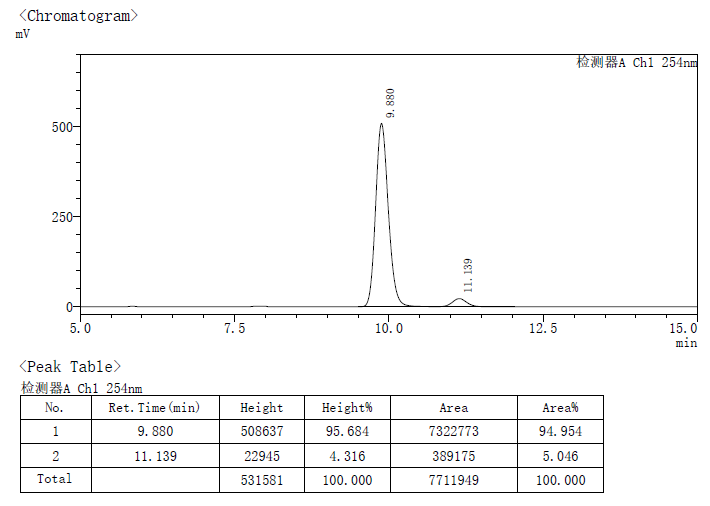


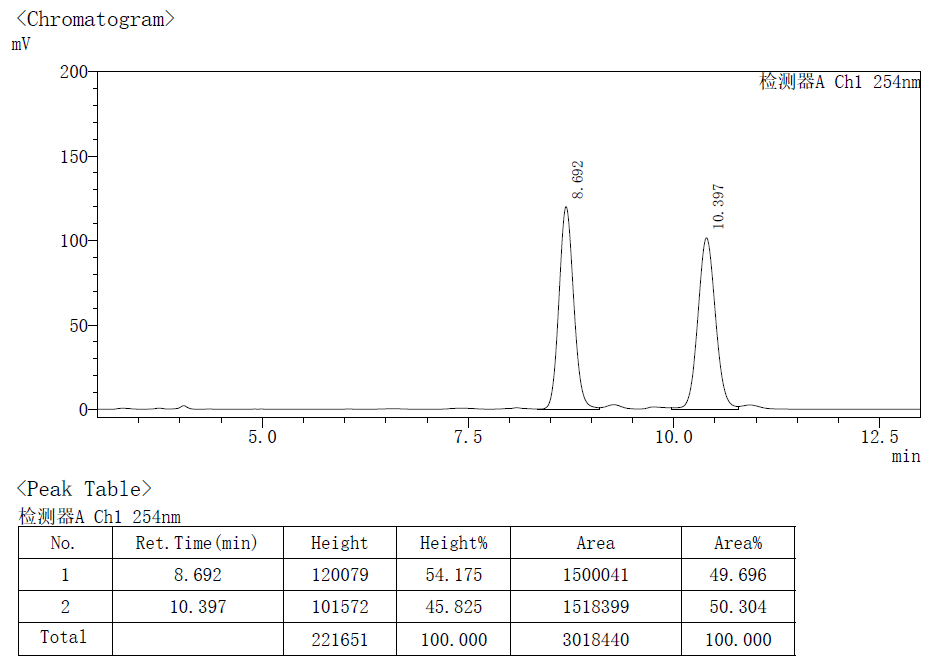


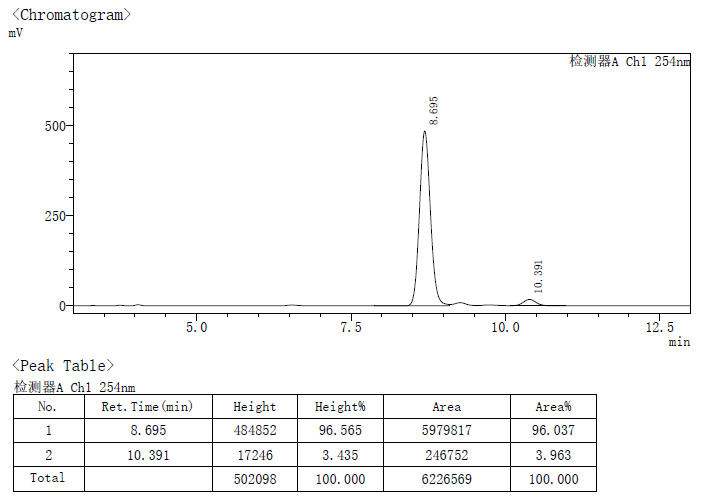


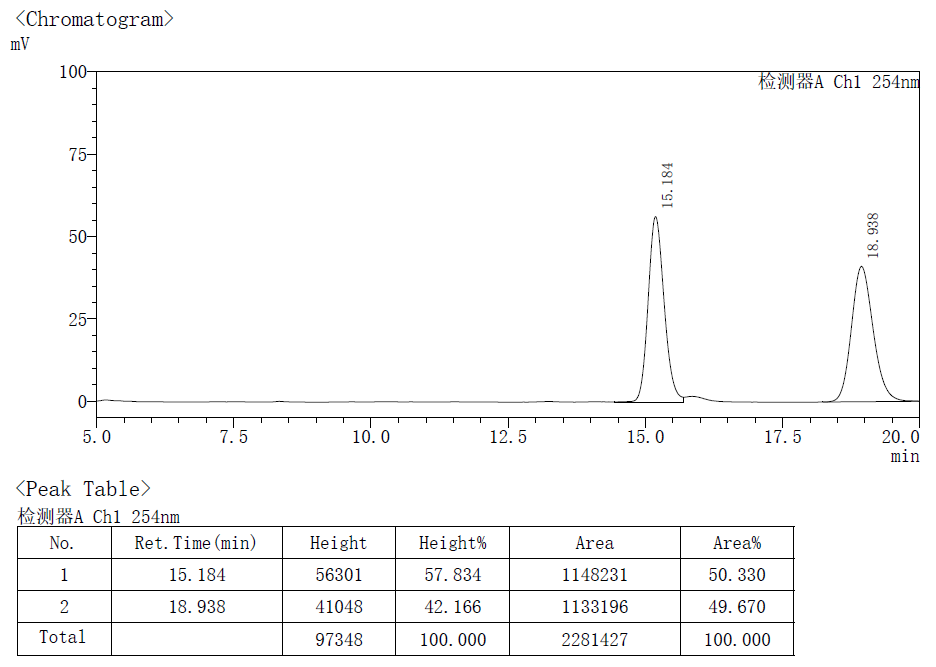


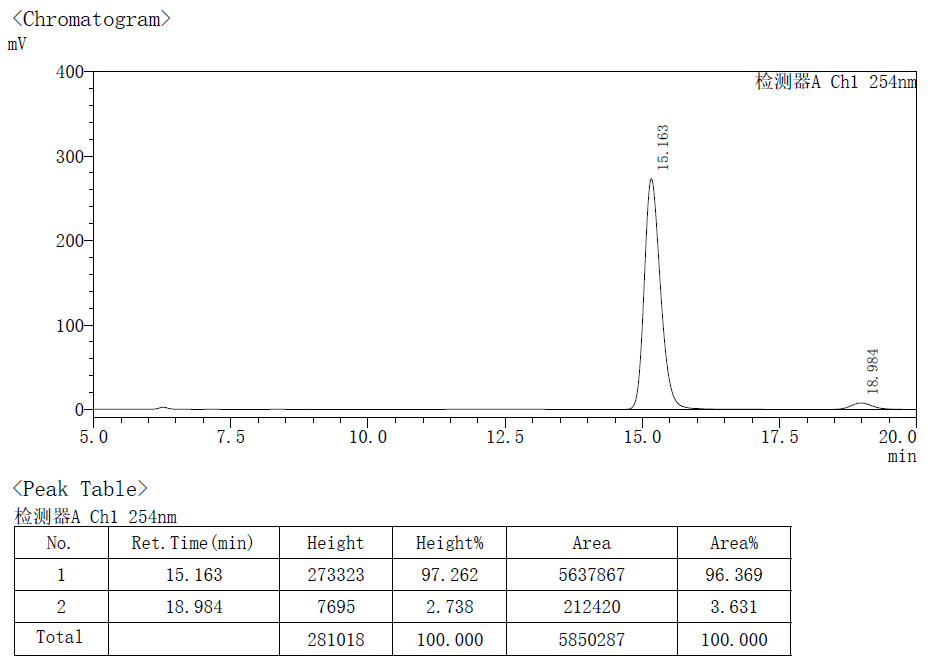


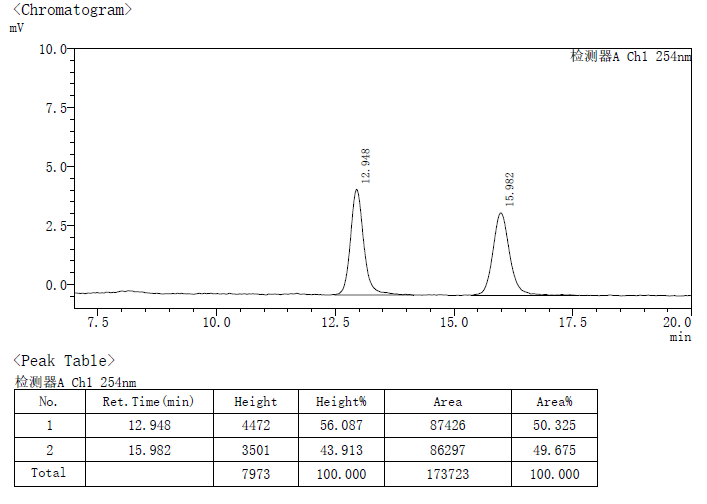


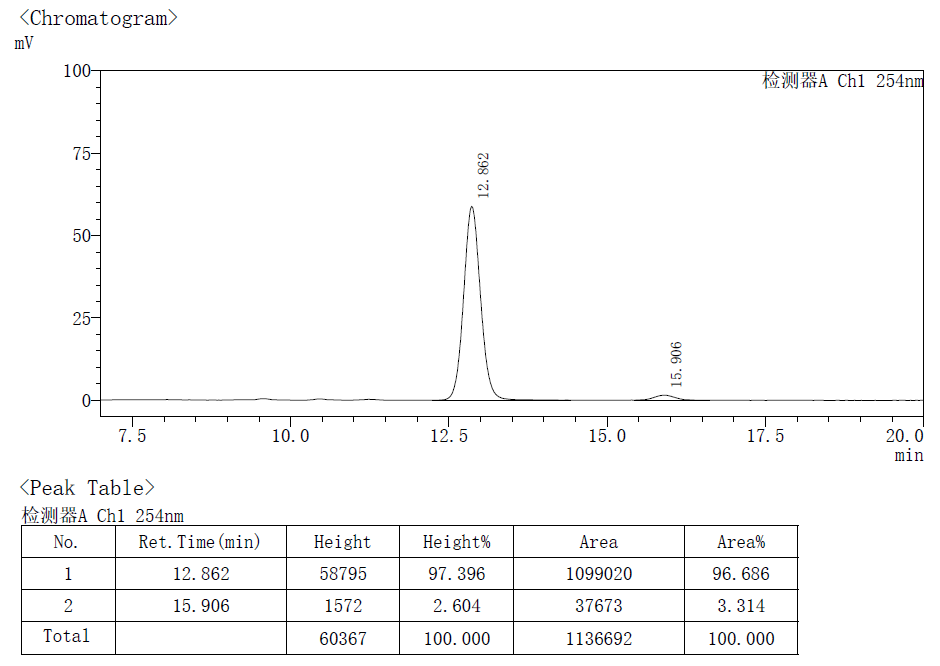


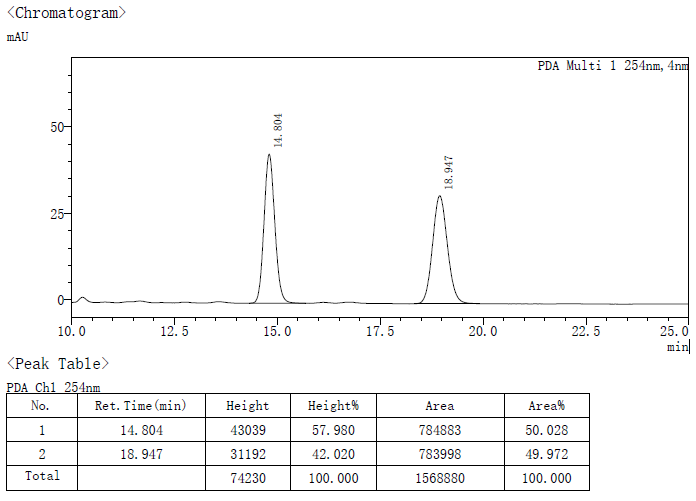


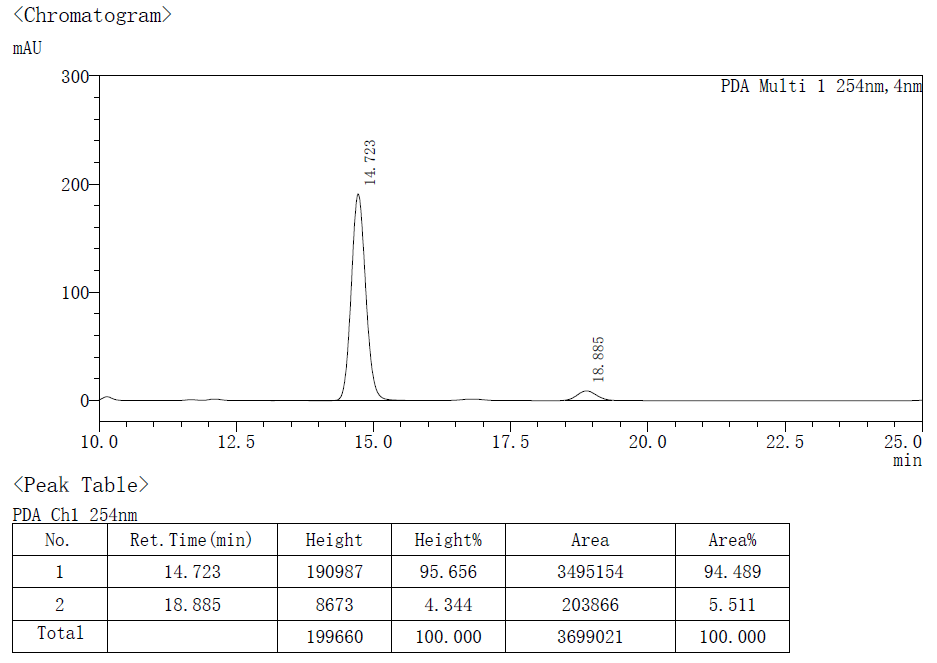


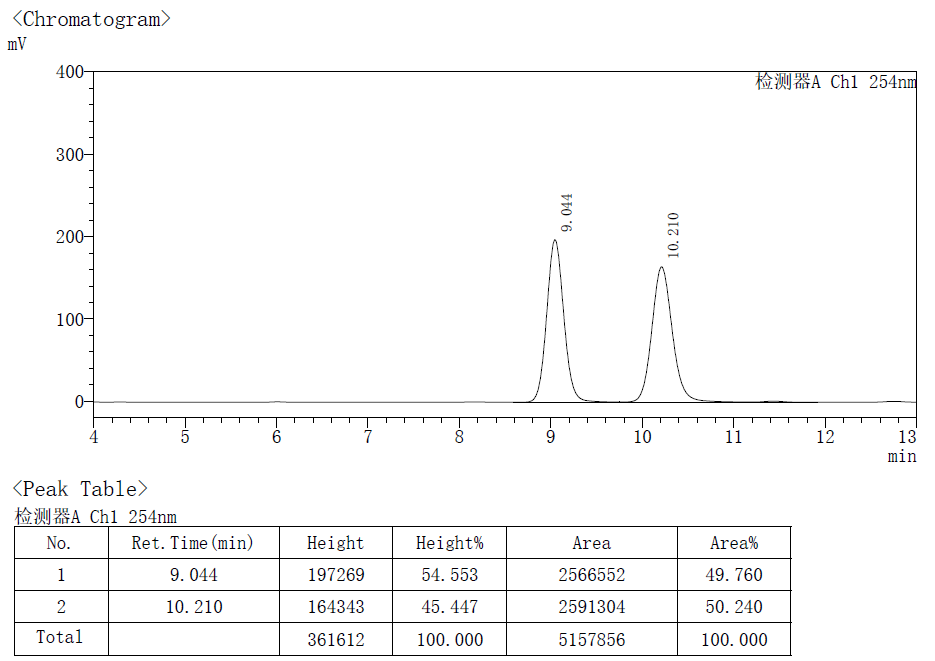


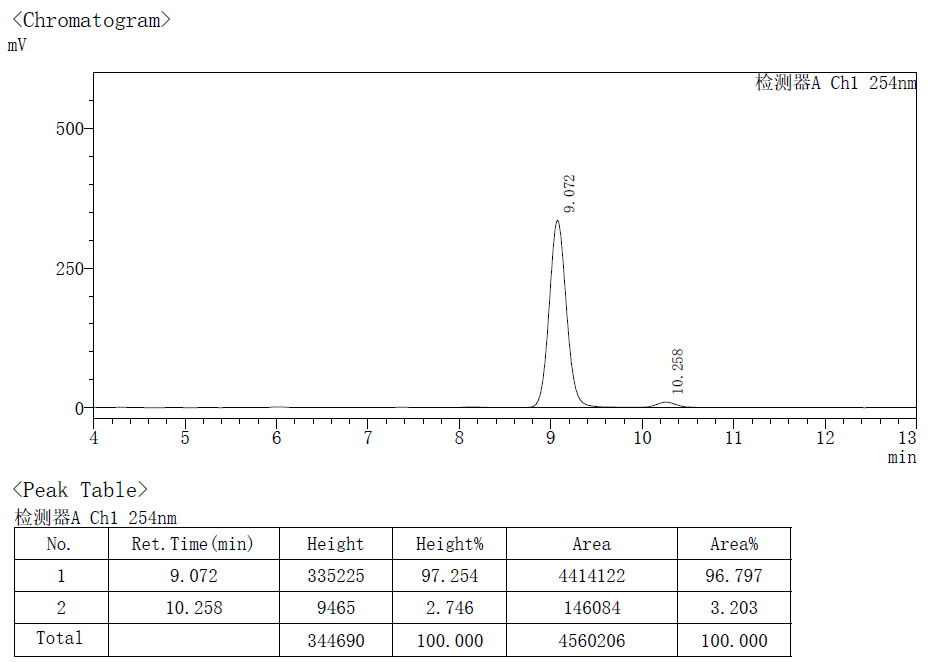


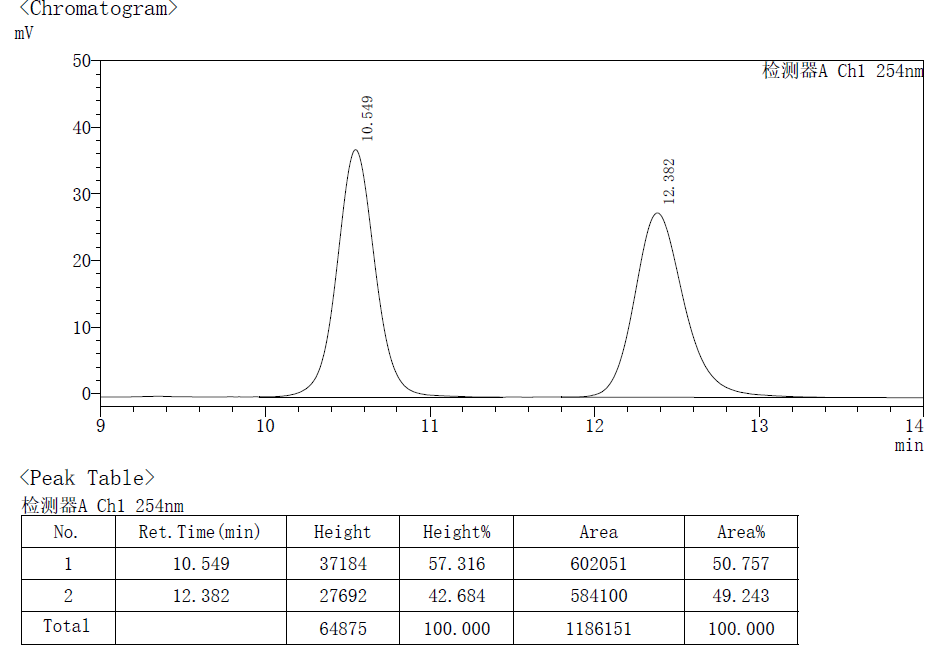


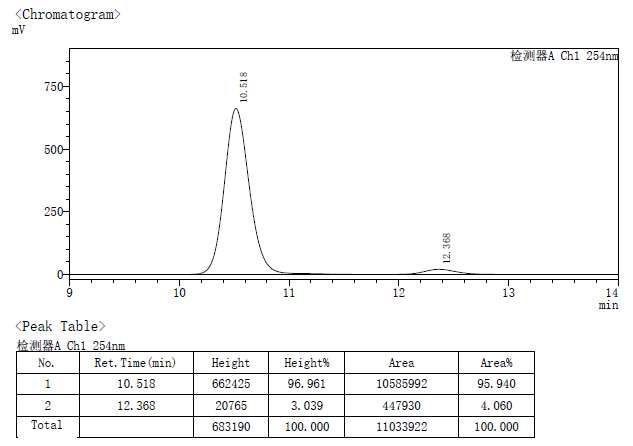


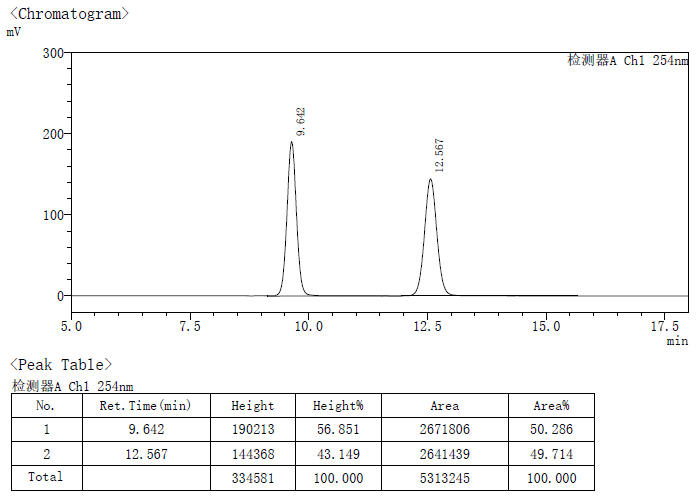


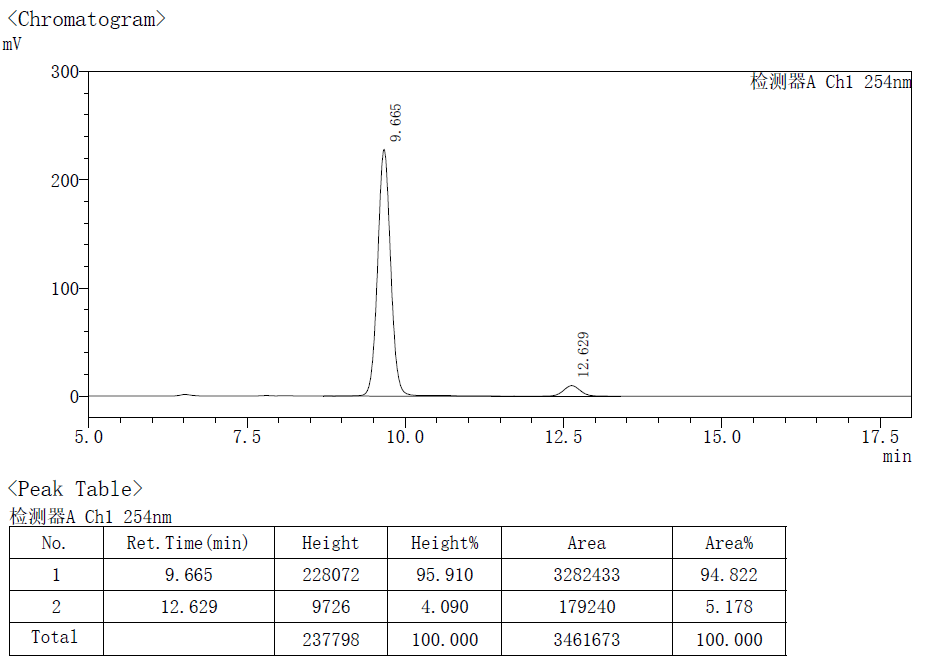


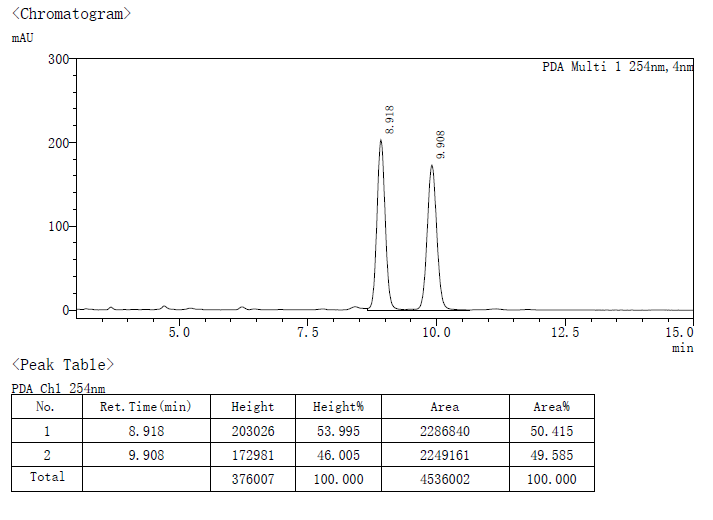

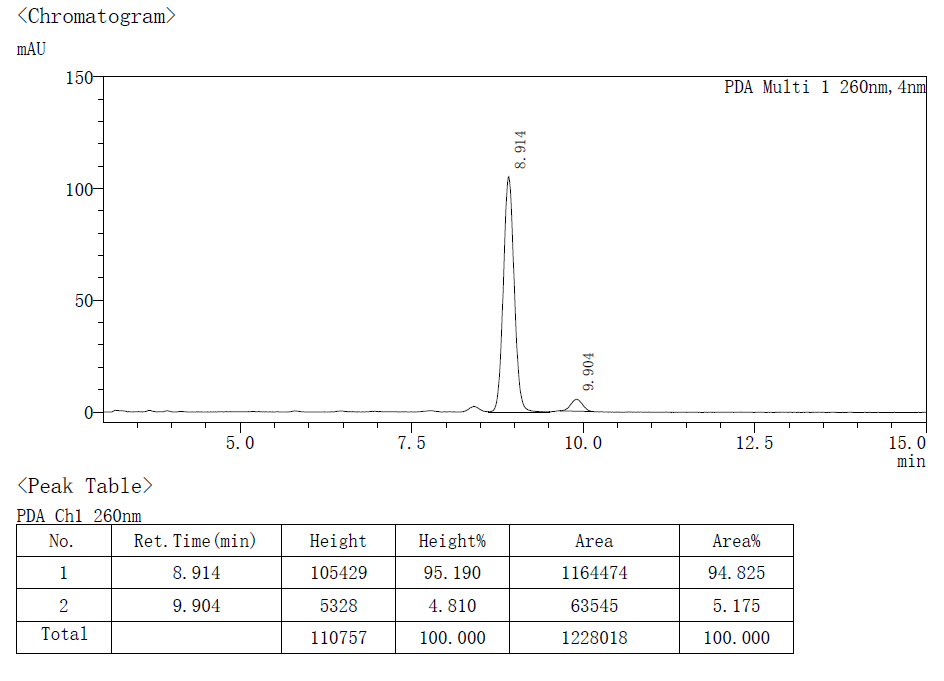


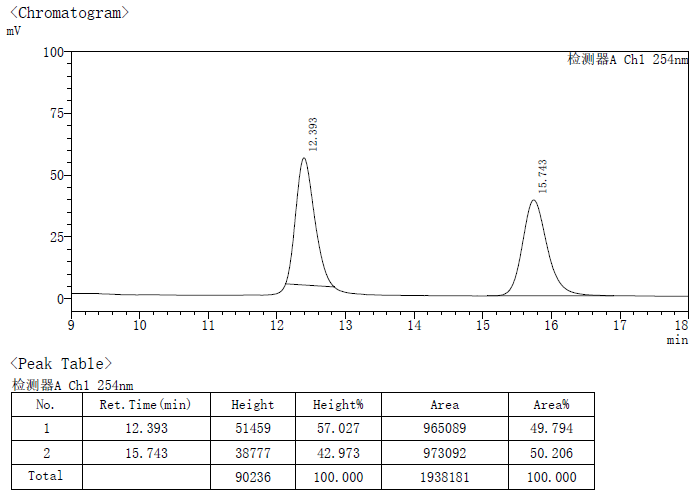


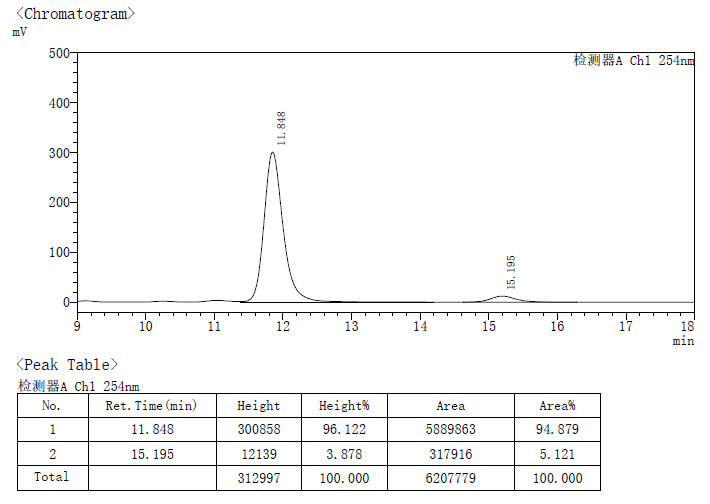


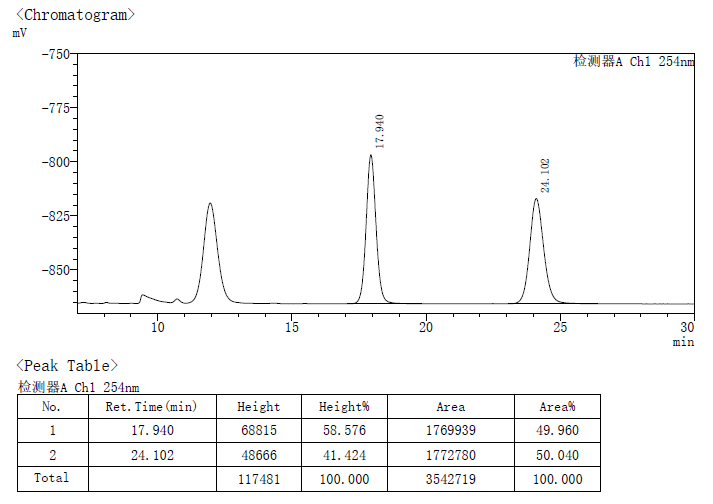


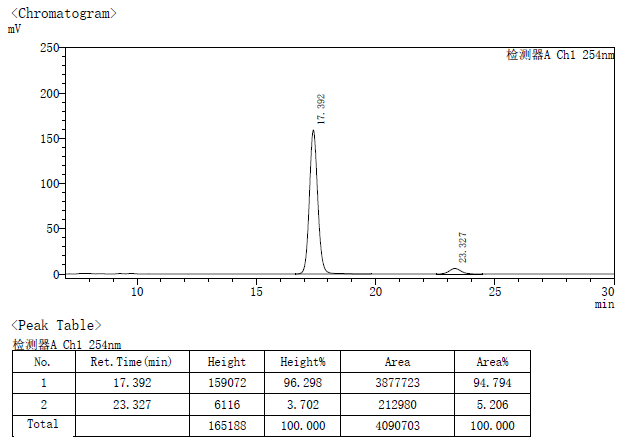


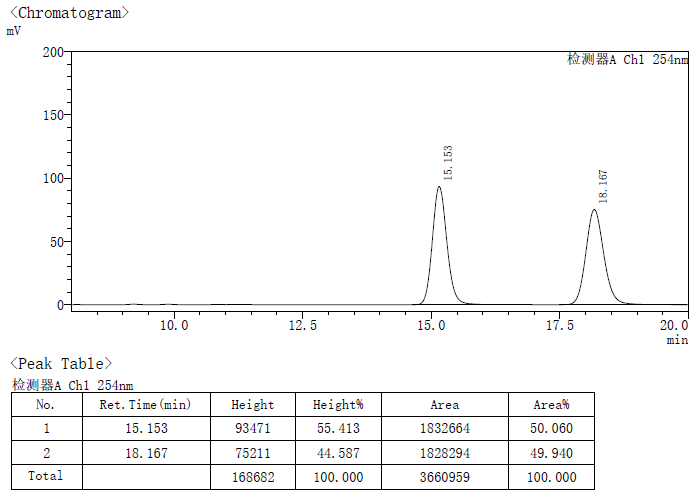


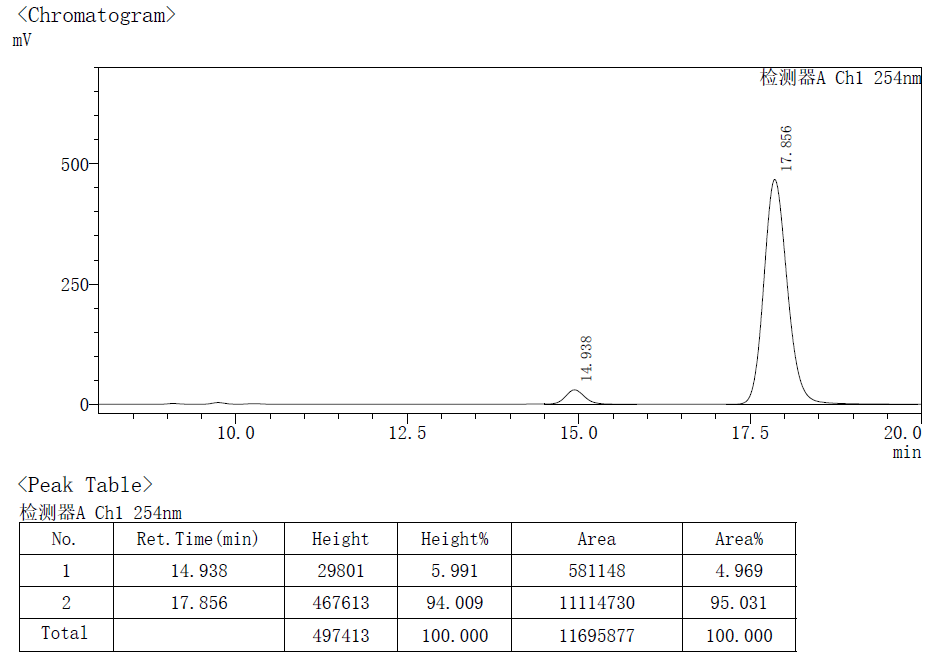


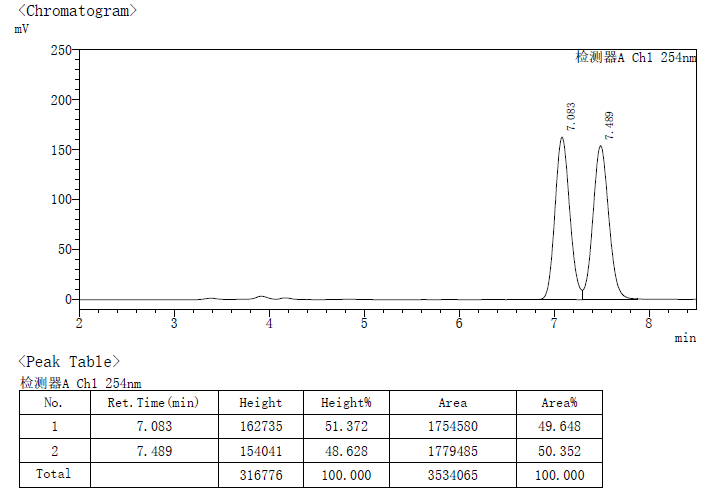


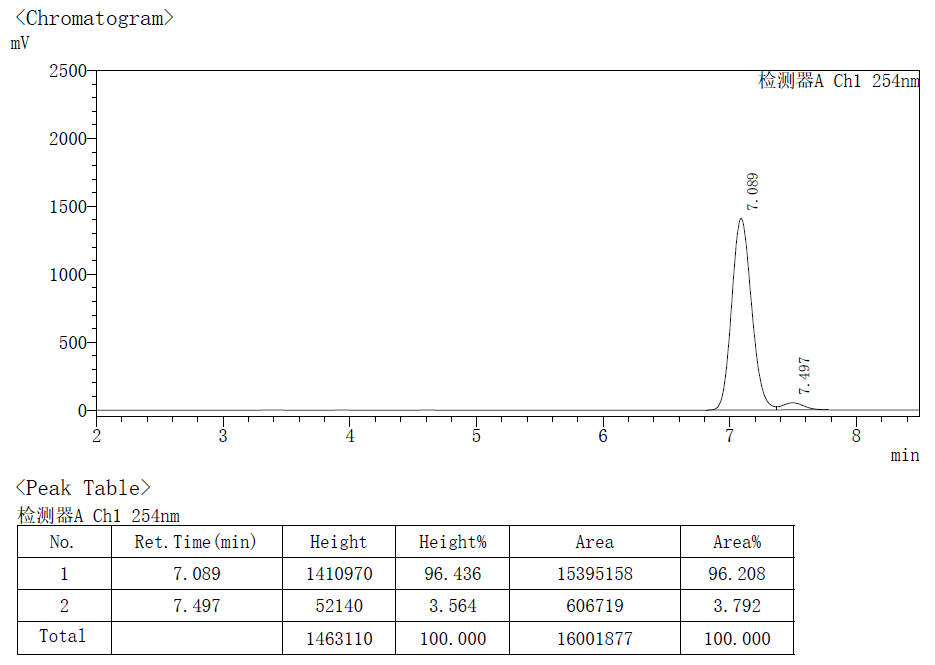


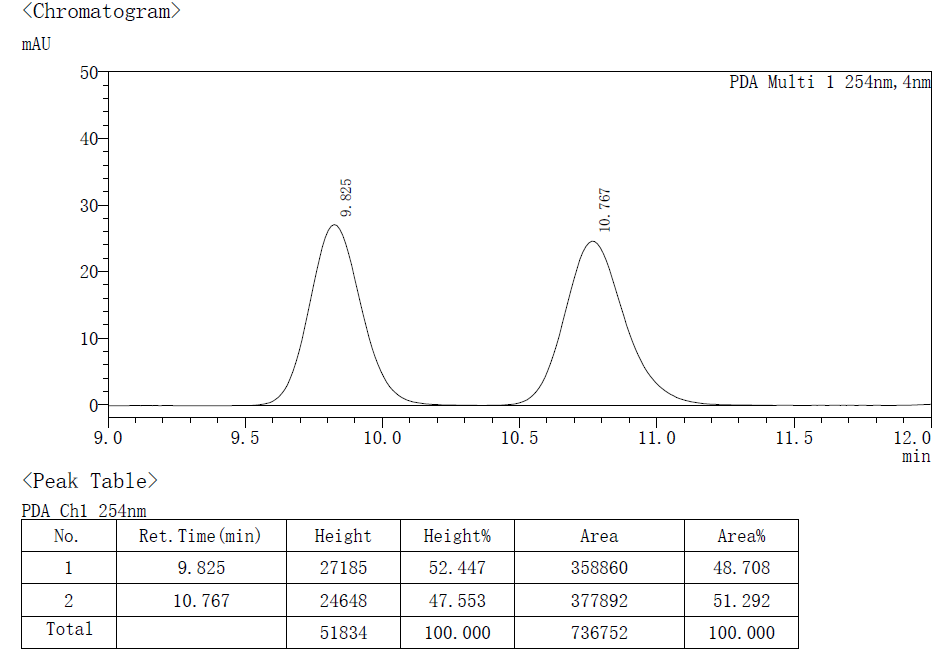


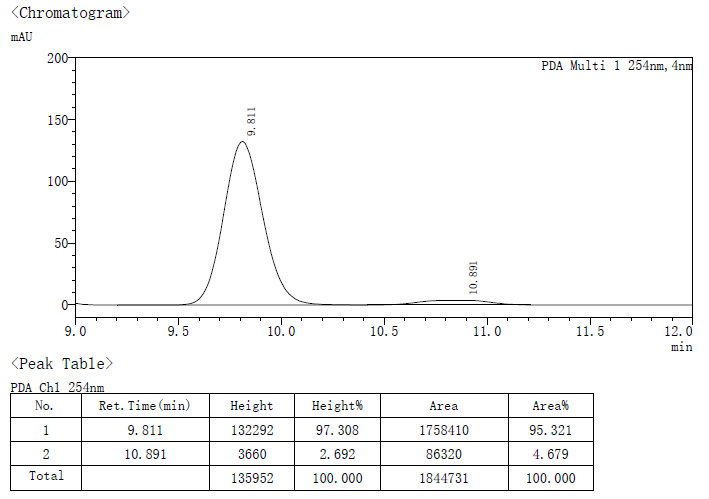


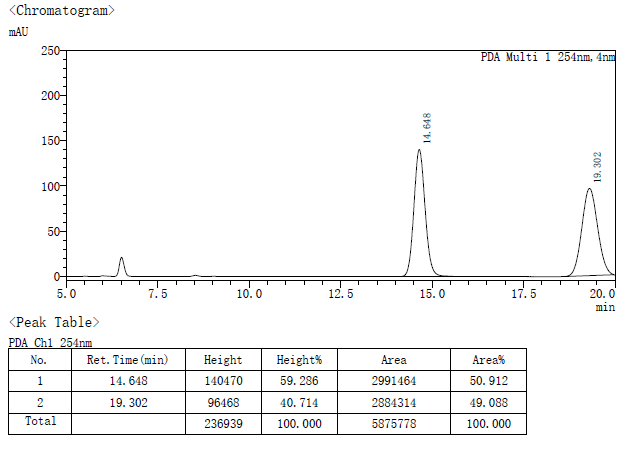


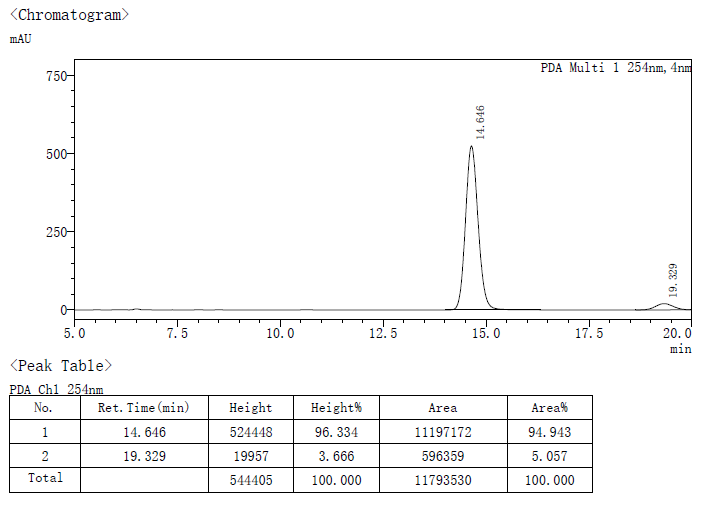


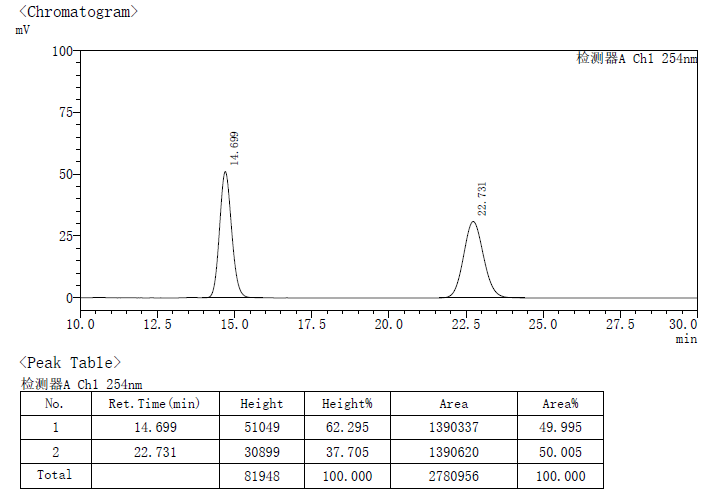


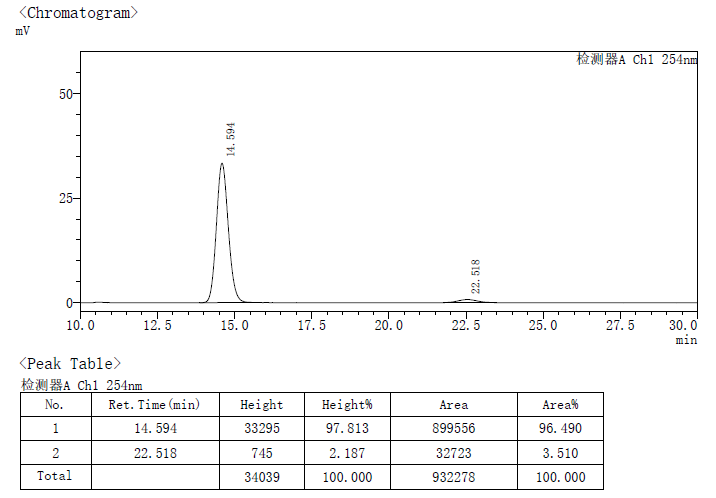


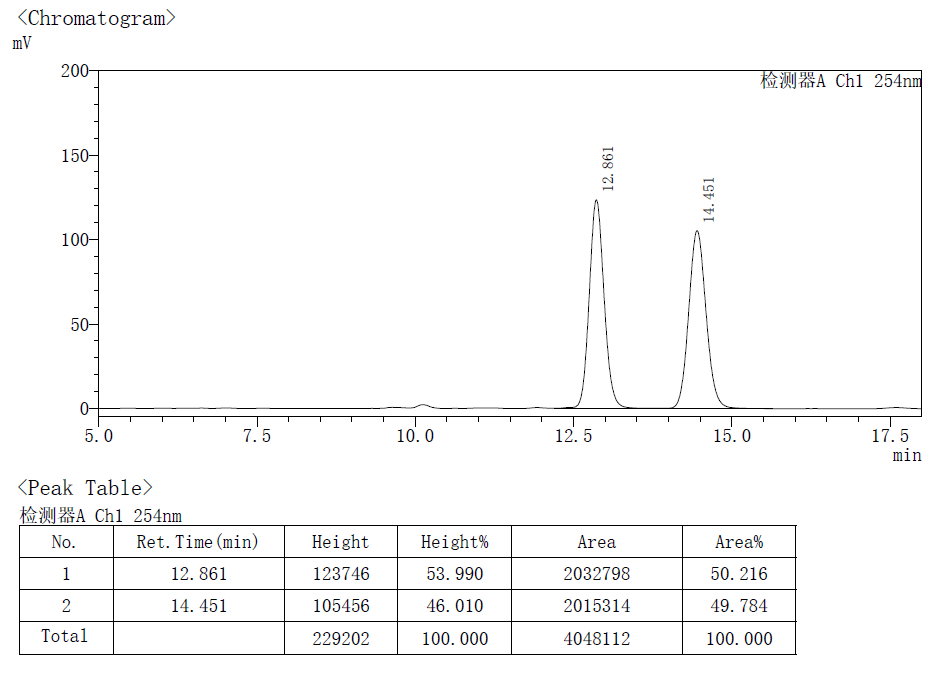


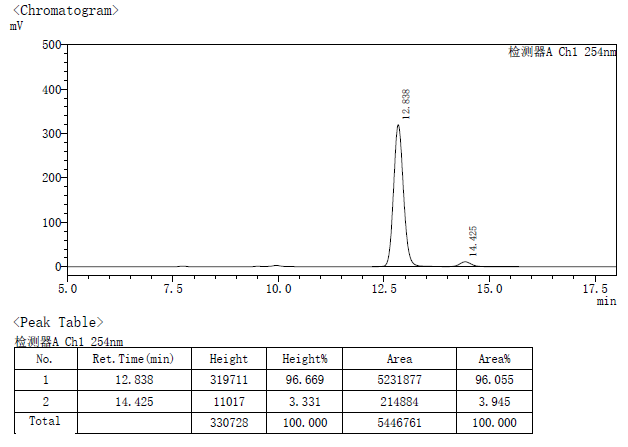


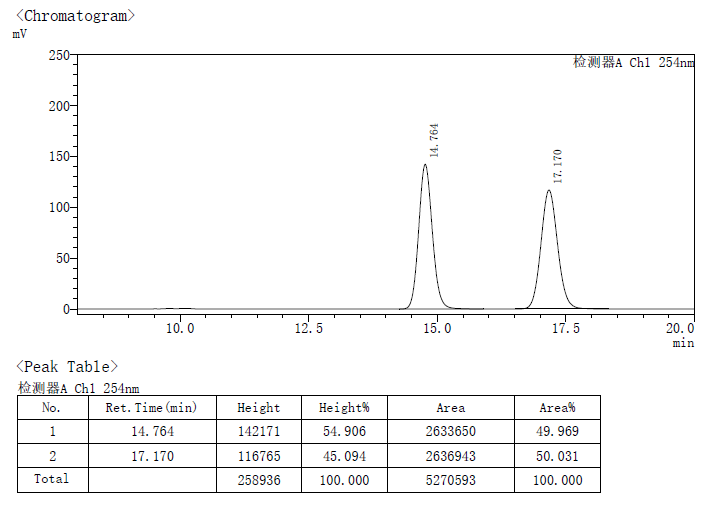


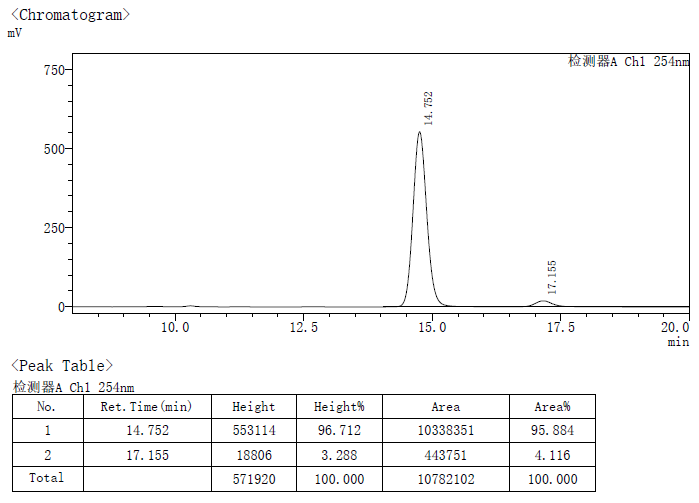


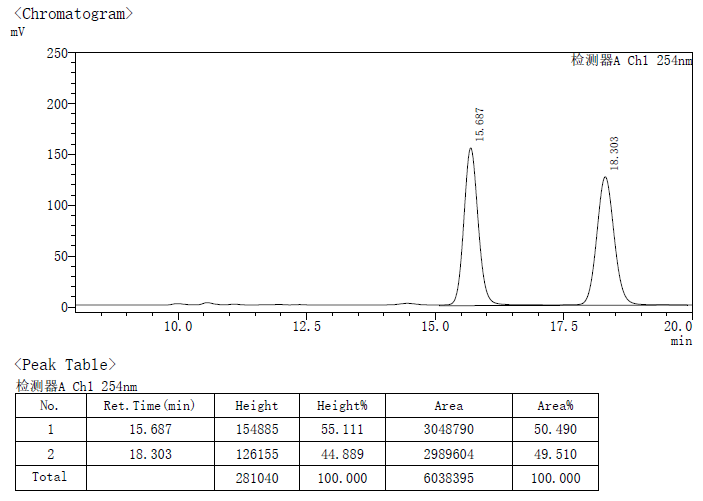


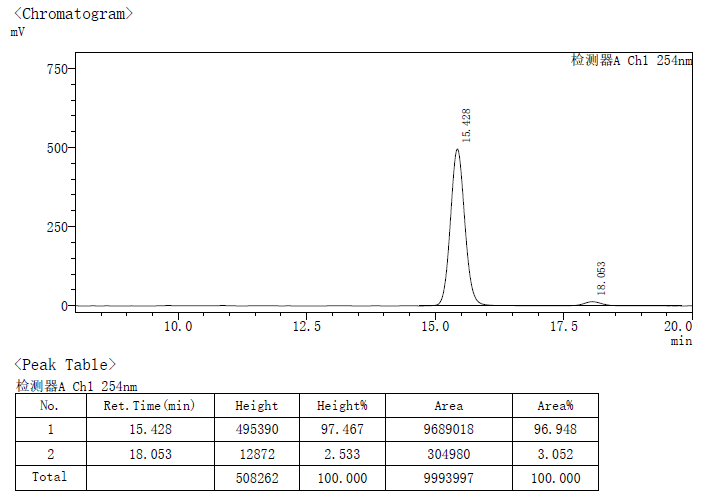


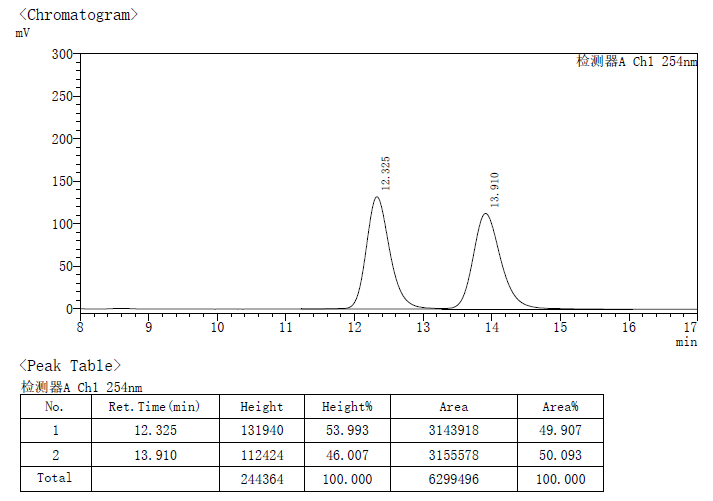


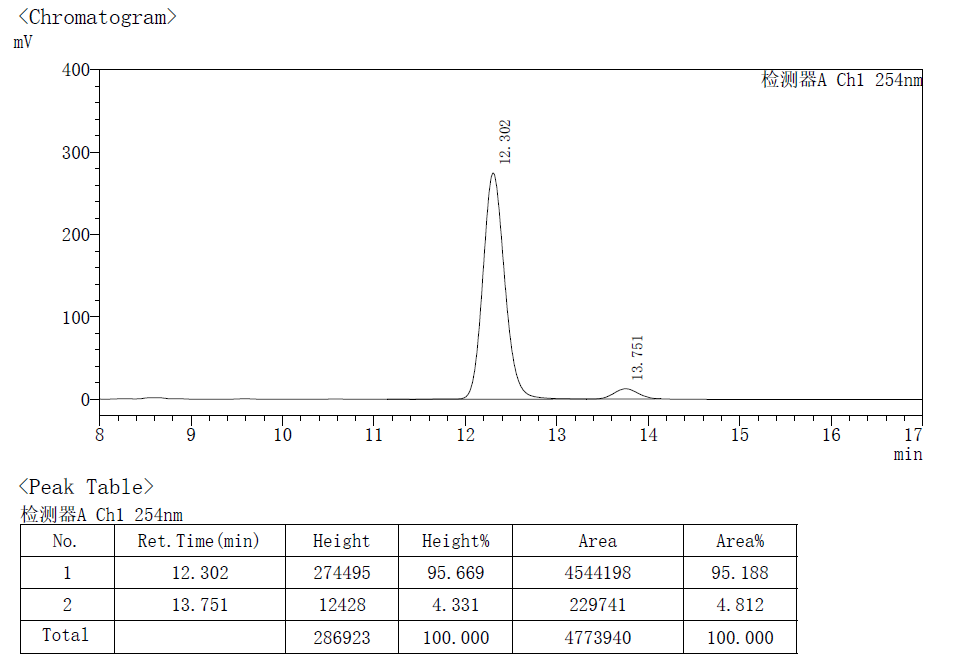


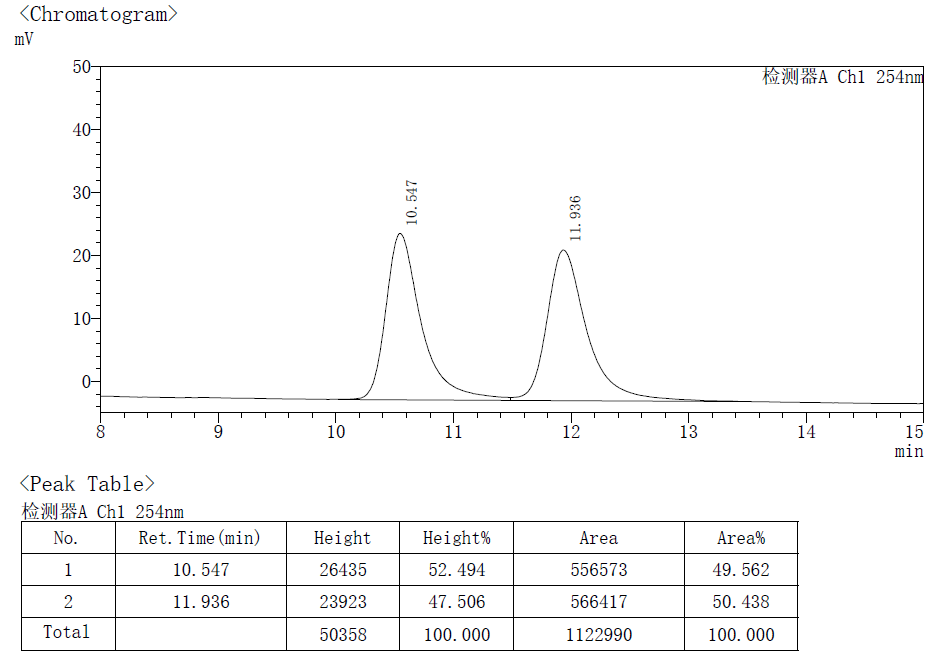


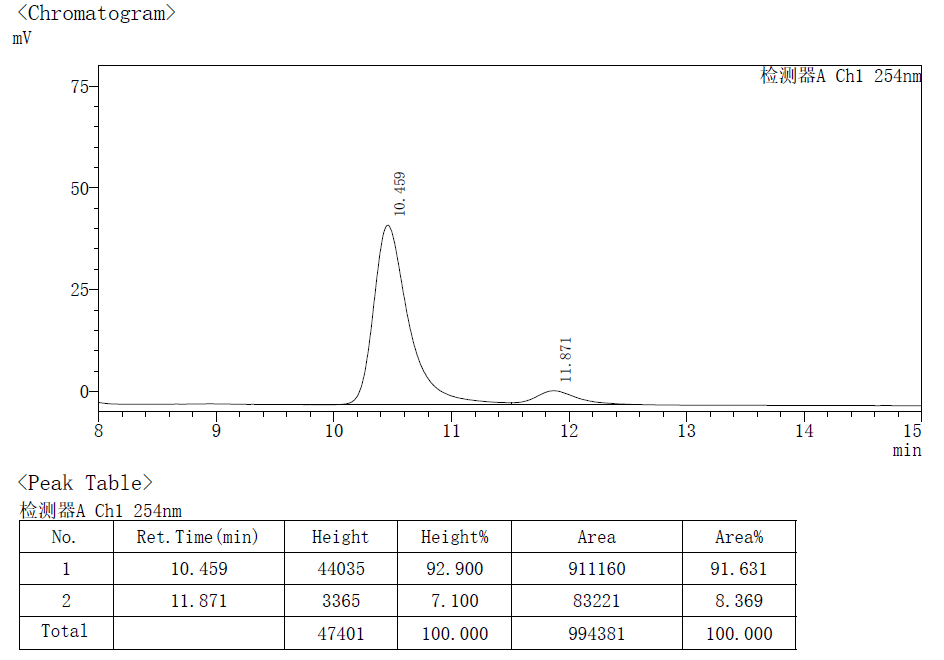


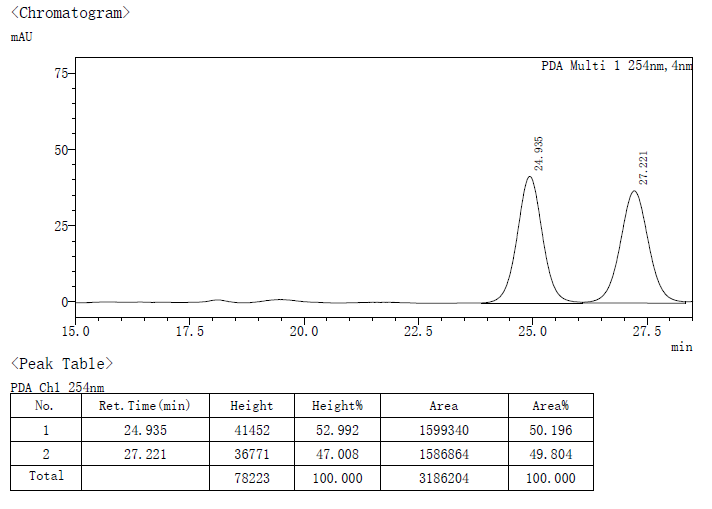


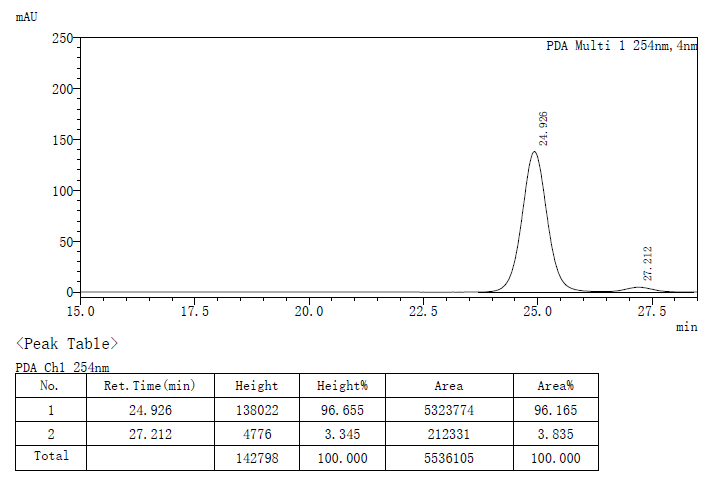


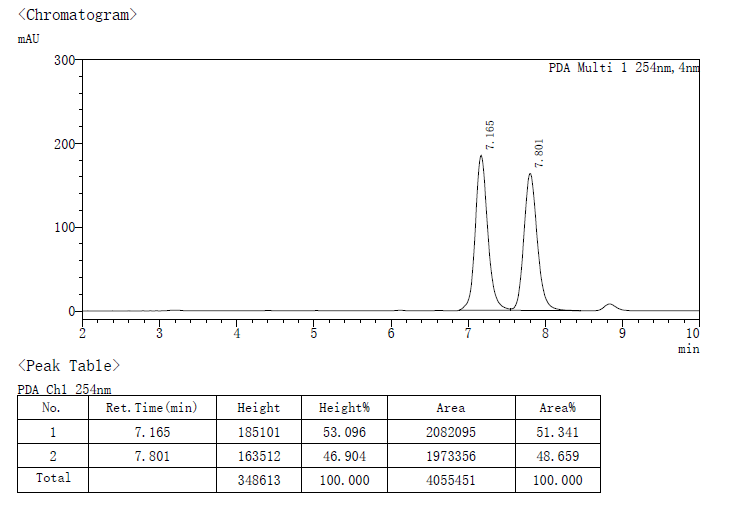


1. **References**
2. Cheng, G., Wang, X., Zhu, R., Shao, C., Xu, J., Hu, Y., and Li, Z. (2011). Total Synthesis of (-)-Cocaine and (-)-Ferruginine. *J. Org. Chem.* *76*, 2694−2700.
3. Tan, J.-P., Li, X., Chen, Y., Rong, X., Zhu, L., Jiang, C., Xiao, K., and Wang, T. (2020). Highly Stereoselective Construction of Polycyclic Benzofused Tropane Scaffolds and Their Latent Bioactivities: Bifunctional Phosphonium Salt-enabled Cyclodearomatization Process. *Sci. China. Chem. 63*, 1091−1099.
4. Xia, Q., Li, Y., Cheng, L., Liang, X., Cao, C., Dai, P., Deng, H., Zhang, W., and Wang, Q. (2020). Electron Donor−Acceptor Complex-Initiated PhotochemicalCyanation for the Preparation of α‑Amino Nitriles. *Org. Lett*. *22*, 9638−9643.
5. Patel, S. C., Smith, M. W., Mercer, J. A., Suzuki, K., and Burns, N. Z. (2021). Enantioselective Cyclobutenylation of Oleﬁns Using N‑Sulfonyl-1,2,3-Triazoles as Vicinal Dicarbene Equivalents. *Org. Lett*. *23*, 6530–6535.
6. Yue, S., Zhou, K., Ma, C., Li, Z., and Zhang, J. (2024). Rhodium/Ming-Phos-catalyzed asymmetric annulation reaction of silacyclobutanes with terminal alkynes. *Green. Synth. Catal.* *5*, 205–210.
7. Rong, X., Yang, J., Liu, S., Lan, Y., and Liu, Q. (2023). Remote Stereocontrol of All-Carbon Quaternary Centers via Cobalt-Catalyzed Asymmetric Oleﬁn Isomerization. *CCS. Chem.* *5*, 1293–1300
8. Wang, J., Xu, B., Wang, Y., Xia, G., Zhang, Z.-M., and Zhang, J. (2024). Pd-Catalyzed Enantioselective Three-Component Carboamination of 1,3-Cyclohexadiene *J. Am. Chem. Soc*. *146*, 21231−21238.
9. Zhang, Y., Goetzke, F. W., Christensen, K. E., and Fletcher, S. P. (1975). Asymmetric synthesis of nortropanes via Rh-catalyzed allylic arylation. *ACS. Catal.* *8*, 239−245.
10. Xu, B., Ji, D., Wu, L., Zhou, L., Liu, Y., Zhang, Z.-M., and Zhang, J. (2022). Palladium/Xu-Phos-catalyzed enantioselective cascade Heck/remote C(sp2)–H alkylation reaction. *Chem.* *8*, 836−849.
